# Supplementary material for: Palladium-catalyzed stereoselective decarboxylative allylation of azlactones: access to (Z)-trisubstituted allylic amino acid derivatives
Source: Royal Society of Chemistry journal article supplement (doi:10.1039/d2qo01297a), 2022-01-01
Supplement: d2qo01297a1.pdf [file d2qo01297a1.pdf]

# Palladium-catalyzed stereoselective decarboxylative allylation of azlactones: access to (*Z*)-trisubstituted allylic amino acid derivatives

Jian-Qiang Zhao,<sup>a,\*</sup> Han-Wen Rao<sup>a</sup>, Hui-Ling Qian<sup>a</sup>, Xue-Man Zhang<sup>a</sup>, Shun Zhou,<sup>a,b</sup> Yan-Ping  
Zhang,<sup>a</sup> Yong You,<sup>a</sup> Zhen-Hua Wang<sup>a</sup> and Wei-Cheng Yuan<sup>a,\*</sup>

<sup>a</sup>Innovation Research Center of Chiral Drugs, Institute for Advanced Study, Chengdu University,  
Chengdu 610106, China.

<sup>b</sup>National Engineering Research Center of Chiral Drugs, Chengdu Institute of Organic Chemistry,  
Chinese Academy of Sciences, Chengdu, 610041, China.

*E-mail:* zhaojianqiang@cdu.edu.cn;  
yuanwc@cioc.ac.cn

## Supporting Information

### Table of Contents

|                                                                                                |     |
|------------------------------------------------------------------------------------------------|-----|
| 1. General experimental information.....                                                       | S1  |
| 2. General experimental procedures for synthesis of compounds <b>3</b> .....                   | S1  |
| 3. Scale-up experiment .....                                                                   | S10 |
| 4. Synthesis of compound <b>5</b> .....                                                        | S10 |
| 5. Synthesis of compound <b>6</b> .....                                                        | S11 |
| 6. Synthesis of compound <b>7</b> .....                                                        | S11 |
| 7. The preliminary attempt to the asymmetric decarboxylative allylation.....                   | S12 |
| 8. X-Ray crystal data for compound <b>3ja</b> .....                                            | S12 |
| 9. <sup>1</sup> H and <sup>13</sup> C NMR, spectra for compounds <b>3</b> and <b>5-7</b> ..... | S14 |

## 1. General experimental information

Reagents were purchased from commercial sources and were used as received unless mentioned otherwise. Reactions were monitored by TLC.  $^1\text{H}$  NMR and  $^{13}\text{C}$  NMR spectra were recorded in  $\text{CDCl}_3$  and  $\text{DMSO-}d_6$ .  $^1\text{H}$  NMR chemical shifts are reported in ppm relative to tetramethylsilane (TMS) with the solvent resonance employed as the internal standard ( $\text{CDCl}_3$  at 7.26 ppm,  $\text{DMSO-}d_6$  at 2.50 ppm). Data are reported as follows: chemical shift, multiplicity (s = singlet, br s = broad singlet, d = doublet, t = triplet, q = quartet, m = multiplet), coupling constants (Hz) and integration.  $^{13}\text{C}$  NMR chemical shifts are reported in ppm from tetramethylsilane (TMS) with the solvent resonance as the internal standard ( $\text{CDCl}_3$  at 77.16 ppm,  $\text{DMSO-}d_6$  at 39.52 ppm). Melting points were recorded on a Büchi Melting Point B-545. The HRMS were recorded by Agilent 6545 LC/Q-TOF mass spectrometer.

## 2. General experimental procedures for synthesis of compounds 3

Method A: To a flame dried reaction tube were added  $\text{Pd}(\text{PPh}_3)_2\text{Cl}_2$  (3.5 mg, 5 mol%) and ligand **L4** (5.8 mg, 10 mol%), followed by addition distilled chlorobenzene (1.0 mL). Then vinyl methylene cyclic carbonates **1** (0.1 mmol) and azlatones **2** (0.1 mmol) were added at 0 °C under an argon atmosphere. After completion, the reaction mixture was directly purified by flash chromatography on silica gel (petroleum ether/ethyl acetate = 10:1 ~ 15:1) to give the corresponding product **3**.

Method B: To a flame dried reaction tube were added  $\text{Pd}(\text{PPh}_3)_2\text{Cl}_2$  (3.5 mg, 5 mol%) and ligand **L4** (5.8 mg, 10 mol%), followed by addition distilled  $\text{CH}_2\text{Cl}_2$  (1.0 mL). Then vinyl methylene cyclic carbonates **1** (0.1 mmol), *N*-acyl amino acids **4** (0.12 mmol, 1.2 equiv) and DCC (0.12 mmol, 1.2 equiv) were added at 0 °C under an argon atmosphere. After completion, the reaction mixture was directly purified by flash chromatography on silica gel (petroleum ether/ethyl acetate = 10:1 ~ 15:1) to give the corresponding product **3**.

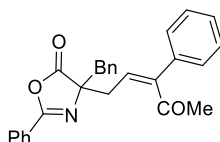

### (*Z*)-4-benzyl-4-(4-oxo-3-phenylpent-2-en-1-yl)-2-phenyloxazol-5(4H)-one (**3aa**)

Colourless oil, method A: 36.4 mg, 89% yield; method B: 28.0 mg, 68% yield;  $^1\text{H}$  NMR (400 MHz,  $\text{CDCl}_3$ )  $\delta$  7.93 – 7.82 (m, 2H), 7.57 – 7.50 (m, 1H), 7.47 – 7.40 (m, 2H), 7.32 – 7.27 (m, 3H), 7.22 – 7.09 (m, 7H), 5.81 (t,  $J$  = 7.8 Hz, 1H), 3.29 (d,  $J$  = 13.5 Hz, 1H), 3.22 (d,  $J$  = 13.4 Hz, 1H), 3.13 – 3.00 (m, 2H), 2.19 (s, 3H);  $^{13}\text{C}$  NMR (101 MHz,  $\text{CDCl}_3$ )  $\delta$  203.6, 179.1, 160.3, 147.8, 137.4, 134.2, 132.8, 130.3, 128.9, 128.4, 128.3, 127.9, 127.4, 127.3, 126.8, 125.6, 74.6, 43.3, 36.7, 30.9; HRMS (ESI)  $m/z$ :  $[\text{M} + \text{H}]^+$  Calcd for  $\text{C}_{27}\text{H}_{24}\text{NO}_3$  410.1751; Found: 410.1753.

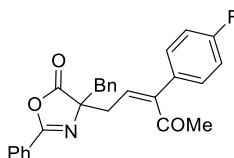

### (*Z*)-4-benzyl-4-(3-(4-fluorophenyl)-4-oxopent-2-en-1-yl)-2-phenyloxazol-5(4H)-one (**3ba**)

Colourless oil, method A: 34.8 mg, 81% yield; method B: 21.8 mg, 51% yield;  $^1\text{H}$  NMR (600 MHz,  $\text{CDCl}_3$ )  $\delta$  7.93 – 7.84 (m, 2H), 7.57 – 7.52 (m, 1H), 7.47 – 7.41 (m, 2H), 7.21 – 7.13 (m, 5H), 7.12 – 7.05 (m, 2H), 7.02 – 6.95 (m, 2H), 5.76 (t,  $J$  = 7.7 Hz, 1H), 3.27 (d,  $J$  = 13.5 Hz, 1H),

3.21 (d,  $J = 13.5$  Hz, 1H), 3.10 – 3.00 (m, 2H), 2.18 (s, 3H);  $^{13}\text{C}$  NMR (151 MHz,  $\text{CDCl}_3$ )  $\delta$  203.3, 179.0, 162.8 (d,  $J = 249.2$  Hz), 160.3, 146.7, 134.1, 133.5 (d,  $J = 3.4$  Hz), 132.9, 130.3, 129.1 (d,  $J = 8.2$  Hz), 128.9, 128.3, 127.9, 127.5, 127.0, 125.5, 115.9 (d,  $J = 21.5$  Hz), 74.6, 43.3, 36.7, 30.8; HRMS (ESI)  $m/z$ :  $[\text{M} + \text{H}]^+$  Calcd for  $\text{C}_{27}\text{H}_{23}\text{FNO}_3$  428.1656; Found: 428.1660.

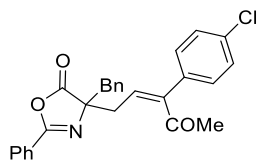

**(Z)-4-benzyl-4-(3-(4-chlorophenyl)-4-oxopent-2-en-1-yl)-2-phenyloxazol-5(4H)-one (3ca)**

Colourless oil, method B: 31.9 mg, 72% yield;  $^1\text{H}$  NMR (400 MHz,  $\text{CDCl}_3$ )  $\delta$  7.83 – 7.75 (m, 2H), 7.50 – 7.44 (m, 1H), 7.40 – 7.33 (m, 2H), 7.21 – 7.17 (m, 2H), 7.13 – 7.03 (m, 5H), 6.99 – 6.93 (m, 2H), 5.71 (t,  $J = 7.7$  Hz, 1H), 3.19 (d,  $J = 13.4$  Hz, 1H), 3.12 (d,  $J = 13.4$  Hz, 1H), 3.03 – 2.89 (m, 2H), 2.10 (s, 3H);  $^{13}\text{C}$  NMR (101 MHz,  $\text{CDCl}_3$ )  $\delta$  203.1, 179.0, 160.3, 146.6, 135.8, 134.5, 134.1, 132.9, 130.3, 129.1, 128.9, 128.6, 128.3, 127.9, 127.5, 127.4, 125.5, 74.5, 43.3, 36.7, 30.9. HRMS (ESI)  $m/z$ :  $[\text{M} + \text{H}]^+$  Calcd for  $\text{C}_{27}\text{H}_{23}\text{ClNO}_3$  444.1361; Found: 444.1366.

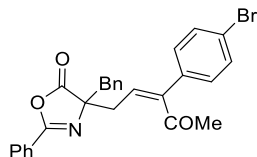

**(Z)-4-benzyl-4-(3-(4-bromophenyl)-4-oxopent-2-en-1-yl)-2-phenyloxazol-5(4H)-one (3da)**

White solid, method A, 43.2 mg, 89% yield; method B: 36.6 mg, 75% yield;  $^1\text{H}$  NMR (600 MHz,  $\text{DMSO}-d_6$ )  $\delta$  7.86 – 7.79 (m, 2H), 7.63 – 7.56 (m, 1H), 7.53 – 7.46 (m, 3H), 7.33 – 7.25 (m, 2H), 7.20 – 7.10 (m, 6H), 5.92 (t,  $J = 7.7$  Hz, 1H), 3.28 (d,  $J = 13.5$  Hz, 1H), 3.19 (d,  $J = 13.5$  Hz, 1H), 3.02 – 2.91 (m, 2H), 2.17 (s, 3H);  $^{13}\text{C}$  NMR (151 MHz,  $\text{DMSO}-d_6$ )  $\delta$  201.9, 178.3, 159.2, 145.1, 139.1, 134.1, 132.8, 130.9, 130.6, 129.9, 129.4, 128.9, 127.8, 127.3, 127.0, 125.8, 124.9, 122.0, 73.6, 41.9, 35.9, 30.6. HRMS (ESI)  $m/z$ :  $[\text{M} + \text{H}]^+$  Calcd for  $\text{C}_{27}\text{H}_{23}\text{BrNO}_3$  488.0856; Found: 488.0861.

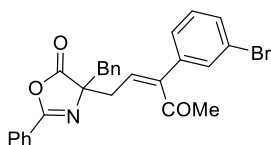

**(Z)-4-benzyl-4-(3-(3-bromophenyl)-4-oxopent-2-en-1-yl)-2-phenyloxazol-5(4H)-one (3ea)**

White solid, method A, 23.0 mg, 47% yield; method B: 39.0 mg, 80% yield, m.p. 114.3–114.9 °C;  $^1\text{H}$  NMR (400 MHz,  $\text{DMSO}-d_6$ )  $\delta$  7.85 – 7.77 (m, 2H), 7.64 – 7.57 (m, 1H), 7.55 – 7.47 (m, 3H), 7.35 – 7.27 (m, 2H), 7.23 – 7.07 (m, 6H), 5.94 (t,  $J = 7.7$  Hz, 1H), 3.29 (d,  $J = 13.4$  Hz, 1H), 3.20 (d,  $J = 13.5$  Hz, 1H), 3.03 – 2.92 (m, 2H), 2.17 (s, 3H);  $^{13}\text{C}$  NMR (101 MHz,  $\text{DMSO}-d_6$ )  $\delta$  202.4, 178.5, 159.3, 145.1, 139.2, 134.4, 133.1, 131.1, 130.9, 130.1, 129.4, 129.1, 128.0, 127.9, 127.5, 127.2, 126.0, 125.0, 122.1, 73.7, 41.9, 35.9, 30.8. HRMS (ESI)  $m/z$ :  $[\text{M} + \text{H}]^+$  Calcd for  $\text{C}_{27}\text{H}_{23}\text{BrNO}_3$  488.0856; Found: 488.0856.

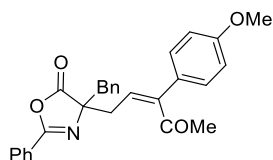

**(Z)-4-benzyl-4-(3-(4-methoxyphenyl)-4-oxopent-2-en-1-yl)-2-phenyloxazol-5(4H)-one (3fa)**

Colourless oil, method A, 25.8 mg, 59% yield; method B: 24.7 mg, 56% yield;  $^1\text{H NMR}$  (400 MHz,  $\text{DMSO-}d_6$ )  $\delta$  7.88 – 7.78 (m, 2H), 7.66 – 7.59 (m, 1H), 7.56 – 7.48 (m, 2H), 7.22 – 7.12 (m, 5H), 7.11 – 7.05 (m, 2H), 6.93 – 6.86 (m, 2H), 5.73 (t,  $J = 7.8$  Hz, 1H), 3.73 (s, 3H), 3.28 (d,  $J = 13.5$  Hz, 1H), 3.20 (d,  $J = 13.5$  Hz, 1H), 2.93 (dd,  $J = 7.9, 2.6$  Hz, 2H), 2.15 (s, 3H);  $^{13}\text{C NMR}$  (101 MHz,  $\text{DMSO-}d_6$ )  $\delta$  203.5, 178.6, 159.3, 159.2, 146.5, 134.4, 133.0, 130.0, 129.1, 128.8, 128.0, 127.9, 127.4, 127.1, 125.0, 123.3, 114.3, 73.9, 55.2, 42.0, 40.2, 30.7. HRMS (ESI)  $m/z$ :  $[\text{M} + \text{H}]^+$  Calcd for  $\text{C}_{28}\text{H}_{26}\text{NO}_4$  440.1856; Found: 440.1863.

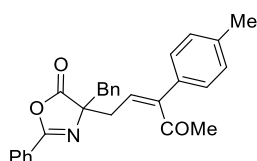

**(Z)-4-benzyl-4-(4-oxo-3-(p-tolyl)pent-2-en-1-yl)-2-phenyloxazol-5(4H)-one (3ga)**

Colourless oil, method A, 34.5 mg, 82% yield; method B: 32.1 mg, 76% yield;  $^1\text{H NMR}$  (600 MHz,  $\text{CDCl}_3$ )  $\delta$  7.87 (dd,  $J = 8.1, 1.4$  Hz, 2H), 7.57 – 7.50 (m, 1H), 7.47 – 7.41 (m, 2H), 7.19 – 7.13 (m, 5H), 7.10 (d,  $J = 7.9$  Hz, 2H), 7.04 – 6.98 (m, 2H), 5.76 (t,  $J = 7.7$  Hz, 1H), 3.28 (d,  $J = 13.5$  Hz, 1H), 3.21 (d,  $J = 13.5$  Hz, 1H), 3.09 – 3.00 (m, 2H), 2.32 (s, 3H), 2.19 (s, 3H);  $^{13}\text{C NMR}$  (151 MHz,  $\text{CDCl}_3$ )  $\delta$  204.0, 179.1, 160.3, 147.7, 138.3, 134.5, 134.2, 132.8, 130.3, 129.5, 128.9, 128.3, 127.9, 127.4, 127.2, 125.8, 125.6, 74.7, 43.3, 36.7, 30.9, 21.2. HRMS (ESI)  $m/z$ :  $[\text{M} + \text{H}]^+$  Calcd for  $\text{C}_{28}\text{H}_{26}\text{NO}_3$  424.1907; Found: 424.1911.

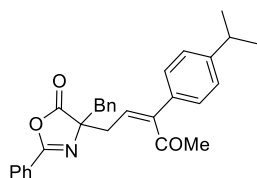

**(Z)-4-benzyl-4-(3-(4-isopropylphenyl)-4-oxopent-2-en-1-yl)-2-phenyloxazol-5(4H)-one (3ha)**

Colourless oil, method A, 34.8 mg, 77% yield;  $^1\text{H NMR}$  (600 MHz,  $\text{DMSO-}d_6$ )  $\delta$  7.88 – 7.80 (m, 2H), 7.68 – 7.59 (m, 1H), 7.56 – 7.49 (m, 2H), 7.24 – 7.18 (m, 4H), 7.17 – 7.12 (m, 3H), 7.10 – 7.06 (m, 2H), 5.80 (t,  $J = 7.8$  Hz, 1H), 3.29 (d,  $J = 13.6$  Hz, 1H), 3.21 (d,  $J = 13.5$  Hz, 1H), 3.00 – 2.91 (m, 2H), 2.85 (p,  $J = 6.9$  Hz, 1H), 2.17 (s, 3H), 1.17 (s, 3H), 1.16 (s, 3H);  $^{13}\text{C NMR}$  (151 MHz,  $\text{DMSO-}d_6$ )  $\delta$  203.5, 178.6, 159.2, 148.6, 146.8, 134.4, 134.1, 133.1, 130.1, 129.2, 128.0, 127.5, 127.2, 126.9, 126.6, 125.0, 124.5, 73.9, 42.0, 35.8, 33.1, 30.8, 23.7, 23.6. HRMS (ESI)  $m/z$ :  $[\text{M} + \text{H}]^+$  Calcd for  $\text{C}_{30}\text{H}_{30}\text{NO}_3$  452.2220; Found: 452.2225.

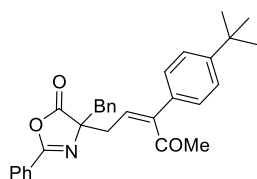

**(Z)-4-benzyl-4-(3-(4-(tert-butyl)phenyl)-4-oxopent-2-en-1-yl)-2-phenyloxazol-5(4H)-one (3ia)**

Colourless oil, method A, 40.6 mg, 87% yield;  $^1\text{H}$  NMR (600 MHz,  $\text{DMSO-}d_6$ )  $\delta$  7.86 – 7.80 (m, 2H), 7.66 – 7.59 (m, 1H), 7.54 – 7.50 (m, 2H), 7.38 – 7.34 (m, 2H), 7.21 – 7.17 (m, 2H), 7.16 – 7.11 (m, 3H), 7.11 – 7.07 (m, 2H), 5.80 (t,  $J = 7.8$  Hz, 1H), 3.28 (d,  $J = 13.6$  Hz, 1H), 3.20 (d,  $J = 13.6$  Hz, 1H), 2.99 – 2.90 (m, 2H), 2.17 (s, 3H), 1.24 (s, 9H);  $^{13}\text{C}$  NMR (151 MHz,  $\text{DMSO-}d_6$ )  $\delta$  203.5, 178.6, 159.2, 150.9, 146.7, 134.4, 133.7, 133.1, 130.0, 129.2, 128.0, 127.5, 127.2, 126.3, 125.7, 125.0, 124.5, 73.9, 42.0, 35.8, 34.3, 31.0, 30.8. HRMS (ESI)  $m/z$ :  $[\text{M} + \text{H}]^+$  Calcd for  $\text{C}_{31}\text{H}_{32}\text{NO}_3$  466.2377; Found: 466.2383.

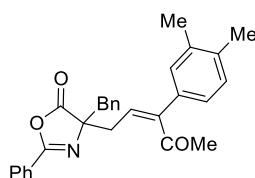

**(Z)-4-benzyl-4-(3-(3,4-dimethylphenyl)-4-oxopent-2-en-1-yl)-2-phenyloxazol-5(4H)-one (3ja)**

White solid, method A, 27.2 mg, 62% yield; method B: 32.8 mg, 75% yield; m.p. 137.1-137.9 °C.  $^1\text{H}$  NMR (400 MHz,  $\text{DMSO-}d_6$ )  $\delta$  7.83 (d,  $J = 7.7$  Hz, 2H), 7.63 – 7.56 (m, 1H), 7.52 – 7.45 (m, 2H), 7.19 – 7.08 (m, 5H), 7.04 (d,  $J = 7.7$  Hz, 1H), 6.81 (d,  $J = 8.3$  Hz, 2H), 5.70 (t,  $J = 7.9$  Hz, 1H), 3.26 (d,  $J = 13.5$  Hz, 1H), 3.17 (d,  $J = 13.5$  Hz, 1H), 2.96 – 2.87 (m, 2H), 2.17 (s, 3H), 2.12 (s, 6H);  $^{13}\text{C}$  NMR (101 MHz,  $\text{DMSO-}d_6$ )  $\delta$  203.4, 178.8, 159.7, 147.5, 137.0, 136.9, 134.7, 133.3, 130.4, 130.2, 129.3, 128.3, 128.2, 127.8, 127.5, 125.5, 124.8, 124.4, 74.4, 42.5, 36.4, 30.9, 19.7, 19.5. HRMS (ESI)  $m/z$ :  $[\text{M} + \text{H}]^+$  Calcd for  $\text{C}_{29}\text{H}_{28}\text{NO}_3$  438.2064; Found: 438.2070.

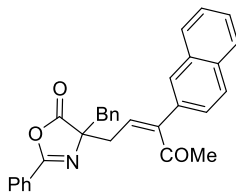

**(Z)-4-benzyl-4-(3-(naphthalen-2-yl)-4-oxopent-2-en-1-yl)-2-phenyloxazol-5(4H)-one (3ka)**

Colourless oil, method A, 40.2 mg, 88% yield; method B: 22.5 mg, 49% yield;  $^1\text{H}$  NMR (600 MHz,  $\text{DMSO-}d_6$ )  $\delta$  7.91 – 7.81 (m, 5H), 7.66 – 7.60 (m, 2H), 7.55 – 7.47 (m, 4H), 7.36 (dd,  $J = 8.6, 1.9$  Hz, 1H), 7.22 – 7.13 (m, 5H), 6.02 (t,  $J = 7.8$  Hz, 1H), 3.33 (d,  $J = 13.5$  Hz, 1H), 3.24 (d,  $J = 13.6$  Hz, 1H), 3.07 – 2.98 (m, 2H), 2.23 (s, 3H);  $^{13}\text{C}$  NMR (151 MHz,  $\text{DMSO-}d_6$ )  $\delta$  203.3, 178.6, 159.3, 146.8, 134.4, 134.0, 133.1, 132.8, 132.5, 130.1, 129.2, 128.5, 128.1, 128.0, 127.6, 127.5, 127.2, 126.7, 126.6, 125.9, 125.8, 125.0, 124.5, 74.0, 42.0, 36.0, 30.9. HRMS (ESI)  $m/z$ :  $[\text{M} + \text{H}]^+$  Calcd for  $\text{C}_{31}\text{H}_{26}\text{NO}_3$  460.1907; Found: 460.1912.

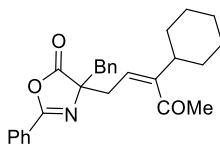

**(Z)-4-benzyl-4-(3-cyclohexyl-4-oxopent-2-en-1-yl)-2-phenyloxazol-5(4H)-one (3la)**

Colourless oil, method A, 15.9 mg, 38% yield; method B: 36.3 mg, 87% yield;  $^1\text{H}$  NMR (400 MHz,  $\text{DMSO-}d_6$ )  $\delta$  7.85 – 7.73 (m, 2H), 7.67 – 7.59 (m, 1H), 7.52 (t,  $J = 7.7$  Hz, 2H), 7.24 – 7.01 (m, 5H), 5.22 (t,  $J = 7.8$  Hz, 1H), 3.21 (d,  $J = 13.5$  Hz, 1H), 3.13 (d,  $J = 13.4$  Hz, 1H), 2.77 (d,  $J = 7.8$  Hz, 2H), 2.21 (s, 3H), 2.21 – 2.13 (m, 1H), 1.67 – 1.45 (m, 5H), 1.26 – 1.13 (m, 2H), 1.08 – 0.90 (m, 3H);  $^{13}\text{C}$  NMR (101 MHz,  $\text{DMSO-}d_6$ )  $\delta$  204.9, 178.6, 159.0, 152.1, 134.4, 133.0, 130.0,

129.1, 128.0, 127.4, 127.1, 125.0, 120.0, 74.1, 42.0, 38.9, 35.6, 31.8, 31.6, 30.4, 25.8, 25.8, 25.4. HRMS (ESI)  $m/z$ :  $[M + Na]^+$  Calcd for  $C_{27}H_{29}NaNO_3$  438.2040; Found: 438.2042.

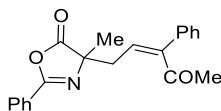

**(Z)-4-methyl-4-(4-oxo-3-phenylpent-2-en-1-yl)-2-phenyloxazol-5(4H)-one (3ab)**

Colourless oil, method A, 27.3 mg, 82% yield; method B: 18.2 mg, 55% yield;  $^1H$  NMR (600 MHz,  $CDCl_3$ )  $\delta$  8.06 – 7.99 (m, 2H), 7.61 – 7.57 (m, 1H), 7.53 – 7.47 (m, 2H), 7.29 (dd,  $J = 5.1$ , 1.9 Hz, 3H), 7.15 – 7.10 (m, 2H), 5.77 (t,  $J = 7.7$  Hz, 1H), 2.97 – 2.86 (m, 2H), 2.18 (s, 3H), 1.58 (s, 3H);  $^{13}C$  NMR (151 MHz,  $CDCl_3$ )  $\delta$  203.6, 180.2, 160.3, 147.7, 137.4, 133.0, 129.0, 128.9, 128.4, 128.1, 127.3, 126.9, 125.8, 69.5, 37.5, 30.9, 23.4. HRMS (ESI)  $m/z$ :  $[M + H]^+$  Calcd for  $C_{21}H_{20}NO_3$  334.1438; Found: 334.1443.

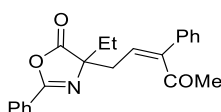

**(Z)-4-ethyl-4-(4-oxo-3-phenylpent-2-en-1-yl)-2-phenyloxazol-5(4H)-one (3ac)**

Colourless oil, method A, 16.8 mg, 48% yield; method B: 24.5 mg, 71% yield;  $^1H$  NMR (400 MHz,  $CDCl_3$ )  $\delta$  8.08 – 7.98 (m, 2H), 7.62 – 7.56 (m, 1H), 7.50 (t,  $J = 7.7$  Hz, 2H), 7.33 – 7.26 (m, 3H), 7.11 (dd,  $J = 6.7$ , 2.9 Hz, 2H), 5.76 (t,  $J = 7.8$  Hz, 1H), 3.03 – 2.85 (m, 2H), 2.17 (s, 3H), 2.06 – 1.97 (m, 2H), 0.88 (t,  $J = 7.4$  Hz, 3H);  $^{13}C$  NMR (101 MHz,  $CDCl_3$ )  $\delta$  203.7, 179.8, 160.5, 147.6, 137.5, 133.0, 129.0, 128.9, 128.3, 128.1, 127.3, 126.9, 125.8, 74.0, 36.6, 30.9, 30.3, 8.3. HRMS (ESI)  $m/z$ :  $[M + H]^+$  Calcd for  $C_{22}H_{22}NO_3$  348.1594; Found: 348.1598.

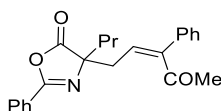

**(Z)-4-(4-oxo-3-phenylpent-2-en-1-yl)-2-phenyl-4-propyloxazol-5(4H)-one (3ad)**

Colourless oil, method A, 19.1 mg, 53% yield; method B: 25.0 mg, 69% yield;  $^1H$  NMR (600 MHz, Chloroform- $d$ )  $\delta$  8.09 – 7.92 (m, 2H), 7.64 – 7.55 (m, 1H), 7.54 – 7.45 (m, 2H), 7.31 – 7.22 (m, 3H), 7.11 (dt,  $J = 5.8$ , 3.0 Hz, 2H), 5.81 – 5.68 (m, 1H), 2.97 (ddd,  $J = 14.8$ , 7.6, 3.7 Hz, 1H), 2.89 (ddd,  $J = 14.9$ , 7.9, 3.7 Hz, 1H), 2.17 (d,  $J = 3.8$  Hz, 3H), 1.99 – 1.87 (m, 2H), 1.31 (dq,  $J = 16.4$ , 7.8, 4.6 Hz, 1H), 1.25 – 1.16 (m, 1H), 0.95 – 0.85 (m, 3H);  $^{13}C$  NMR (151 MHz,  $CDCl_3$ )  $\delta$  203.7, 179.9, 160.4, 147.6, 137.4, 133.0, 129.0, 128.8, 128.3, 128.1, 127.3, 126.9, 125.7, 73.5, 39.2, 36.9, 30.9, 17.4, 14.0. HRMS (ESI)  $m/z$ :  $[M + H]^+$  Calcd for  $C_{23}H_{24}NO_3$  362.1751; Found: 362.1755.

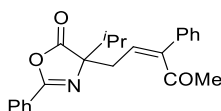

**(Z)-4-isopropyl-4-(4-oxo-3-phenylpent-2-en-1-yl)-2-phenyloxazol-5(4H)-one (3ae)**

Colourless oil, method A, 28.9 mg, 80% yield; method B: 25.3 mg, 70% yield;  $^1H$  NMR (400 MHz, Chloroform- $d$ )  $\delta$  8.12 – 7.94 (m, 2H), 7.63 – 7.54 (m, 1H), 7.50 (dd,  $J = 8.5$ , 6.9 Hz, 2H), 7.27 (dd,  $J = 5.6$ , 2.4 Hz, 3H), 7.14 – 7.00 (m, 2H), 5.69 (t,  $J = 7.8$  Hz, 1H), 3.03 (dd,  $J = 14.8$ , 7.3 Hz, 1H), 2.93 (dd,  $J = 14.8$ , 8.1 Hz, 1H), 2.24 (q,  $J = 7.0$  Hz, 1H), 2.16 (d,  $J = 1.4$  Hz, 3H), 1.09 (d,

$J = 6.8$  Hz, 3H), 0.96 (d,  $J = 6.8$  Hz, 3H);  $^{13}\text{C}$  NMR (101 MHz,  $\text{cdCl}_3$ )  $\delta$  203.8, 179.8, 160.4, 147.7, 137.5, 132.9, 129.0, 128.8, 128.3, 128.1, 127.3, 127.2, 125.8, 76.7, 34.8, 34.5, 30.8, 17.2, 16.9. HRMS (ESI)  $m/z$ :  $[\text{M} + \text{H}]^+$  Calcd for  $\text{C}_{23}\text{H}_{24}\text{NO}_3$  362.1751; Found: 362.1755.

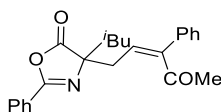

**(Z)-4-isobutyl-4-(4-oxo-3-phenylpent-2-en-1-yl)-2-phenyloxazol-5(4H)-one (3af)**

Colourless oil, method A, 17.6 mg, 47% yield; method B: 21.5 mg, 57% yield;  $^1\text{H}$  NMR (400 MHz, Chloroform-*d*)  $\delta$  8.09 – 7.98 (m, 2H), 7.63 – 7.55 (m, 1H), 7.55 – 7.47 (m, 2H), 7.32 – 7.23 (m, 3H), 7.15 – 7.04 (m, 2H), 5.71 (t,  $J = 7.8$  Hz, 1H), 2.99 – 2.82 (m, 2H), 2.15 (q,  $J = 1.1$  Hz, 3H), 2.06 – 1.97 (m, 1H), 1.91 – 1.81 (m, 1H), 1.71 – 1.62 (m, 1H), 0.91 (d,  $J = 6.7$  Hz, 3H), 0.86 (d,  $J = 6.6$  Hz, 3H);  $^{13}\text{C}$  NMR (101 MHz,  $\text{CDCl}_3$ )  $\delta$  203.7, 180.4, 160.1, 147.9, 137.4, 133.0, 129.0, 128.8, 128.3, 128.1, 127.3, 126.6, 125.8, 73.1, 45.8, 38.0, 30.8, 25.1, 24.2, 23.1. HRMS (ESI)  $m/z$ :  $[\text{M} + \text{H}]^+$  Calcd for  $\text{C}_{24}\text{H}_{26}\text{NO}_3$  376.1907; Found: 376.1910.

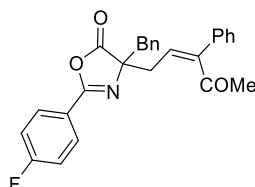

**(Z)-4-benzyl-2-(4-fluorophenyl)-4-(4-oxo-3-phenylpent-2-en-1-yl)oxazol-5(4H)-one (3ag)**

Colourless oil, method A, 37.9 mg, 89% yield; method B: 23.2 mg, 54% yield;  $^1\text{H}$  NMR (400 MHz,  $\text{CDCl}_3$ )  $\delta$  7.93 – 7.82 (m, 2H), 7.30 (t,  $J = 3.3$  Hz, 3H), 7.19 – 7.08 (m, 9H), 5.80 (t,  $J = 7.8$  Hz, 1H), 3.27 (d,  $J = 13.5$  Hz, 1H), 3.21 (d,  $J = 13.5$  Hz, 1H), 3.12 – 2.98 (m, 2H), 2.19 (s, 3H);  $^{13}\text{C}$  NMR (101 MHz,  $\text{CDCl}_3$ )  $\delta$  203.6, 178.8, 165.6 (d,  $J = 255.8$  Hz), 159.4, 147.7, 137.4, 134.1, 130.4, 130.3, 128.9, 128.4, 128.3, 127.4, 127.3, 126.8, 121.8 (d,  $J = 3.1$  Hz), 116.2 (d,  $J = 22.4$  Hz), 74.6, 43.3, 36.7, 30.9. HRMS (ESI)  $m/z$ :  $[\text{M} + \text{H}]^+$  Calcd for  $\text{C}_{27}\text{H}_{23}\text{NO}_3$  428.1656; Found: 428.1667.

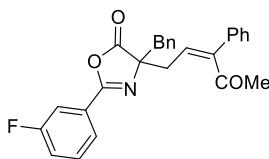

**(Z)-4-benzyl-2-(3-fluorophenyl)-4-(4-oxo-3-phenylpent-2-en-1-yl)oxazol-5(4H)-one (3ah)**

Colourless oil, method B, 19.1 mg, 45% yield;  $^1\text{H}$  NMR (400 MHz,  $\text{CDCl}_3$ )  $\delta$  7.68 – 7.62 (m, 1H), 7.61 – 7.54 (m, 1H), 7.45 – 7.38 (m, 1H), 7.31 (dd,  $J = 5.0, 2.0$  Hz, 3H), 7.25 – 7.17 (m, 2H), 7.16 (dd,  $J = 6.6, 2.4$  Hz, 4H), 7.12 (dd,  $J = 6.7, 3.0$  Hz, 2H), 5.79 (t,  $J = 7.7$  Hz, 1H), 3.28 (d,  $J = 13.5$  Hz, 1H), 3.21 (d,  $J = 13.4$  Hz, 1H), 3.12 – 2.99 (m, 2H), 2.19 (s, 3H);  $^{13}\text{C}$  NMR (101 MHz,  $\text{CDCl}_3$ )  $\delta$  203.6, 178.6, 162.7 (d,  $J = 249.0$  Hz), 159.3 (d,  $J = 3.3$  Hz), 147.8, 137.4, 134.0, 130.7 (d,  $J = 8.0$  Hz), 130.3, 128.9, 128.4, 128.3, 127.6 (d,  $J = 8.3$  Hz), 127.5, 127.3, 126.7, 123.7 (d,  $J = 3.2$  Hz), 120.0 (d,  $J = 21.4$  Hz), 114.9 (d,  $J = 23.9$  Hz), 74.8, 43.2, 36.6, 30.9. HRMS (ESI)  $m/z$ :  $[\text{M} + \text{Na}]^+$  Calcd for  $\text{C}_{27}\text{H}_{22}\text{NaNO}_3$  450.1476; Found: 450.1481.

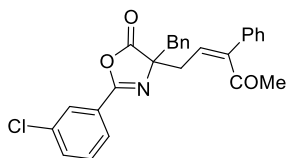

**(Z)-4-benzyl-2-(3-chlorophenyl)-4-(4-oxo-3-phenylpent-2-en-1-yl)oxazol-5(4H)-one (3ai)**

Colourless oil, method A, 36.3 mg, 82% yield; <sup>1</sup>H NMR (600 MHz, CDCl<sub>3</sub>) δ 7.90 – 7.85 (m, 1H), 7.77 – 7.71 (m, 1H), 7.52 – 7.48 (m, 1H), 7.37 (t, *J* = 7.9 Hz, 1H), 7.31 (dd, *J* = 5.1, 2.0 Hz, 3H), 7.22 – 7.11 (m, 7H), 5.79 (t, *J* = 7.7 Hz, 1H), 3.28 (d, *J* = 13.5 Hz, 1H), 3.22 (d, *J* = 13.5 Hz, 1H), 3.10 – 3.01 (m, 2H), 2.19 (s, 3H); <sup>13</sup>C NMR (151 MHz, CDCl<sub>3</sub>) δ 203.6, 178.5, 159.2, 147.8, 137.4, 135.1, 134.0, 132.9, 130.3, 130.2, 128.9, 128.4, 128.3, 127.9, 127.5, 127.4, 127.3, 126.7, 126.0, 74.7, 43.2, 36.7, 30.9. HRMS (ESI) *m/z*: [M + H]<sup>+</sup> Calcd for C<sub>27</sub>H<sub>23</sub>ClNO<sub>3</sub> 444.1361; Found: 444.1362.

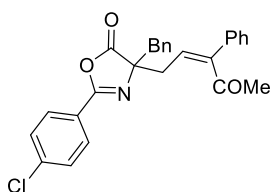

**(Z)-4-benzyl-2-(4-chlorophenyl)-4-(4-oxo-3-phenylpent-2-en-1-yl)oxazol-5(4H)-one (3aj)**

Colourless oil, method B, 35.1 mg, 79% yield; <sup>1</sup>H NMR (400 MHz, CDCl<sub>3</sub>) δ 7.84 – 7.74 (m, 2H), 7.41 (d, *J* = 8.0 Hz, 2H), 7.35 – 7.27 (m, 3H), 7.22 – 7.03 (m, 7H), 5.79 (t, *J* = 7.7 Hz, 1H), 3.27 (d, *J* = 13.4 Hz, 1H), 3.21 (d, *J* = 13.5 Hz, 1H), 3.12 – 3.00 (m, 2H), 2.19 (s, 3H); <sup>13</sup>C NMR (101 MHz, CDCl<sub>3</sub>) δ 203.6, 178.7, 159.5, 147.8, 139.3, 137.4, 134.1, 130.2, 129.3, 129.2, 128.9, 128.4, 128.3, 127.5, 127.3, 126.7, 124.0, 77.5, 43.2, 36.6, 30.9. HRMS (ESI) *m/z*: [M + H]<sup>+</sup> Calcd for C<sub>27</sub>H<sub>23</sub>ClNO<sub>3</sub> 444.1361; Found: 444.1360.

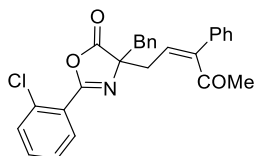

**(Z)-4-benzyl-2-(2-chlorophenyl)-4-(4-oxo-3-phenylpent-2-en-1-yl)oxazol-5(4H)-one (3ak)**

Colourless oil, method B, 22.9 mg, 52% yield; <sup>1</sup>H NMR (400 MHz, CDCl<sub>3</sub>) δ 7.48 – 7.36 (m, 3H), 7.32 (dd, *J* = 5.3, 2.0 Hz, 3H), 7.29 – 7.25 (m, 1H), 7.25 – 7.15 (m, 7H), 5.85 (t, *J* = 7.7 Hz, 1H), 3.36 – 3.23 (m, 2H), 3.11 (d, *J* = 7.7 Hz, 2H), 2.21 (s, 3H); <sup>13</sup>C NMR (101 MHz, CDCl<sub>3</sub>) δ 203.7, 178.8, 159.2, 147.8, 137.3, 134.1, 133.6, 132.9, 131.2, 131.0, 130.4, 128.9, 128.4, 127.6, 127.3, 126.9, 126.6, 125.6, 74.9, 43.3, 36.6, 30.9; HRMS (ESI) *m/z*: [M + H]<sup>+</sup> Calcd for C<sub>27</sub>H<sub>23</sub>ClNO<sub>3</sub> 444.1361; Found: 444.1365.

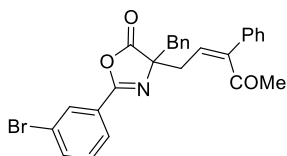

**(Z)-4-benzyl-2-(3-bromophenyl)-4-(4-oxo-3-phenylpent-2-en-1-yl)oxazol-5(4H)-one (3al)**

Colourless oil, method A, 30.5 mg, 63% yield; method B: 26.1 mg, 54% yield; <sup>1</sup>H NMR (600 MHz, CDCl<sub>3</sub>) δ 8.03 (t, *J* = 1.8 Hz, 1H), 7.81 – 7.76 (m, 1H), 7.68 – 7.64 (m, 1H), 7.33 – 7.28 (m, 4H), 7.20 – 7.12 (m, 7H), 5.79 (t, *J* = 7.7 Hz, 1H), 3.28 (d, *J* = 13.5 Hz, 1H), 3.22 (d, *J* = 13.5 Hz,



1H), 3.10 – 3.01 (m, 2H), 2.20 (s, 3H); <sup>13</sup>C NMR (151 MHz, CDCl<sub>3</sub>) δ 203.5, 178.5, 159.1, 147.8, 137.4, 135.8, 134.0, 130.8, 130.5, 130.2, 128.9, 128.4, 128.3, 127.5, 127.4, 127.3, 126.7, 126.5, 123.0, 74.7, 43.2, 36.7, 30.9. HRMS (ESI) m/z: [M + H]<sup>+</sup> Calcd for C<sub>27</sub>H<sub>23</sub>BrNO<sub>3</sub> 488.0856; Found: 488.0857.

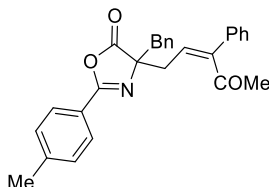

**(Z)-4-benzyl-4-(4-oxo-3-phenylpent-2-en-1-yl)-2-(p-tolyl)oxazol-5(4H)-one (3am)**

Colourless oil, method B, 25.9 mg, 61% yield; <sup>1</sup>H NMR (400 MHz, CDCl<sub>3</sub>) δ 7.68 (d, *J* = 8.0 Hz, 2H), 7.27 – 7.13 (m, 6H), 7.11 – 7.07 (m, 4H), 7.06 – 7.02 (m, 2H), 5.71 (t, *J* = 7.7 Hz, 1H), 3.19 (d, *J* = 13.4 Hz, 1H), 3.12 (d, *J* = 13.4 Hz, 1H), 2.97 (dd, *J* = 7.7, 2.7 Hz, 2H), 2.32 (s, 3H), 2.11 (s, 3H); <sup>13</sup>C NMR (101 MHz, CDCl<sub>3</sub>) δ 203.8, 179.2, 160.4, 147.7, 143.6, 137.4, 134.3, 130.3, 129.6, 128.9, 128.4, 128.3, 127.9, 127.4, 127.3, 126.9, 122.8, 74.6, 43.3, 36.7, 30.9, 21.8. HRMS (ESI) m/z: [M + H]<sup>+</sup> Calcd for C<sub>28</sub>H<sub>26</sub>NO<sub>3</sub> 424.1907; Found: 424.1914.

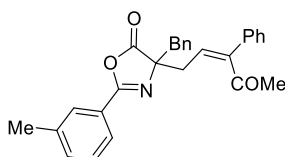

**(Z)-4-benzyl-4-(4-oxo-3-phenylpent-2-en-1-yl)-2-(m-tolyl)oxazol-5(4H)-one (3an)**

Colourless oil, method A, 34.6 mg, 82% yield; method B: 27.5 mg, 65% yield; <sup>1</sup>H NMR (400 MHz, CDCl<sub>3</sub>) δ 7.75 – 7.62 (m, 2H), 7.38 – 7.26 (m, 5H), 7.24 – 7.05 (m, 7H), 5.80 (t, *J* = 7.8 Hz, 1H), 3.28 (d, *J* = 13.5 Hz, 1H), 3.21 (d, *J* = 13.5 Hz, 1H), 3.10 – 3.01 (m, 2H), 2.38 (s, 3H), 2.19 (s, 3H); <sup>13</sup>C NMR (101 MHz, CDCl<sub>3</sub>) δ 203.7, 179.1, 160.5, 147.7, 138.8, 137.4, 134.2, 133.7, 130.3, 128.9, 128.8, 128.4, 128.3, 128.3, 127.4, 127.3, 126.9, 125.5, 125.2, 74.6, 43.3, 36.7, 30.9, 21.4. HRMS (ESI) m/z: [M + H]<sup>+</sup> Calcd for C<sub>28</sub>H<sub>26</sub>NO<sub>3</sub> 424.1907; Found: 424.1919.

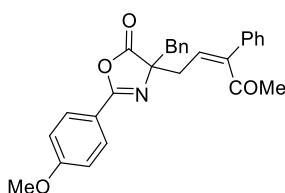

**(Z)-4-benzyl-2-(4-methoxyphenyl)-4-(4-oxo-3-phenylpent-2-en-1-yl)oxazol-5(4H)-one (3ao)**

Colourless oil, method B, 33.4 mg, 76% yield; <sup>1</sup>H NMR (400 MHz, CDCl<sub>3</sub>) δ 7.82 (d, *J* = 8.5 Hz, 2H), 7.34 – 7.26 (m, 3H), 7.22 – 7.08 (m, 7H), 6.92 (d, *J* = 8.5 Hz, 2H), 5.80 (t, *J* = 7.7 Hz, 1H), 3.84 (s, 3H), 3.26 (d, *J* = 13.4 Hz, 1H), 3.19 (d, *J* = 13.4 Hz, 1H), 3.10 – 2.98 (m, 2H), 2.19 (s, 3H); <sup>13</sup>C NMR (101 MHz, CDCl<sub>3</sub>) δ 203.7, 179.2, 163.3, 160.0, 147.6, 137.4, 134.3, 130.3, 129.8, 128.8, 128.3, 128.2, 127.4, 127.3, 126.9, 117.8, 114.3, 74.5, 55.5, 43.3, 36.8, 30.9. HRMS (ESI) m/z: [M + H]<sup>+</sup> Calcd for C<sub>28</sub>H<sub>26</sub>NO<sub>4</sub> 440.1856; Found: 440.1860.

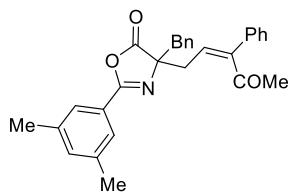

**(Z)-4-benzyl-2-(3,5-dimethylphenyl)-4-(4-oxo-3-phenylpent-2-en-1-yl)oxazol-5(4H)-one (3ap)**

Colourless oil, method A, 36.8 mg, 84% yield; method B: 29.6 mg, 68% yield; <sup>1</sup>H NMR (400 MHz, CDCl<sub>3</sub>) δ 7.51 – 7.47 (m, 2H), 7.32 – 7.27 (m, 3H), 7.21 – 7.14 (m, 6H), 7.14 – 7.10 (m, 2H), 5.79 (t, *J* = 7.7 Hz, 1H), 3.27 (d, *J* = 13.5 Hz, 1H), 3.20 (d, *J* = 13.4 Hz, 1H), 3.05 (d, *J* = 7.7 Hz, 2H), 2.34 (s, 3H), 2.33 (s, 3H), 2.19 (s, 3H); <sup>13</sup>C NMR (101 MHz, CDCl<sub>3</sub>) δ 203.7, 179.1, 160.7, 147.7, 138.6, 137.4, 134.7, 134.2, 130.3, 128.9, 128.4, 128.3, 127.4, 127.3, 126.9, 125.7, 125.4, 74.5, 43.3, 36.8, 30.9, 21.3. HRMS (ESI) *m/z*: [M + H]<sup>+</sup> Calcd for C<sub>29</sub>H<sub>28</sub>NO<sub>3</sub> 438.2064; Found: 438.2072.

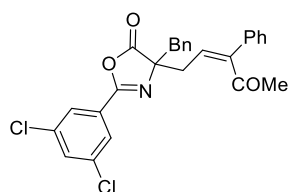

**(Z)-4-benzyl-2-(3,5-dichlorophenyl)-4-(4-oxo-3-phenylpent-2-en-1-yl)oxazol-5(4H)-one (3aq)**

Colourless oil, method B, 30.2 mg, 63% yield; <sup>1</sup>H NMR (400 MHz, CDCl<sub>3</sub>) δ 7.48 (d, *J* = 2.0 Hz, 1H), 7.40 (d, *J* = 8.3 Hz, 1H), 7.37 – 7.32 (m, 3H), 7.32 – 7.25 (m, 2H), 7.25 – 7.18 (m, 6H), 5.84 (t, *J* = 7.7 Hz, 1H), 3.32 (d, *J* = 13.5 Hz, 1H), 3.27 (d, *J* = 13.3 Hz, 1H), 3.12 (d, *J* = 7.7 Hz, 2H), 2.22 (s, 3H); <sup>13</sup>C NMR (101 MHz, CDCl<sub>3</sub>) δ 203.6, 178.5, 158.4, 147.8, 138.7, 137.3, 134.6, 134.0, 132.0, 131.1, 130.3, 128.9, 128.5, 128.4, 127.6, 127.4, 127.3, 126.5, 123.9, 75.0, 43.3, 36.6, 30.9. HRMS (ESI) *m/z*: [M + H]<sup>+</sup> Calcd for C<sub>27</sub>H<sub>22</sub>Cl<sub>2</sub>NO<sub>3</sub> 478.0971; Found: 478.0978.

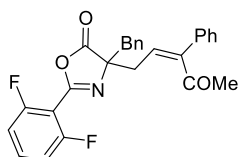

**(Z)-4-benzyl-2-(2,6-difluorophenyl)-4-(4-oxo-3-phenylpent-2-en-1-yl)oxazol-5(4H)-one (3ar)**

Colourless oil, method B, 36.4 mg, 59% yield; <sup>1</sup>H NMR (400 MHz, CDCl<sub>3</sub>) δ 7.43 – 7.34 (m, 1H), 7.30 – 7.23 (m, 3H), 7.18 (d, *J* = 7.0 Hz, 3H), 7.16 – 7.10 (m, 4H), 6.95 – 6.85 (m, 2H), 5.71 (t, *J* = 7.7 Hz, 1H), 3.23 (d, *J* = 13.5 Hz, 1H), 3.18 (d, *J* = 13.5 Hz, 1H), 3.11 – 2.96 (m, 2H), 2.13 (s, 3H); <sup>13</sup>C NMR (101 MHz, CDCl<sub>3</sub>) δ 203.8, 178.3, 161.1 (dd, *J*<sub>1</sub> = 262.6 Hz, *J*<sub>2</sub> = 5.4 Hz), 153.7 (d, *J* = 2.2 Hz), 148.1, 137.3, 133.9 (d, *J* = 10.4 Hz), 133.7, 130.4, 128.9, 128.4, 127.6, 127.4, 126.1, 112.4, 112.3 (d, *J* = 1.8 Hz), 112.2 (d, *J* = 1.6 Hz), 112.1, 74.8, 43.2, 36.5, 30.8. HRMS (ESI) *m/z*: [M + H]<sup>+</sup> Calcd for C<sub>27</sub>H<sub>22</sub>F<sub>2</sub>NO<sub>3</sub> 446.1562; Found: 446.1561.

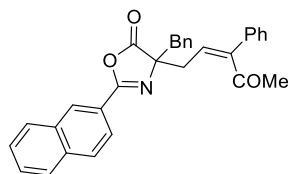

**(Z)-4-benzyl-2-(naphthalen-2-yl)-4-(4-oxo-3-phenylpent-2-en-1-yl)oxazol-5(4H)-one (3as)**

Colourless oil, method A, 34.0 mg, 74% yield;  $^1\text{H NMR}$  (600 MHz,  $\text{CDCl}_3$ )  $\delta$  8.23 (d,  $J = 1.7$  Hz, 1H), 7.95 – 7.89 (m, 1H), 7.84 – 7.74 (m, 3H), 7.52 – 7.47 (m, 1H), 7.47 – 7.42 (m, 1H), 7.19 – 7.15 (m, 3H), 7.14 – 7.10 (m, 2H), 7.09 – 7.00 (m, 5H), 5.75 (t,  $J = 7.7$  Hz, 1H), 3.23 (d,  $J = 13.5$  Hz, 1H), 3.16 (d,  $J = 13.5$  Hz, 1H), 3.07 – 2.96 (m, 2H), 2.12 (s, 3H);  $^{13}\text{C NMR}$  (151 MHz,  $\text{CDCl}_3$ )  $\delta$  203.7, 179.0, 160.4, 147.8, 137.4, 135.4, 134.2, 132.6, 130.3, 129.4, 129.2, 128.9, 128.5, 128.3, 128.3, 128.0, 127.4, 127.3, 127.1, 126.8, 123.5, 122.7, 74.8, 43.4, 36.8, 30.9. HRMS (ESI)  $m/z$ :  $[\text{M} + \text{Na}]^+$  Calcd for  $\text{C}_{31}\text{H}_{25}\text{NaNO}_3$  482.1727; Found: 482.1732.

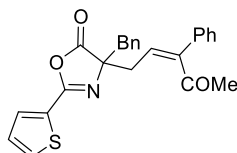

### (Z)-4-benzyl-4-(4-oxo-3-phenylpent-2-en-1-yl)-2-(thiophen-2-yl)oxazol-5(4H)-one (3at)

Colourless oil, method A, 17.3 mg, 42% yield; method B: 20.0 mg, 48% yield;  $^1\text{H NMR}$  (600 MHz,  $\text{CDCl}_3$ )  $\delta$  7.60 – 7.49 (m, 2H), 7.33 – 7.27 (m, 3H), 7.23 – 7.15 (m, 5H), 7.15 – 7.10 (m, 2H), 7.10 – 7.04 (m, 1H), 5.86 – 5.72 (m, 1H), 3.26 (dd,  $J = 13.6, 3.8$  Hz, 1H), 3.20 (dd,  $J = 13.5, 3.8$  Hz, 1H), 3.11 – 3.00 (m, 2H), 2.20 (d,  $J = 3.8$  Hz, 3H);  $^{13}\text{C NMR}$  (151 MHz,  $\text{CDCl}_3$ )  $\delta$  203.7, 178.4, 156.1, 147.8, 137.4, 134.1, 132.0, 131.9, 130.3, 128.9, 128.4, 128.3, 128.2, 128.0, 127.4, 127.3, 126.7, 74.6, 43.3, 36.7, 30.9. HRMS (ESI)  $m/z$ :  $[\text{M} + \text{H}]^+$  Calcd for  $\text{C}_{25}\text{H}_{22}\text{NO}_3\text{S}$  416.1315; Found: 416.1324.

### 3. Scale-up Experiment

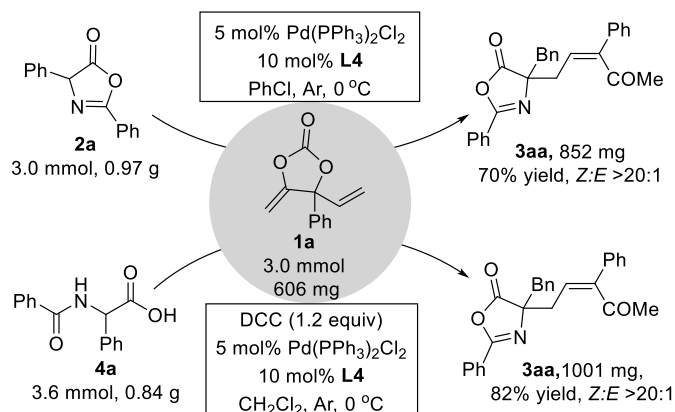

Method A: To a flame dried reaction tube were added  $\text{Pd}(\text{PPh}_3)_2\text{Cl}_2$  (105.3 mg, 5 mol%) and ligand **L4** (174 mg, 10 mol%), followed by addition distilled chlorobenzene (30.0 mL). Then vinyl methylene cyclic carbonate **1a** (3.0 mmol, 606 mg) and azlatone **2a** (3.0 mmol, 970 mg) were added at 0 °C under an argon atmosphere. After completion, the reaction mixture was directly purified by flash chromatography on silica gel (petroleum ether/ethyl acetate = 10:1) to give the corresponding product **3aa** in 70% yield.

Method B: To a flame dried reaction tube were added  $\text{Pd}(\text{PPh}_3)_2\text{Cl}_2$  (105.3 mg, 5 mol%) and ligand **L4** (174 mg, 10 mol%), followed by addition distilled  $\text{CH}_2\text{Cl}_2$  (30.0 mL). Then vinyl methylene cyclic carbonate **1a** (3.0 mmol, 606 mg), *N*-acyl amino acid **4a** (3.6 mmol, 840 mg) and DCC (36 mmol, 1.2 equiv) were added at 0 °C under an argon atmosphere. After completion, the reaction mixture was directly purified by flash chromatography on silica gel (petroleum ether/ethyl acetate = 10:1) to give the corresponding product **3aa** in 82% yield.

### 4. Synthesis of compound 5

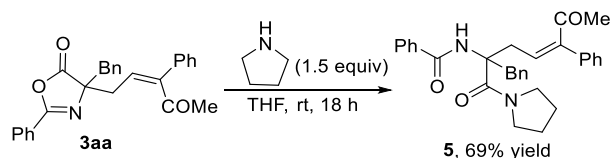

To a sealed tube equipped with compound **3aa** (81.8 mg, 0.2 mmol) in 2 mL THF were added pyrrolidine (21.5 mg, 1.5 equiv). The reaction mixture stirred at room temperature for 18 h. After completion, the resulting mixture was concentrated and the residue was purified by flash chromatography on silica gel (petroleum ether/ethyl acetate = 3:1) to give the corresponding product **5** in 69% yield.

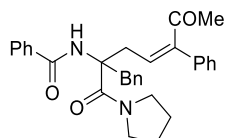

**(Z)-N-(2-benzyl-1,6-dioxo-5-phenyl-1-(pyrrolidin-1-yl)hept-4-en-2-yl)benzamide (5)**

Colourless oil, 66.2 mg, 69% yield;  $^1\text{H NMR}$  (400 MHz,  $\text{CDCl}_3$ )  $\delta$  8.12 (bs, 1H), 7.78 – 7.70 (m, 2H), 7.54 – 7.47 (m, 1H), 7.46 – 7.33 (m, 5H), 7.13 – 7.16 (m, 3H), 7.12 – 7.04 (m, 2H), 6.97 – 6.88 (m, 2H), 6.78 (dd,  $J = 9.3, 4.8$  Hz, 1H), 4.05 – 3.88 (m, 2H), 3.59 – 3.49 (m, 2H), 3.44 (d,  $J = 11.4$  Hz, 1H), 3.10 (d,  $J = 14.4$  Hz, 1H), 2.89 (dd,  $J = 16.3, 9.2$  Hz, 1H), 2.84 – 2.72 (m, 1H), 2.23 (s, 3H), 1.88 – 1.70 (m, 4H);  $^{13}\text{C NMR}$  (101 MHz,  $\text{CDCl}_3$ )  $\delta$  198.4, 168.8, 166.4, 144.5, 138.0, 135.9, 135.4, 135.3, 131.6, 129.8, 129.4, 128.7, 128.4, 128.3, 128.0, 127.1, 127.0, 65.3, 38.0, 33.7, 27.2. HRMS (ESI)  $m/z$ :  $[\text{M} + \text{H}]^+$  Calcd for  $\text{C}_{31}\text{H}_{33}\text{N}_2\text{O}_3$  481.2486; Found: 481.2469.

**5. Synthesis of compound 6**

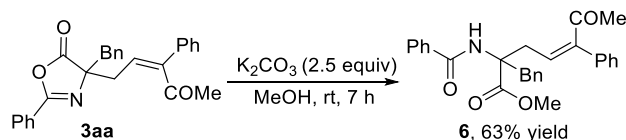

To a sealed tube equipped with compound **3aa** (81.8 mg, 0.2 mmol) in 2 mL MeOH were added  $\text{K}_2\text{CO}_3$  (69 mg, 2.5 equiv). The reaction mixture stirred at room temperature for 7 h. After completion, the resulting mixture was concentrated and the residue was purified by flash chromatography on silica gel (petroleum ether/ethyl acetate = 5:1) to give the corresponding product **6** in 63% yield.

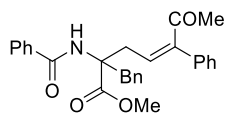

**methyl (Z)-2-benzamido-2-benzyl-6-oxo-5-phenylhept-4-enoate (6)**

white solid, 55.6 mg, 63% yield; m.p. 89.1-90.1  $^\circ\text{C}$ ;  $^1\text{H NMR}$  (400 MHz,  $\text{CDCl}_3$ )  $\delta$  7.68 – 7.59 (m, 2H), 7.48 – 7.41 (m, 1H), 7.40 – 7.27 (m, 5H), 7.11 – 7.06 (m, 3H), 6.98 (d,  $J = 7.3$  Hz, 2H), 6.93 (s, 1H), 6.87 (dd,  $J = 6.8, 2.7$  Hz, 2H), 6.71 – 6.62 (m, 1H), 3.79 (dd,  $J = 13.5, 2.0$  Hz, 1H), 3.65 (s, 3H), 3.64 – 3.55 (m, 1H), 2.98 (d,  $J = 13.5$  Hz, 1H), 2.82 – 2.71 (m, 1H), 2.10 (s, 3H);  $^{13}\text{C NMR}$  (101 MHz,  $\text{CDCl}_3$ )  $\delta$  198.4, 173.0, 167.0, 145.3, 136.6, 135.7, 135.6, 134.9, 131.9, 129.7, 129.5, 128.8, 128.5, 128.4, 127.9, 127.2, 127.0, 65.7, 53.0, 40.5, 35.6, 27.6. HRMS (ESI)  $m/z$ :  $[\text{M} + \text{H}]^+$  Calcd for  $\text{C}_{28}\text{H}_{28}\text{NO}_4$  442.2013; Found: 442.2018.

**6. Synthesis of compound 7**

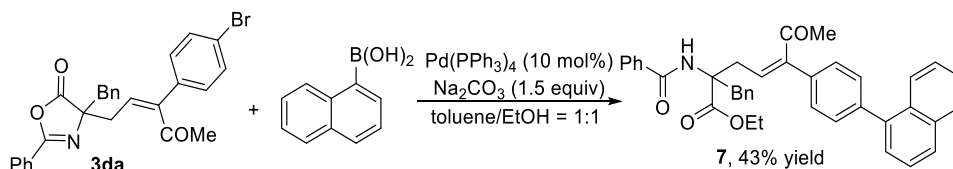

Under argon atmosphere, compound **3da** (48.8 mg, 0.1 mmol), naphthalen-1-ylboronic acid (20.6 mg, 1.2 equiv), Na<sub>2</sub>CO<sub>3</sub> (15.9 mg, 1.5 equiv), and Pd(PPh<sub>3</sub>)<sub>4</sub> (5.7 mg, 10 mol%) were successively added to mixed solvents of toluene (1.5 mL) and EtOH (1.5 mL). The resulting mixture was stirred at reflux for 20 h. The reaction mixture was directly subjected to flash column chromatography on silica gel (petroleum ether/ethyl acetate = 3:1) to afford the corresponding products **7** in 43% yield.

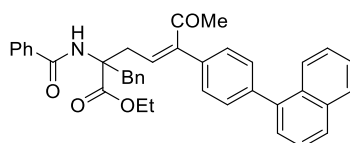

#### ethyl (Z)-2-benzamido-2-benzyl-5-(4-(naphthalen-1-yl)phenyl)-6-oxohept-4-enoate (**7**)

Colourless oil, 25.1 mg, 43% yield; <sup>1</sup>H NMR (600 MHz, CDCl<sub>3</sub>) δ 7.89 – 7.78 (m, 2H), 7.78 – 7.68 (m, 3H), 7.55 (d, *J* = 7.5 Hz, 1H), 7.51 – 7.38 (m, 3H), 7.37 – 7.29 (m, 3H), 7.21 – 7.11 (m, 6H), 7.08 – 6.94 (m, 4H), 5.69 (t, *J* = 7.7 Hz, 1H), 4.18 (q, *J* = 7.1 Hz, 2H), 3.76 (d, *J* = 13.6 Hz, 1H), 3.51 (dd, *J* = 15.1, 8.0 Hz, 1H), 3.36 (d, *J* = 13.6 Hz, 1H), 2.91 (dd, *J* = 15.1, 7.4 Hz, 1H), 2.07 (s, 3H), 1.24 (t, *J* = 7.1 Hz, 3H); <sup>13</sup>C NMR (101 MHz, CDCl<sub>3</sub>) δ 203.8, 172.9, 167.1, 146.5, 141.4, 139.3, 137.5, 136.2, 135.4, 133.9, 133.4, 131.5, 130.1, 128.9, 128.8, 128.7, 128.6, 128.5, 128.4, 128.2, 128.1, 127.3, 127.2, 127.1, 126.4, 126.0, 125.9, 125.8, 125.5, 65.2, 62.4, 40.3, 35.9, 30.7, 14.3. HRMS (ESI) *m/z*: [M + H]<sup>+</sup> Calcd for C<sub>39</sub>H<sub>36</sub>NO<sub>4</sub> 582.2639; Found: 582.2643.

### 7. The preliminary attempt to the asymmetric decarboxylative allylation

In a flame dried reaction tube were added Pd<sub>2</sub>(dba)<sub>3</sub>·CHCl<sub>3</sub> (5.0 mg, 5 mol%) and ligand **L\*** (10 mol%). Then, distilled chlorobenzene (0.3 mL) was added and stirred for 30 minutes at rt. Vinyl methylene cyclic carbonate **1a** (0.1 mmol, 20.2 mg) and azlatone **2a** (0.1 mmol, 25.1 mg) were added under an argon atmosphere. After completion, the reaction mixture was directly purified by flash chromatography on silica gel (petroleum ether/ethyl acetate = 10:1) to give the corresponding product **3aa** (The ee was determined by HPLC (Chiralpak AD-H, EtOH/hexane = 10/90, flow rate 1.0 mL/min, λ = 254 nm)).

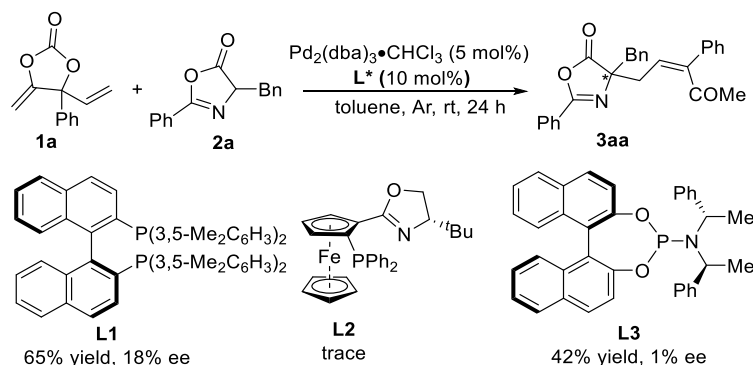

### 8. X-Ray crystal data for compound **3ja**

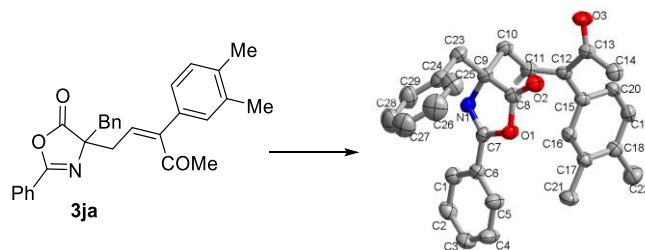

ORTEP of **3ja** (at 50% level)

|                                                                     |                                                               |
|---------------------------------------------------------------------|---------------------------------------------------------------|
| Crystal data and structure refinement for <b>3ja</b> (CCDC-2184568) |                                                               |
| Identification code                                                 | 202112381                                                     |
| Empirical formula                                                   | C <sub>29</sub> H <sub>27</sub> NO <sub>3</sub>               |
| Formula weight                                                      | 437.51                                                        |
| Temperature/K                                                       | 293(2)                                                        |
| Crystal system                                                      | orthorhombic                                                  |
| Space group                                                         | Pna2 <sub>1</sub>                                             |
| a/Å                                                                 | 8.29455(17)                                                   |
| b/Å                                                                 | 18.4338(4)                                                    |
| c/Å                                                                 | 16.1206(3)                                                    |
| α/°                                                                 | 90                                                            |
| β/°                                                                 | 90                                                            |
| γ/°                                                                 | 90                                                            |
| Volume/Å <sup>3</sup>                                               | 2464.84(9)                                                    |
| Z                                                                   | 4                                                             |
| ρ <sub>calc</sub> /cm <sup>3</sup>                                  | 1.179                                                         |
| μ/mm <sup>-1</sup>                                                  | 0.602                                                         |
| F(000)                                                              | 928.0                                                         |
| Crystal size/mm <sup>3</sup>                                        | 0.14 × 0.1 × 0.09                                             |
| Radiation                                                           | CuKα (λ = 1.54184)                                            |
| 2θ range for data collection/°                                      | 7.284 to 134.144                                              |
| Index ranges                                                        | -6 ≤ h ≤ 9, -21 ≤ k ≤ 22, -11 ≤ l ≤ 19                        |
| Reflections collected                                               | 8291                                                          |
| Independent reflections                                             | 3209 [R <sub>int</sub> = 0.0325, R <sub>sigma</sub> = 0.0374] |
| Data/restraints/parameters                                          | 3209/1/301                                                    |
| Goodness-of-fit on F <sup>2</sup>                                   | 1.035                                                         |
| Final R indexes [I ≥ 2σ (I)]                                        | R <sub>1</sub> = 0.0405, wR <sub>2</sub> = 0.1004             |
| Final R indexes [all data]                                          | R <sub>1</sub> = 0.0500, wR <sub>2</sub> = 0.1106             |
| Largest diff. peak/hole / e Å <sup>-3</sup>                         | 0.09/-0.14                                                    |
| Flack parameter                                                     | 0.3(3)                                                        |







$^1\text{H}$ ,  $^{13}\text{C}$  NMR of compound **3ca**

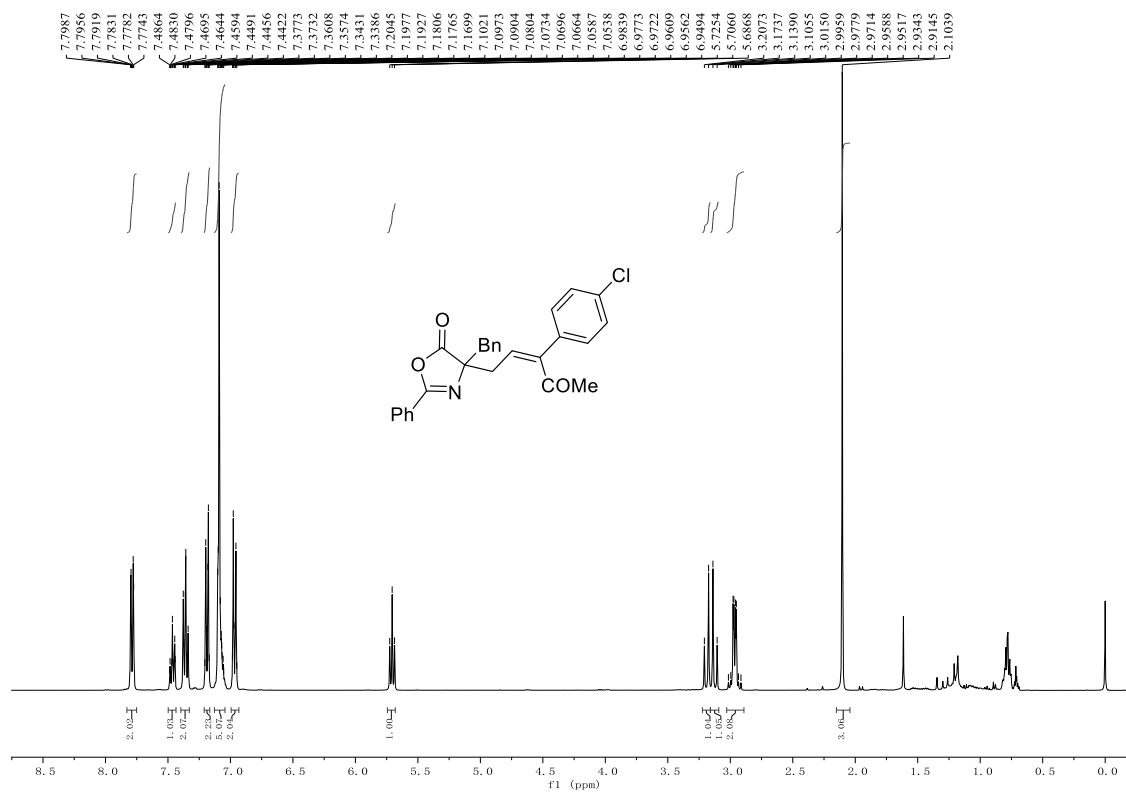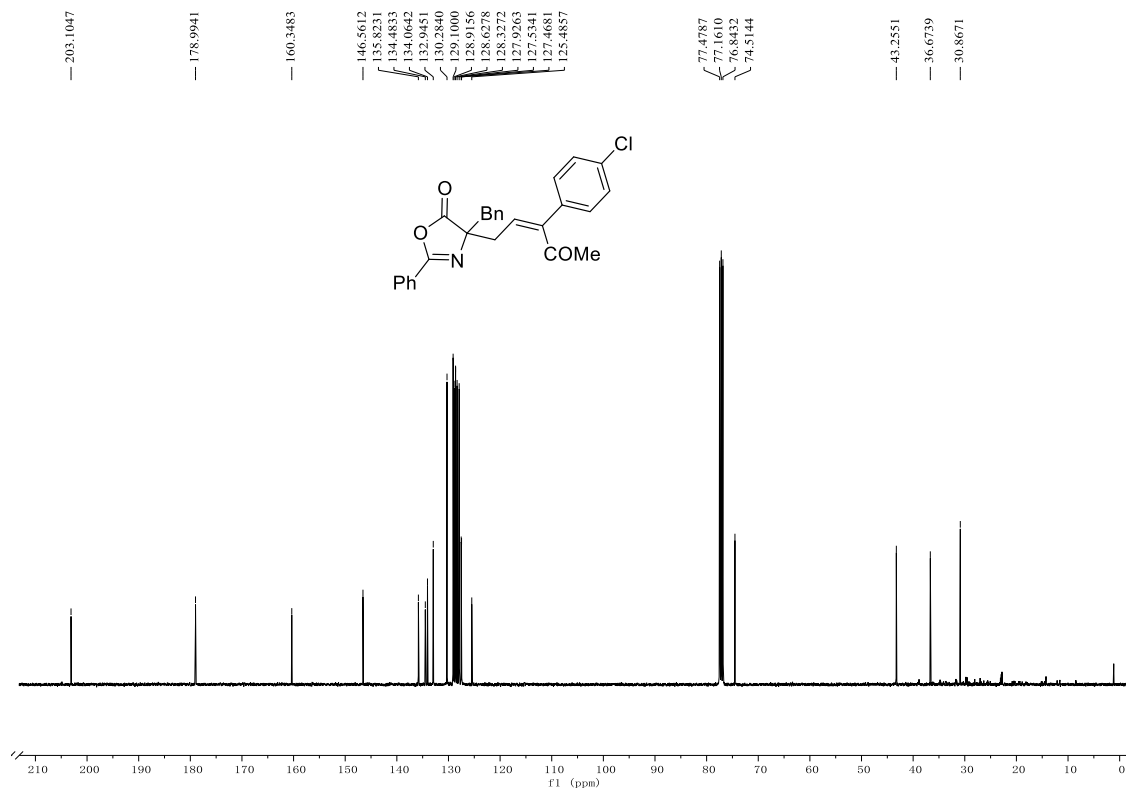

$^1\text{H}$ ,  $^{13}\text{C}$  NMR of compound **3da**

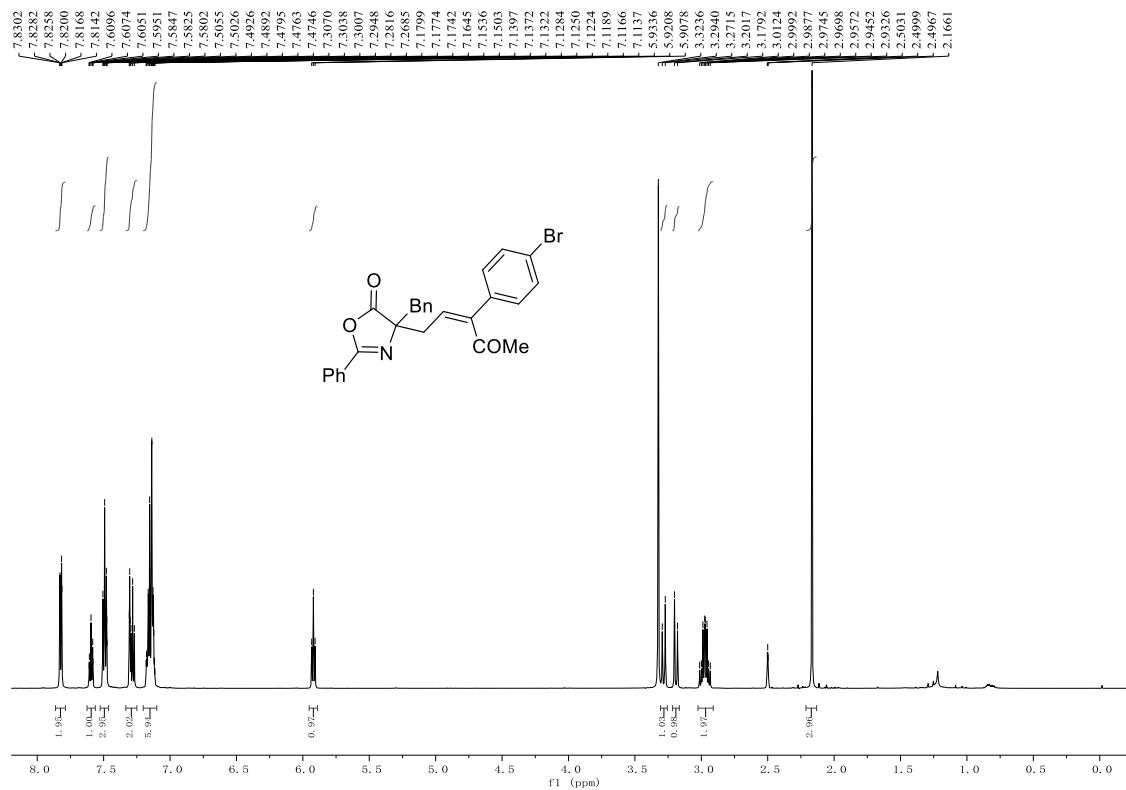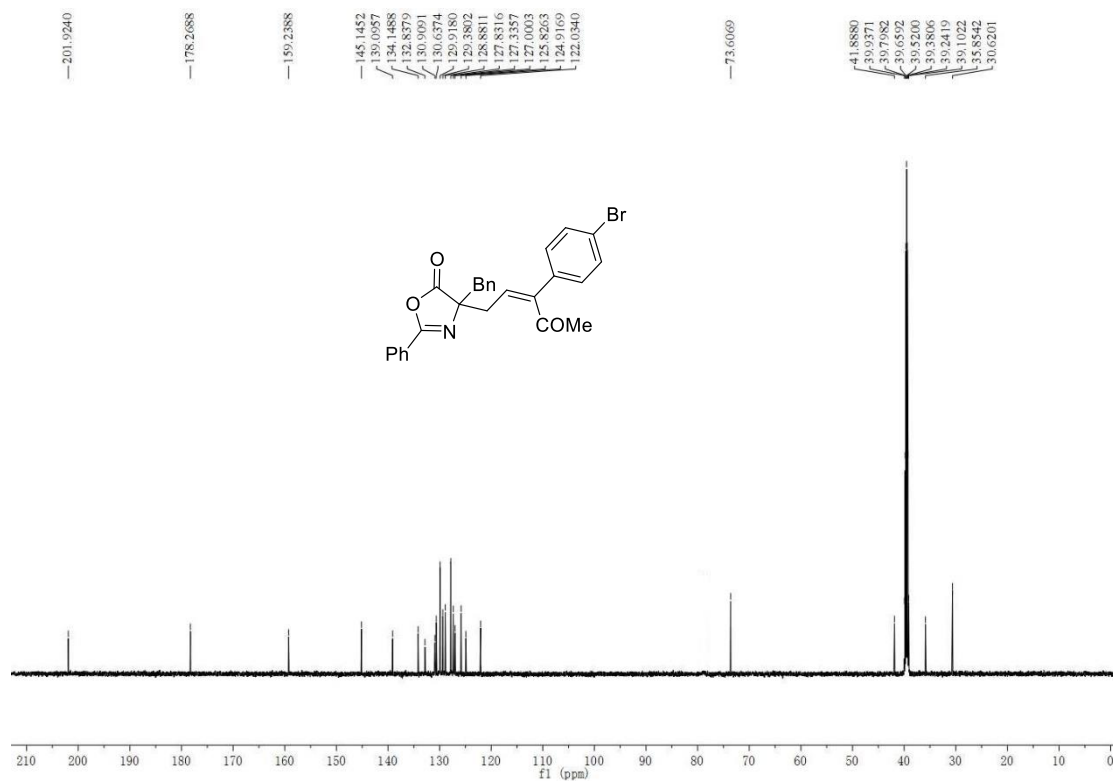

$^1\text{H}$ ,  $^{13}\text{C}$  NMR of compound **3ea**

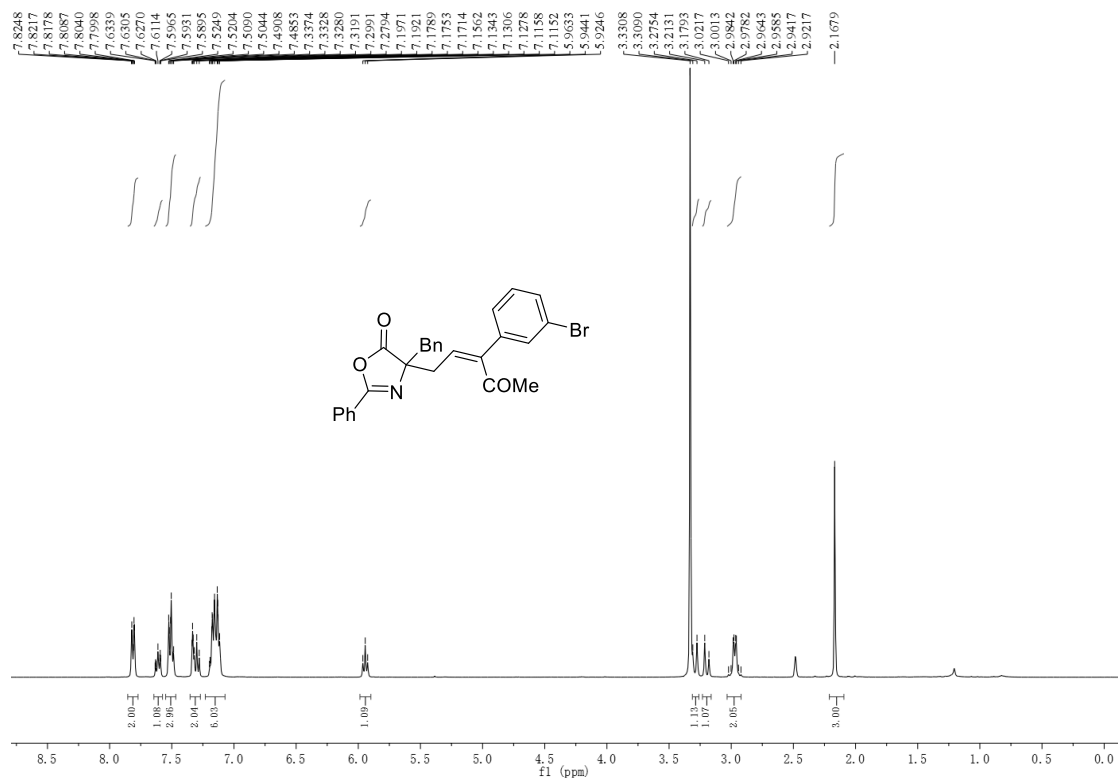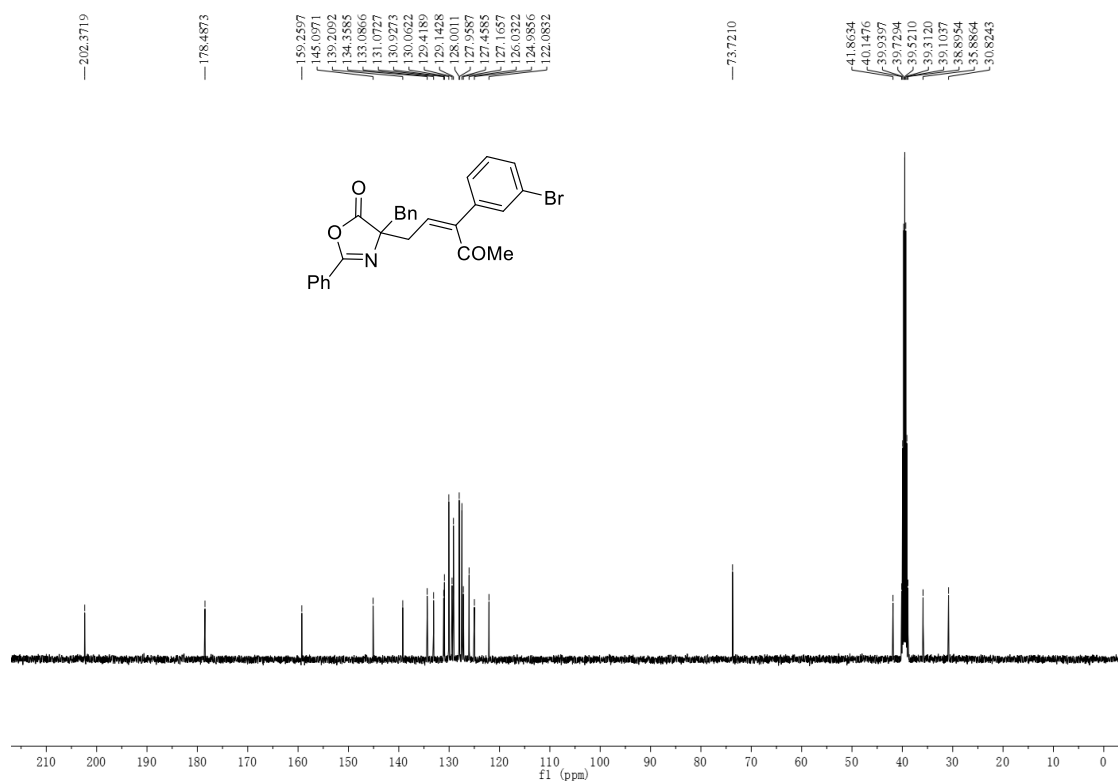

$^1\text{H}$ ,  $^{13}\text{C}$  NMR of compound **3fa**

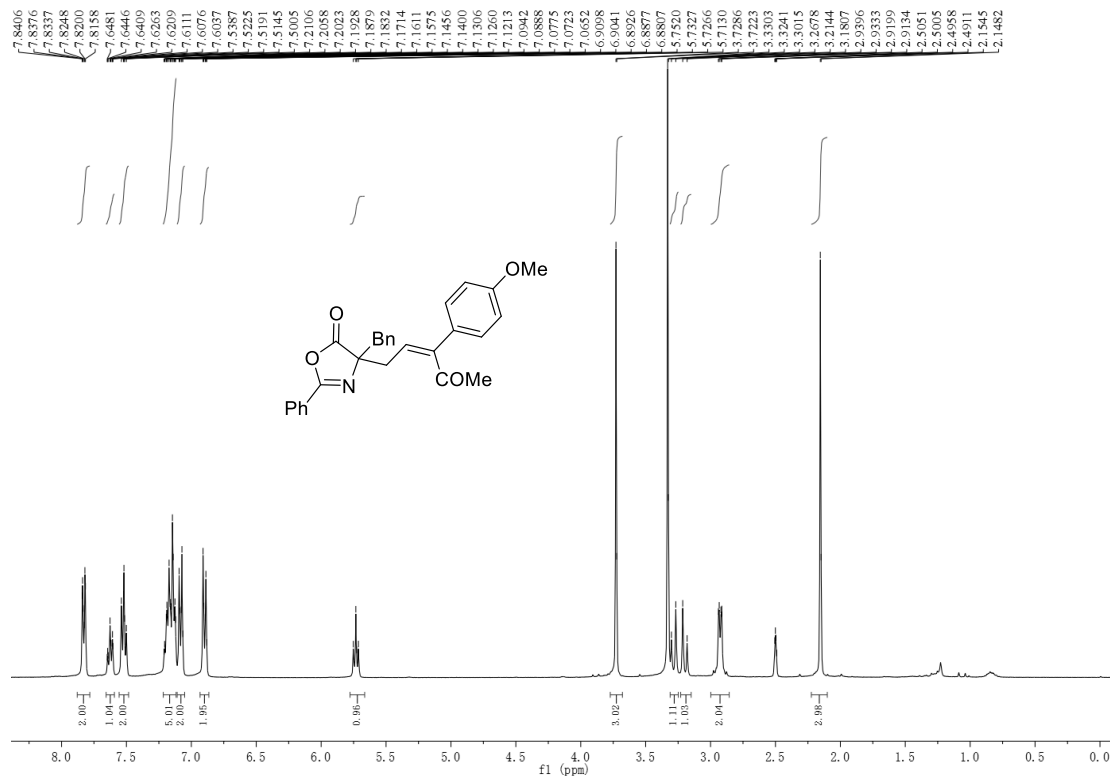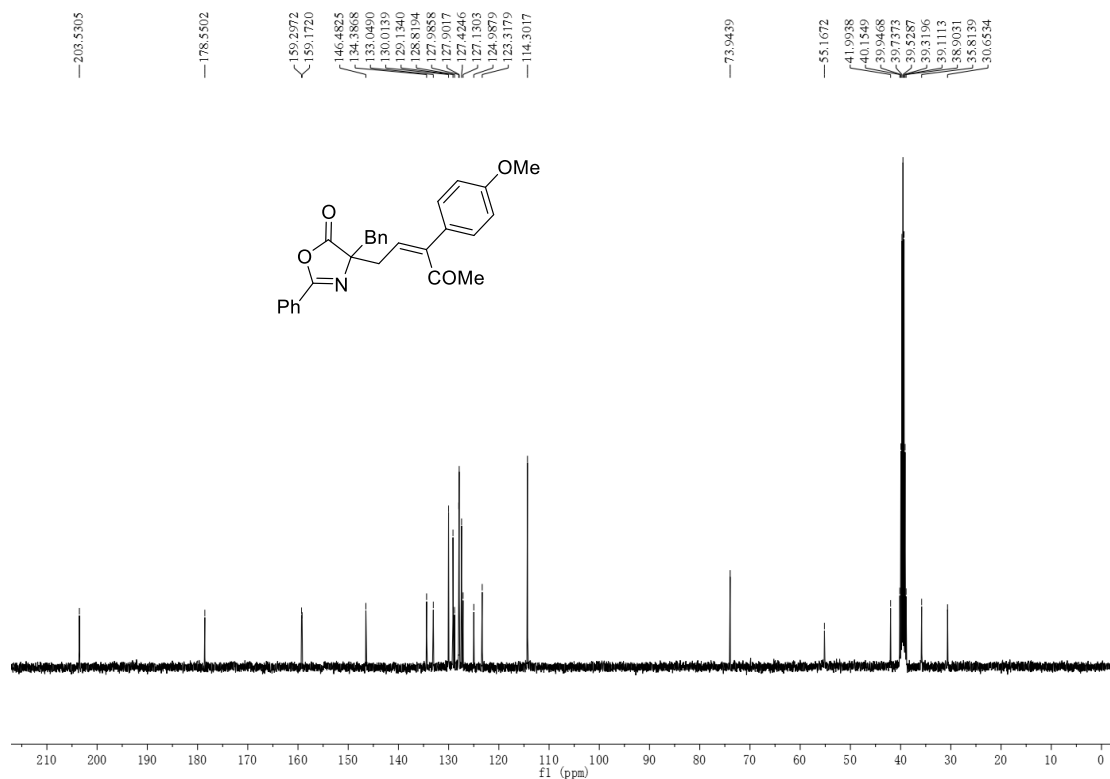

# <sup>1</sup>H, <sup>13</sup>C NMR of compound **3ga**

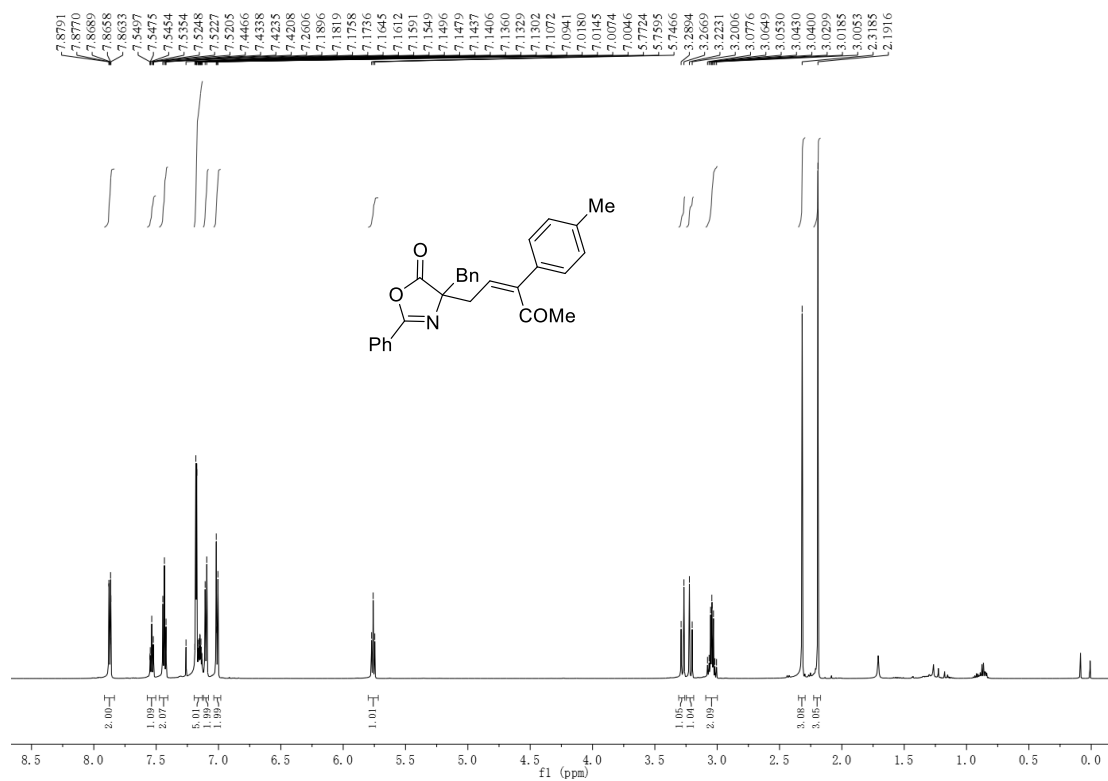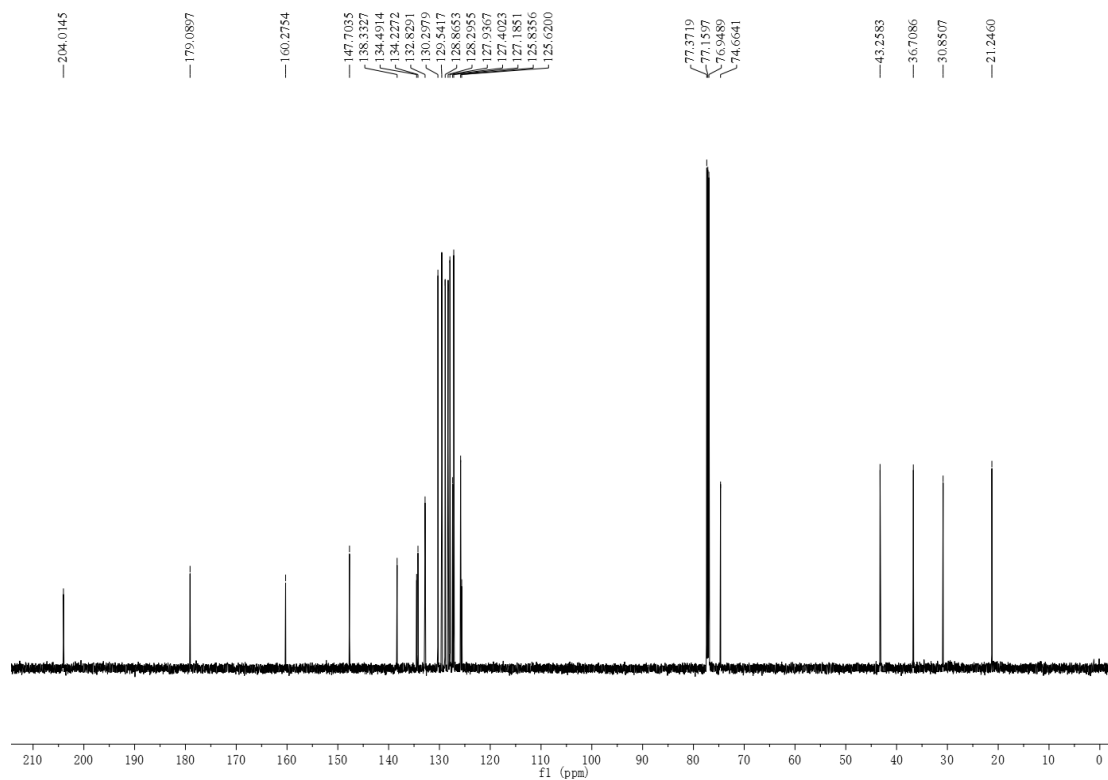

$^1\text{H}$ ,  $^{13}\text{C}$  NMR of compound **3ha**

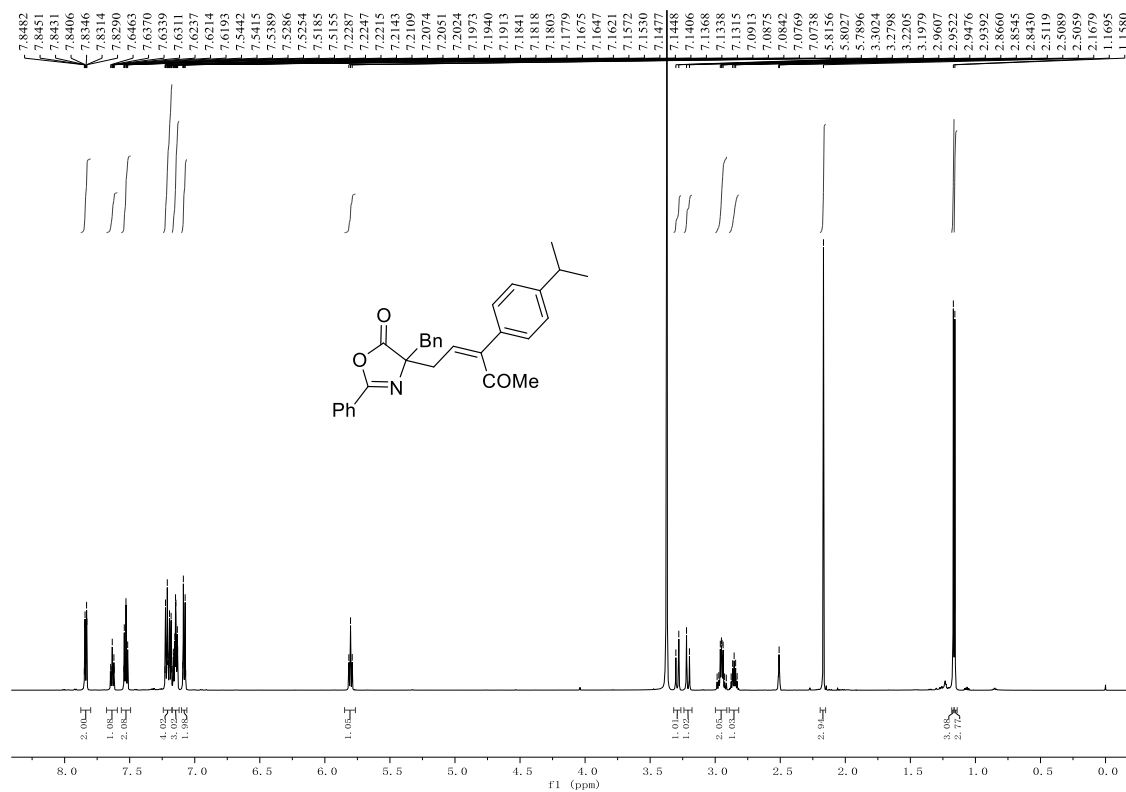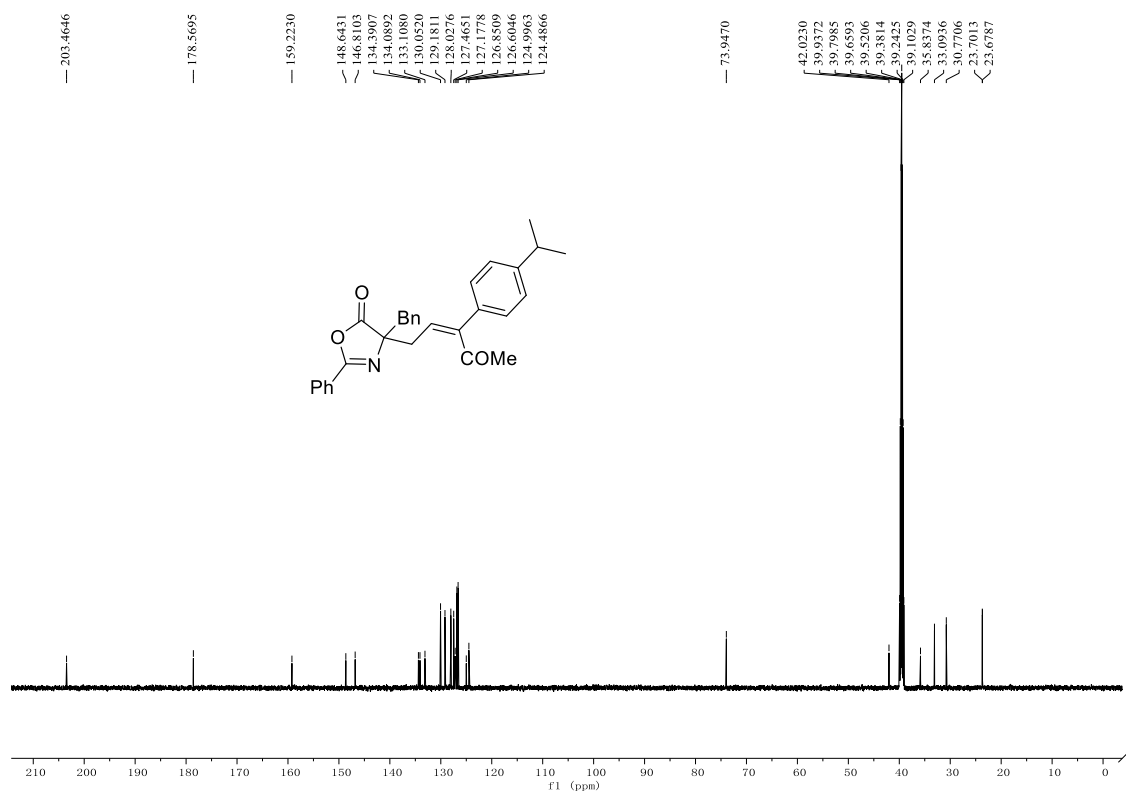

$^1\text{H}$ ,  $^{13}\text{C}$  NMR of compound **3ia**

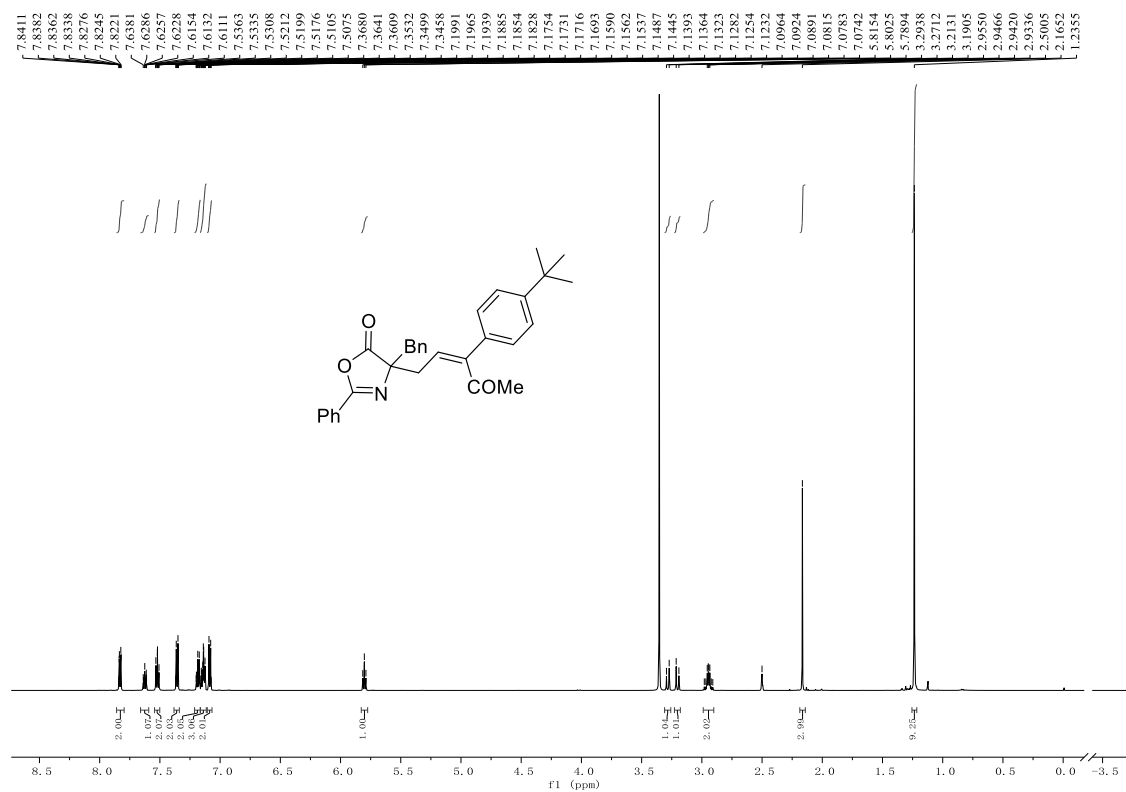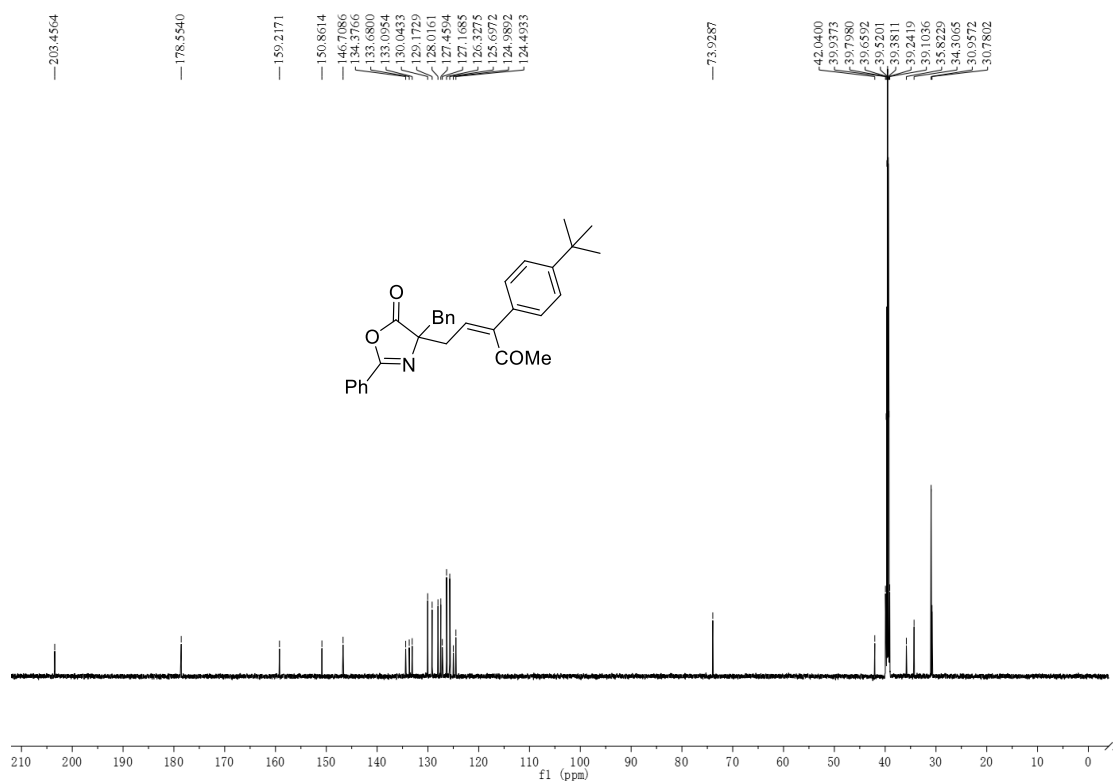

<sup>1</sup>H, <sup>13</sup>C NMR of compound **3ja**

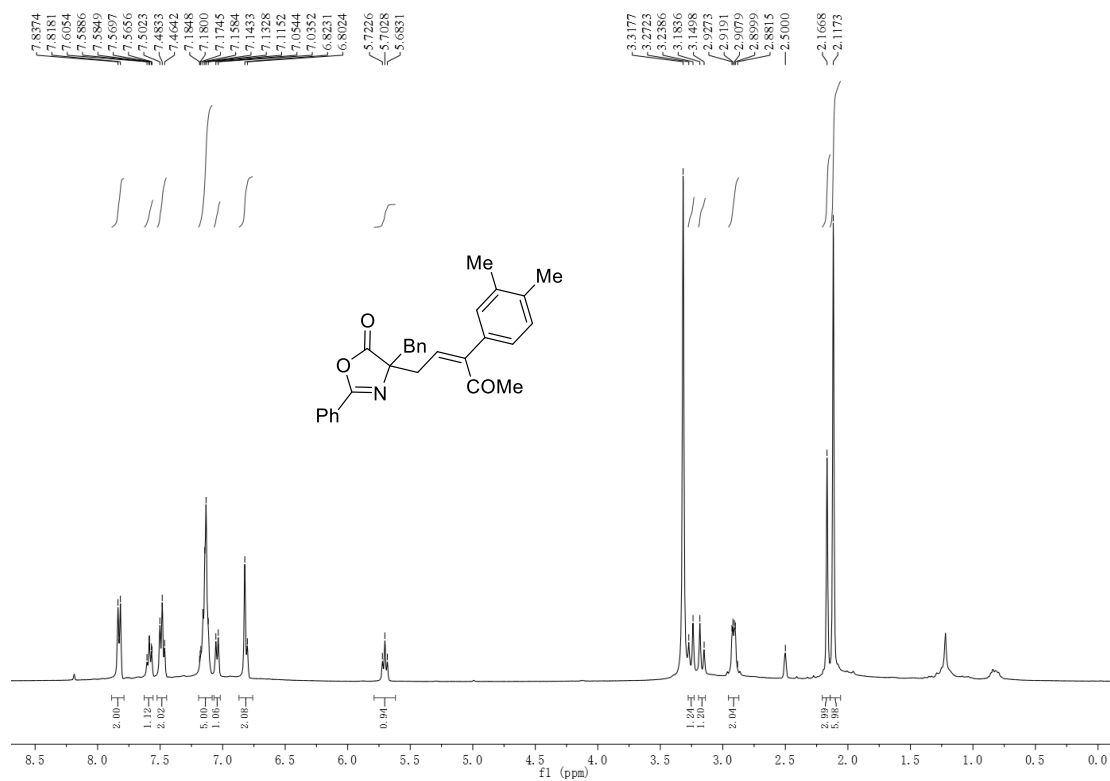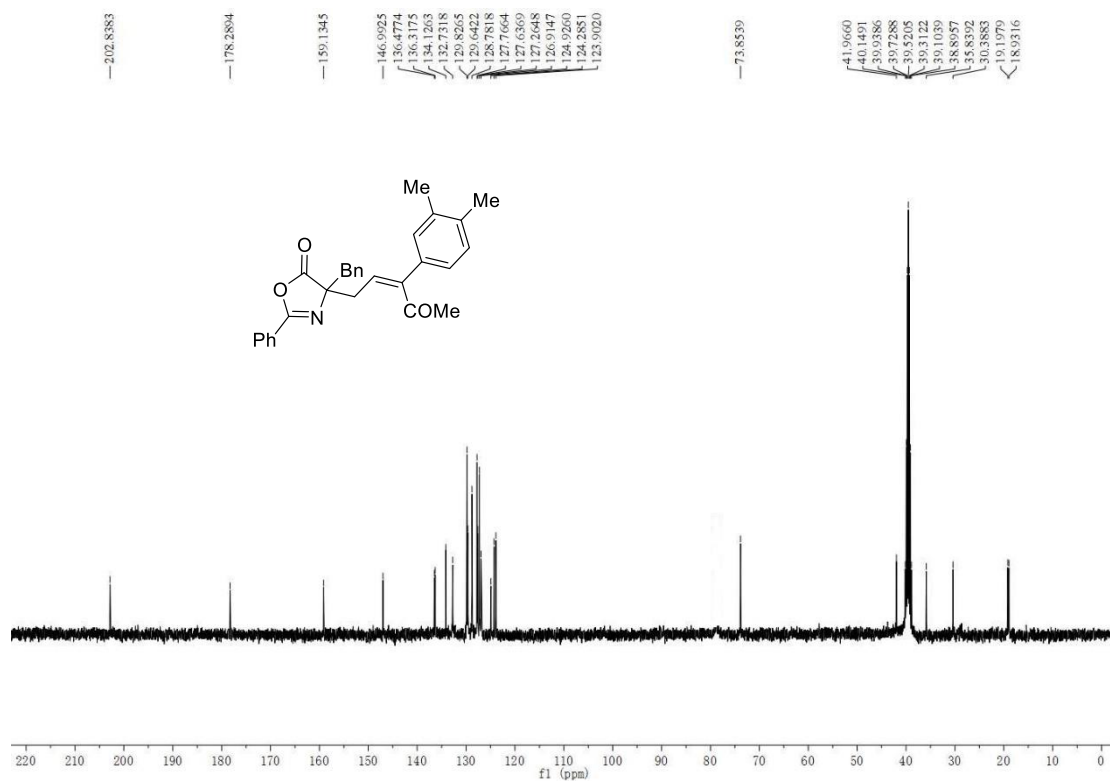



# $^1\text{H}$ , $^{13}\text{C}$ NMR of compound **3ka**

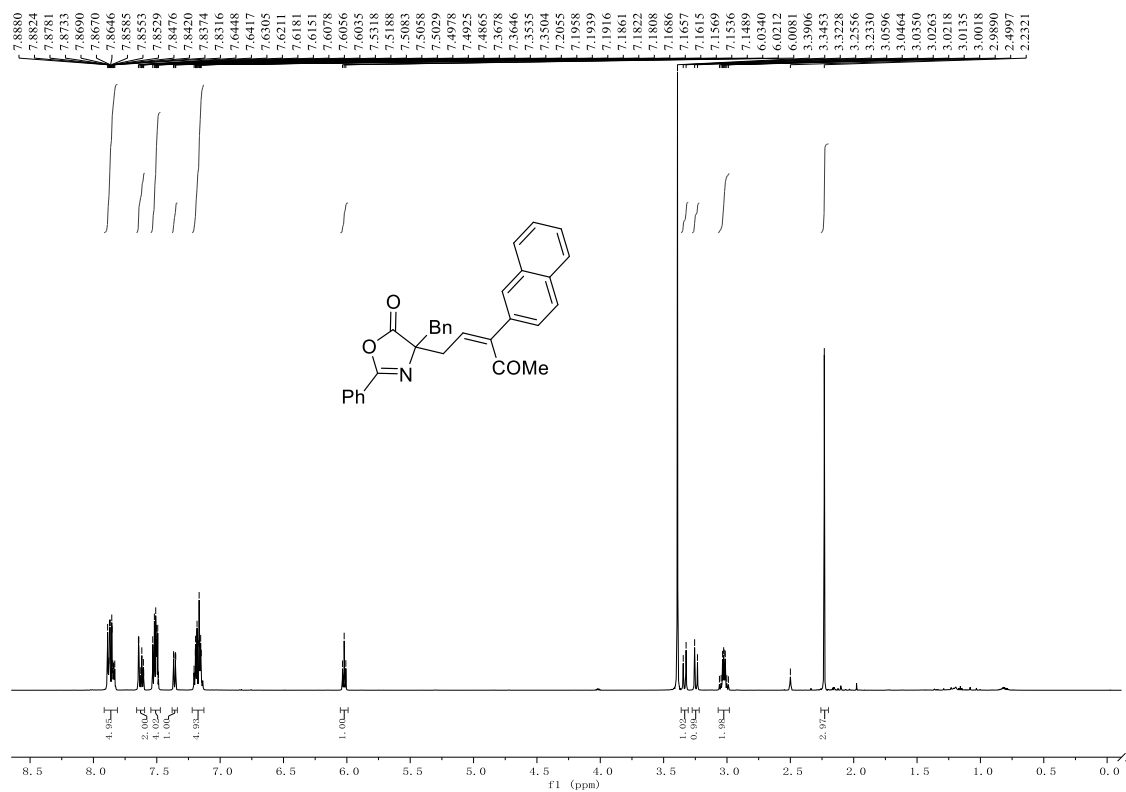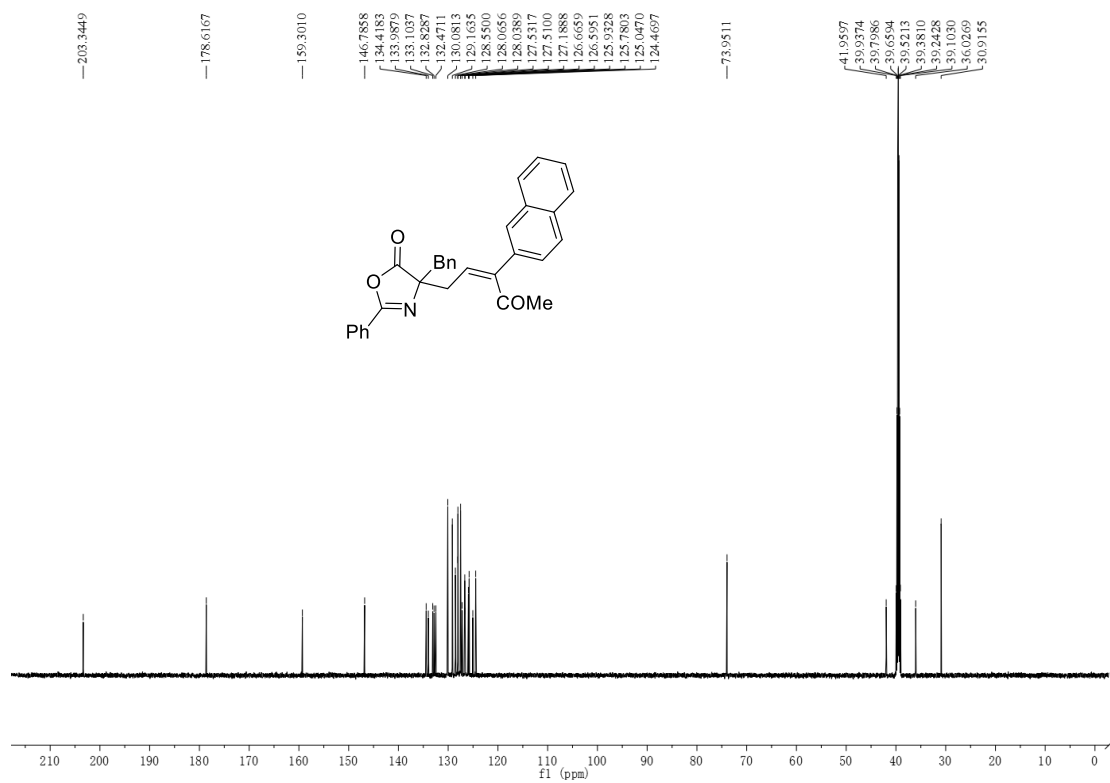

<sup>1</sup>H, <sup>13</sup>C NMR of compound **3la**

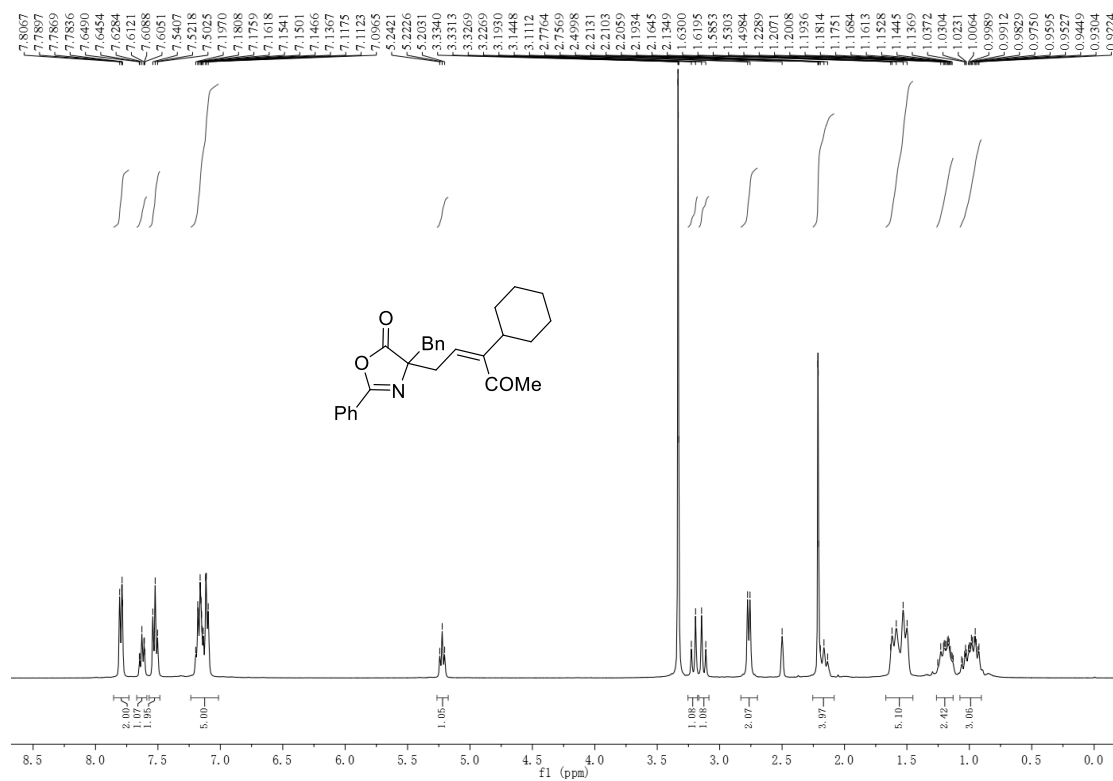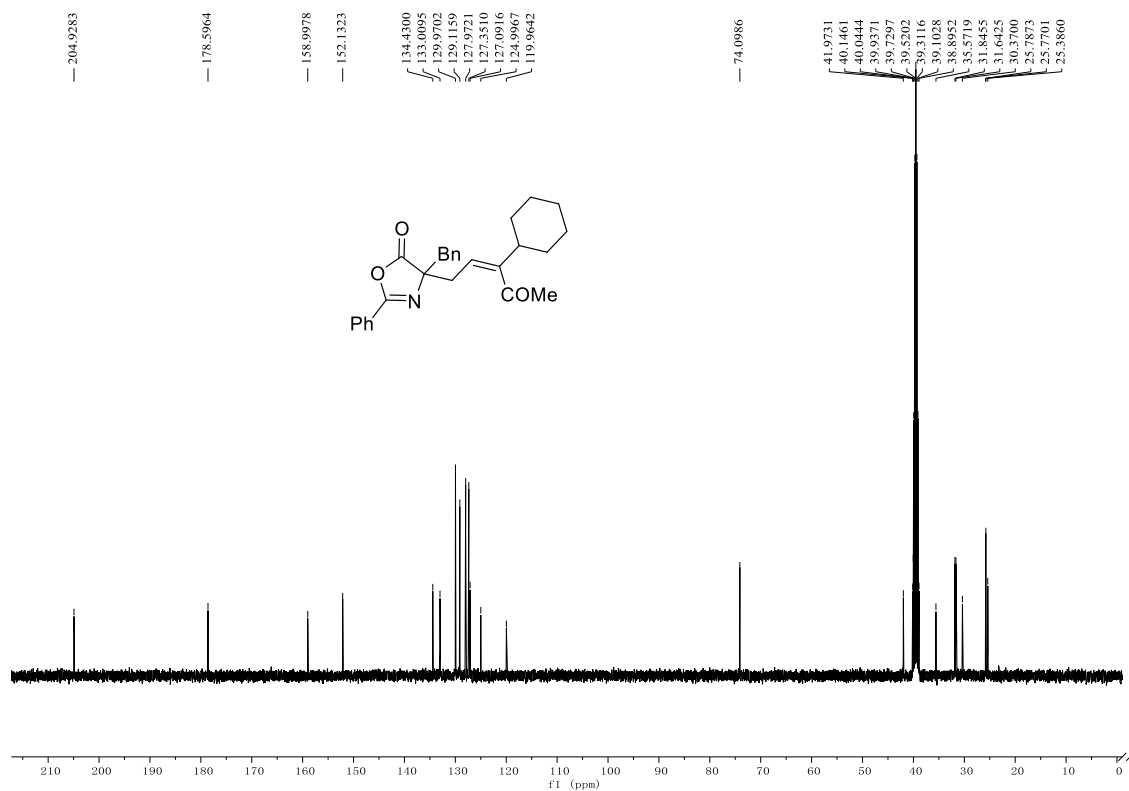

<sup>1</sup>H, <sup>13</sup>C NMR of compound **3ab**

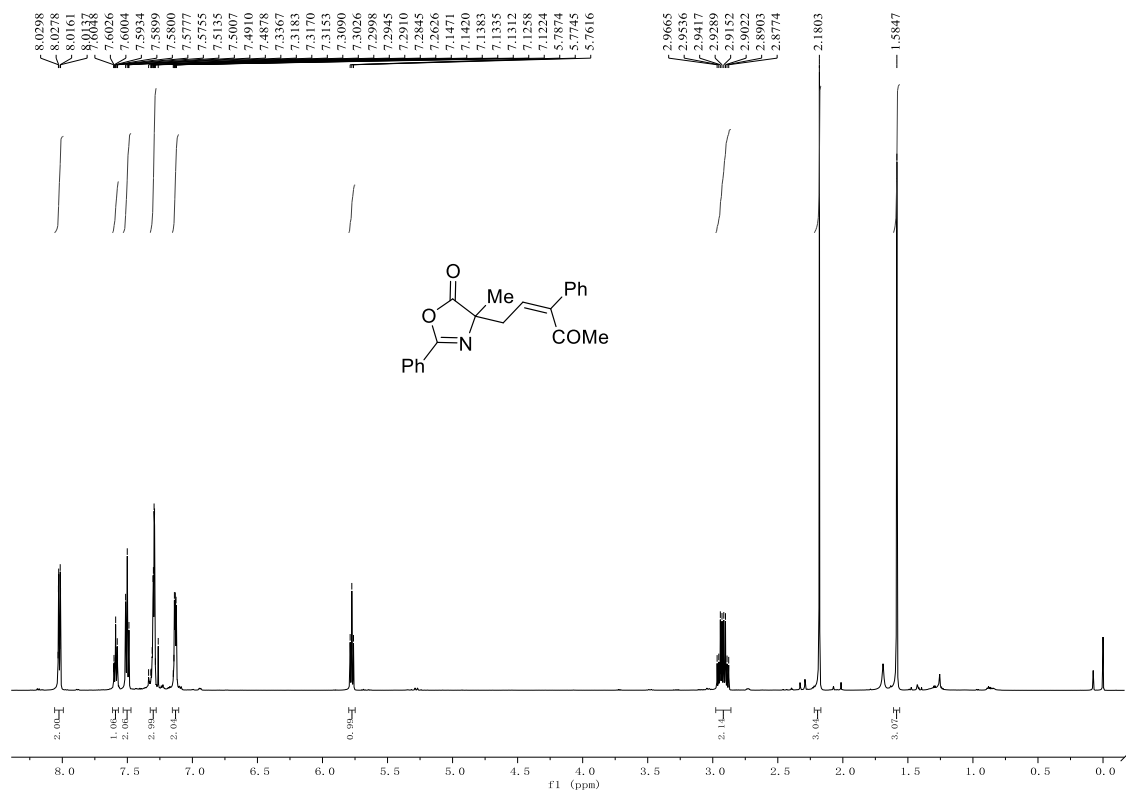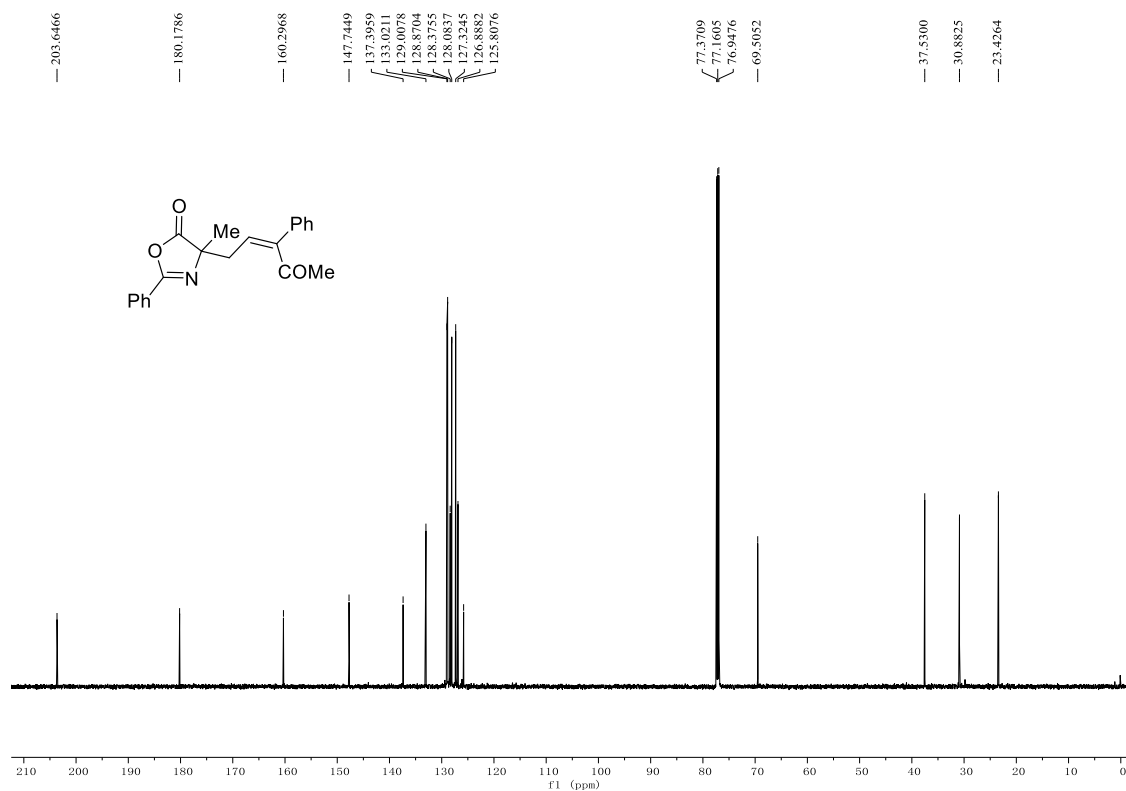

<sup>1</sup>H, <sup>13</sup>C NMR of compound **3ac**

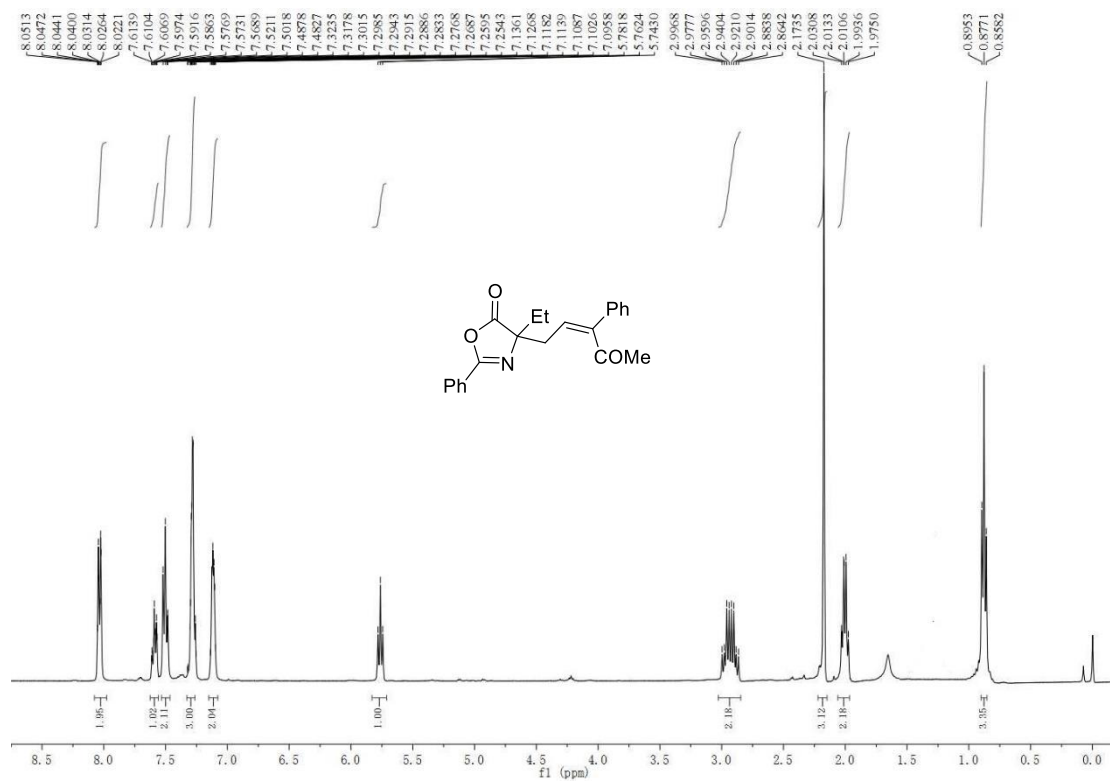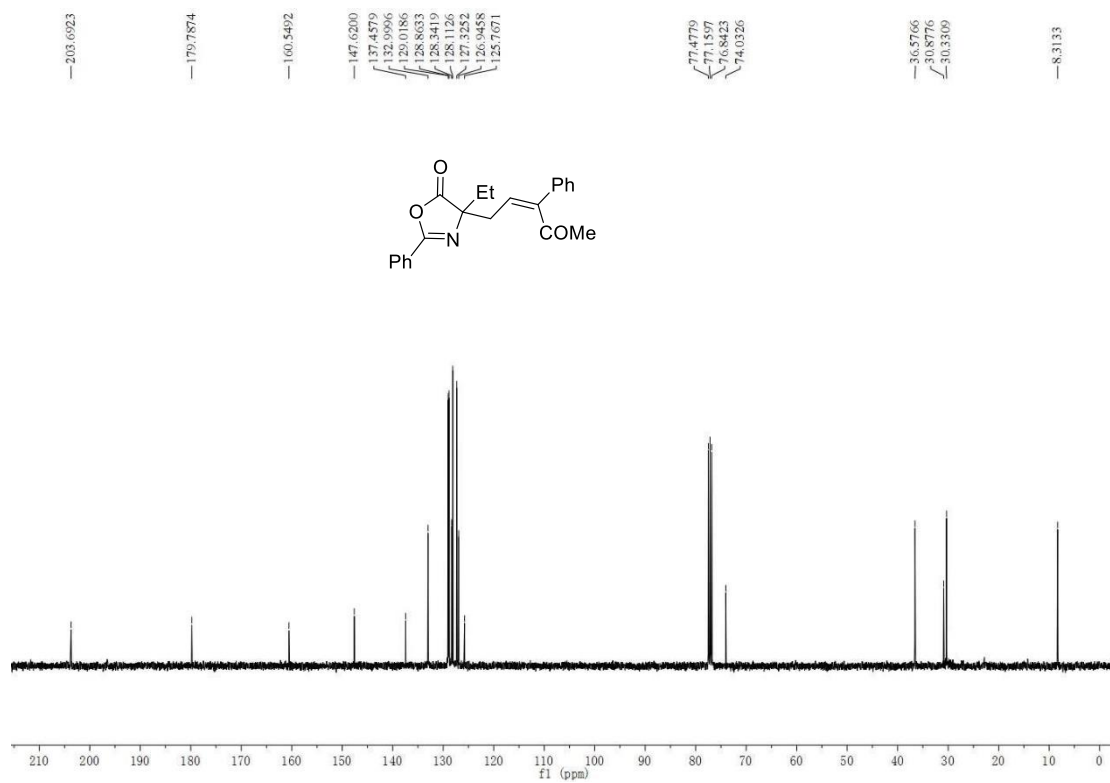



<sup>1</sup>H, <sup>13</sup>C NMR of compound **3ae**

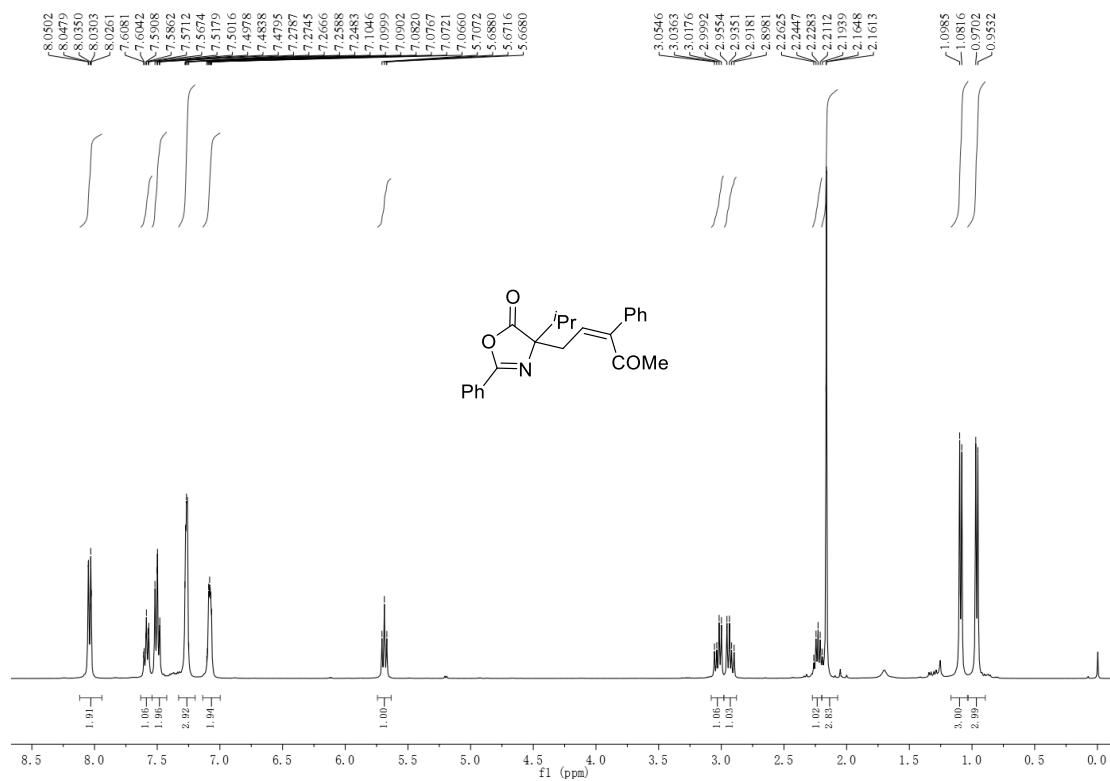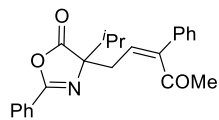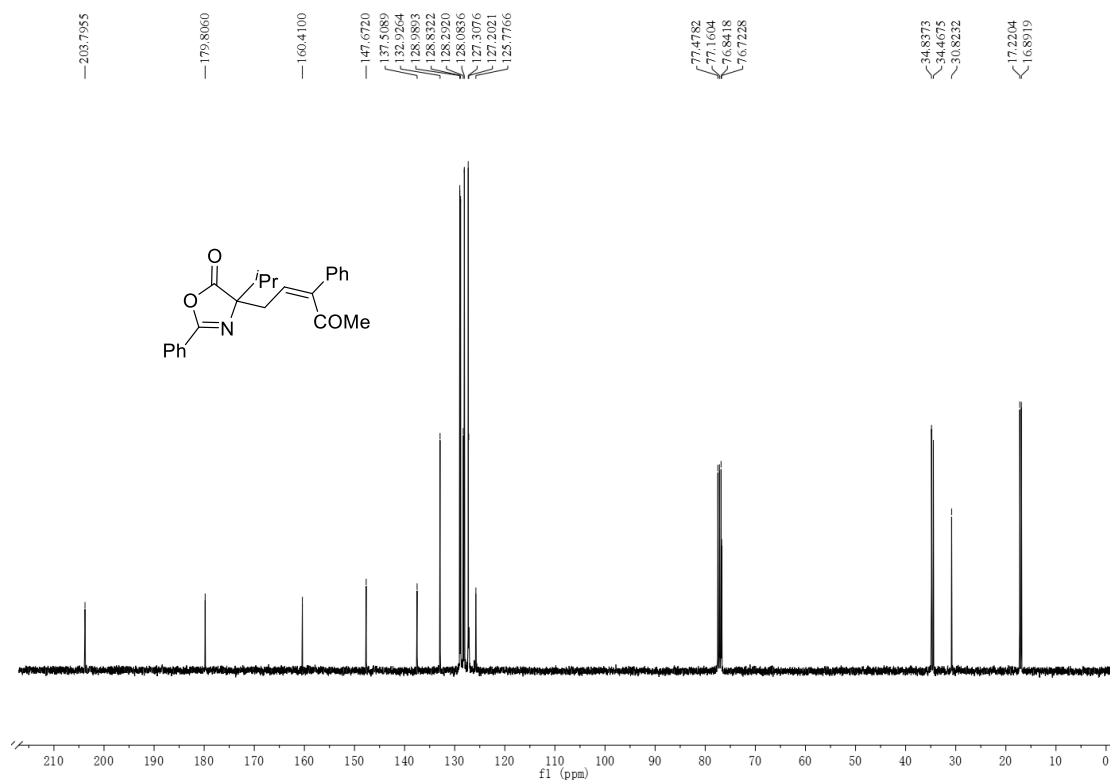

<sup>1</sup>H, <sup>13</sup>C NMR of compound **3af**

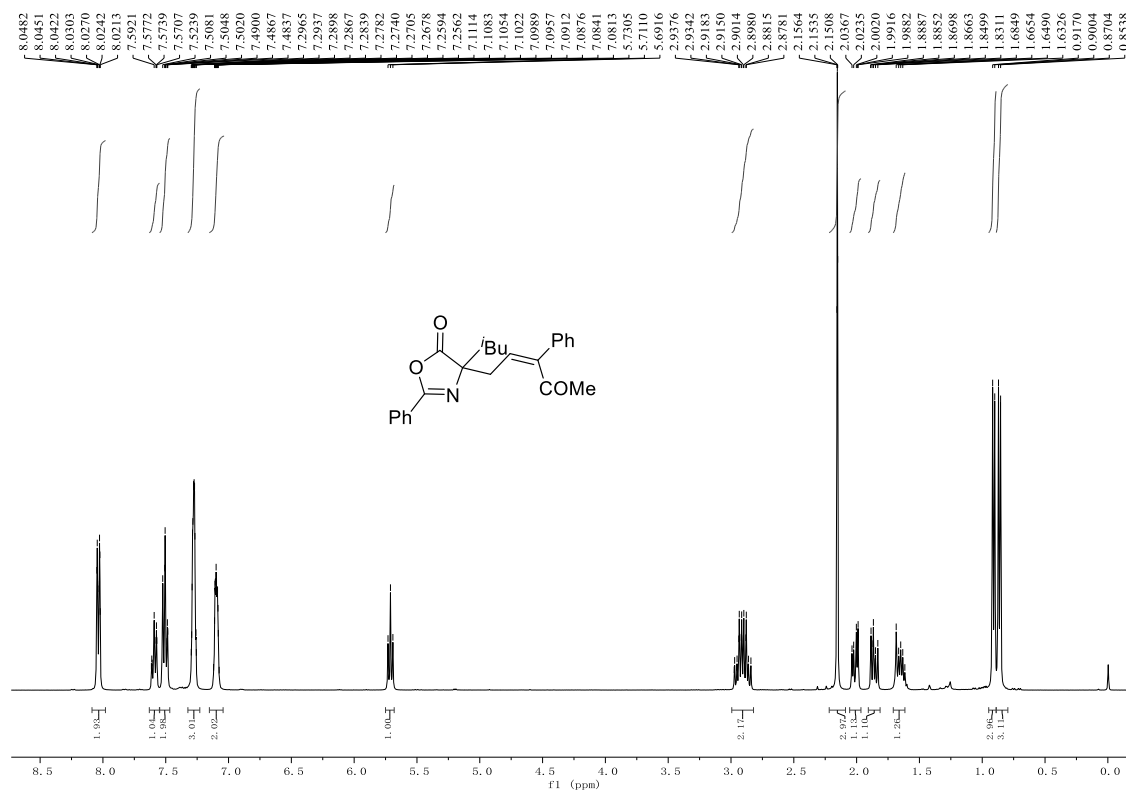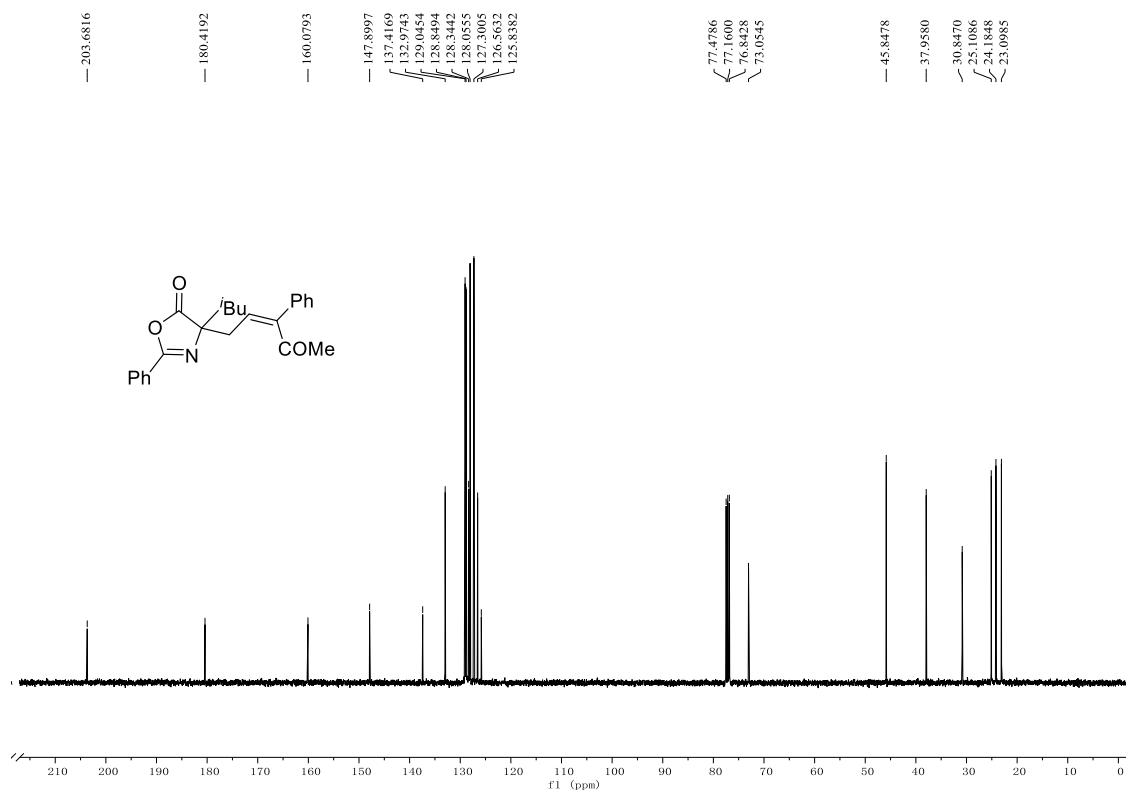

$^1\text{H}$ ,  $^{13}\text{C}$  NMR of compound **3ag**

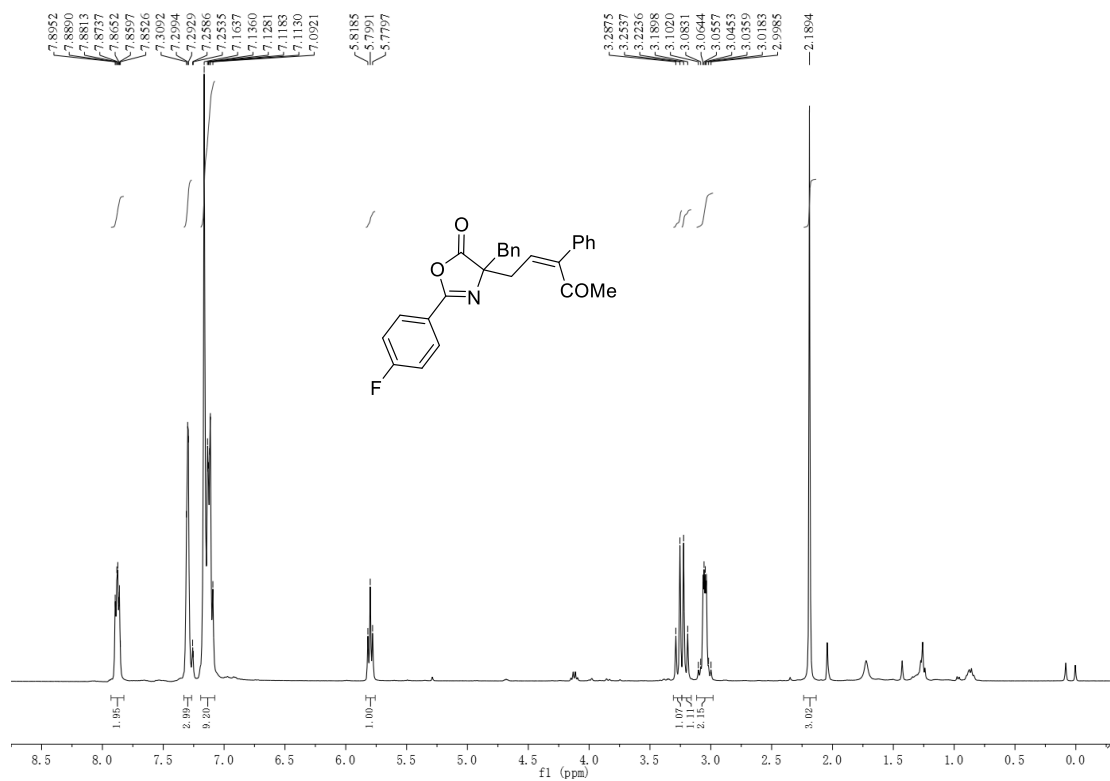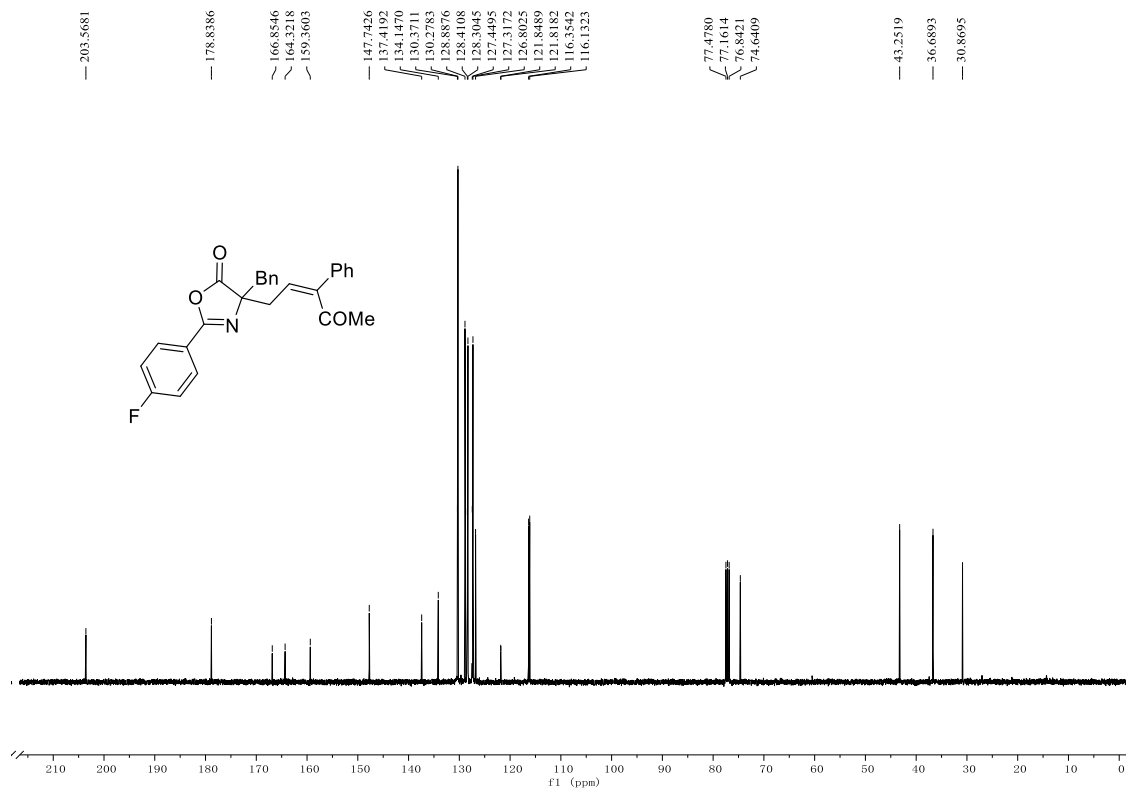



<sup>1</sup>H, <sup>13</sup>C NMR of compound **3ah**

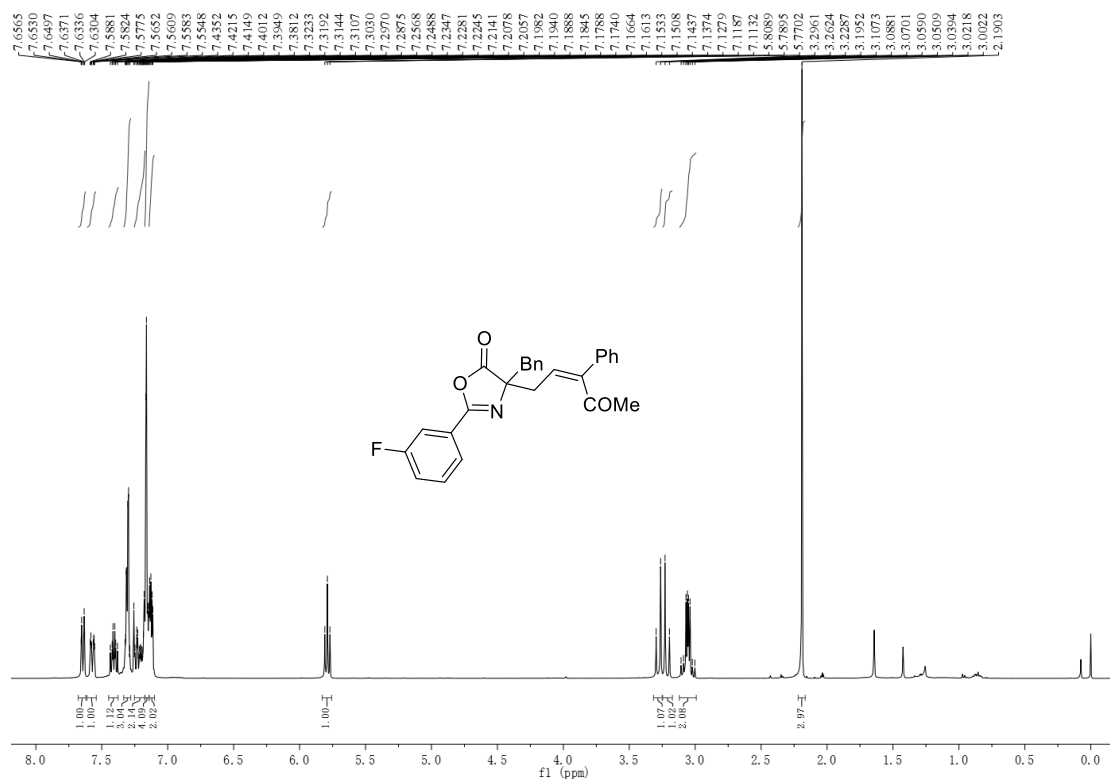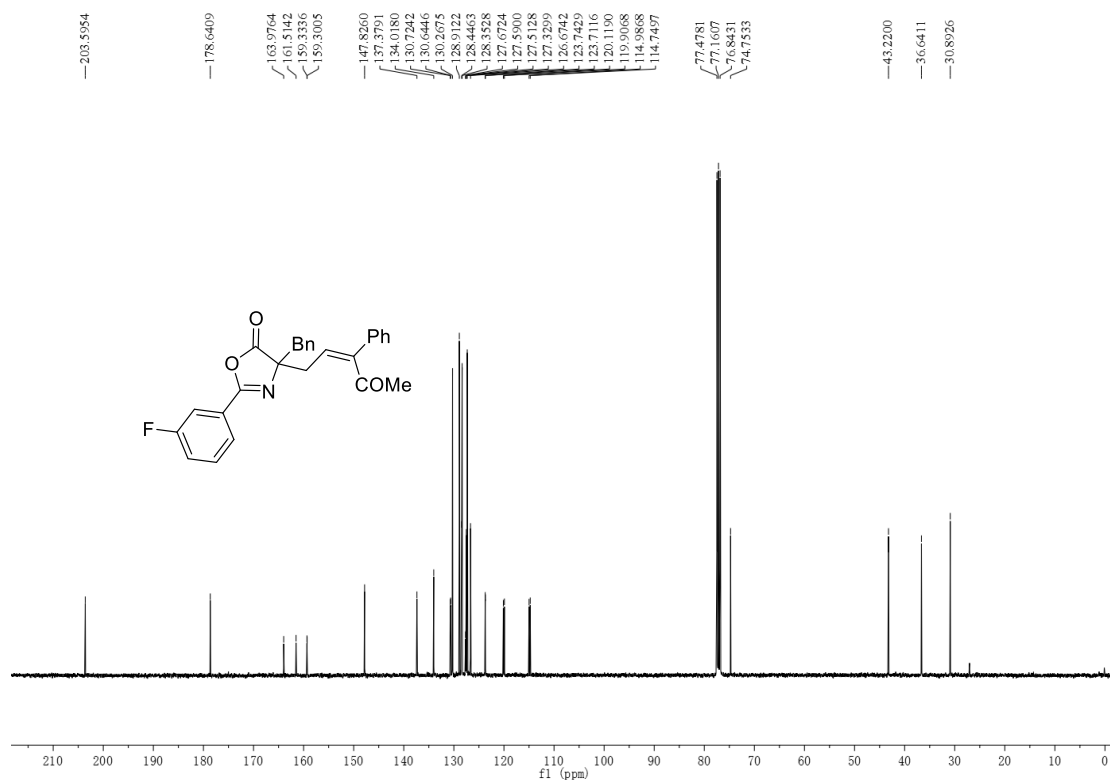

$^1\text{H}$ ,  $^{13}\text{C}$  NMR of compound **3ai**

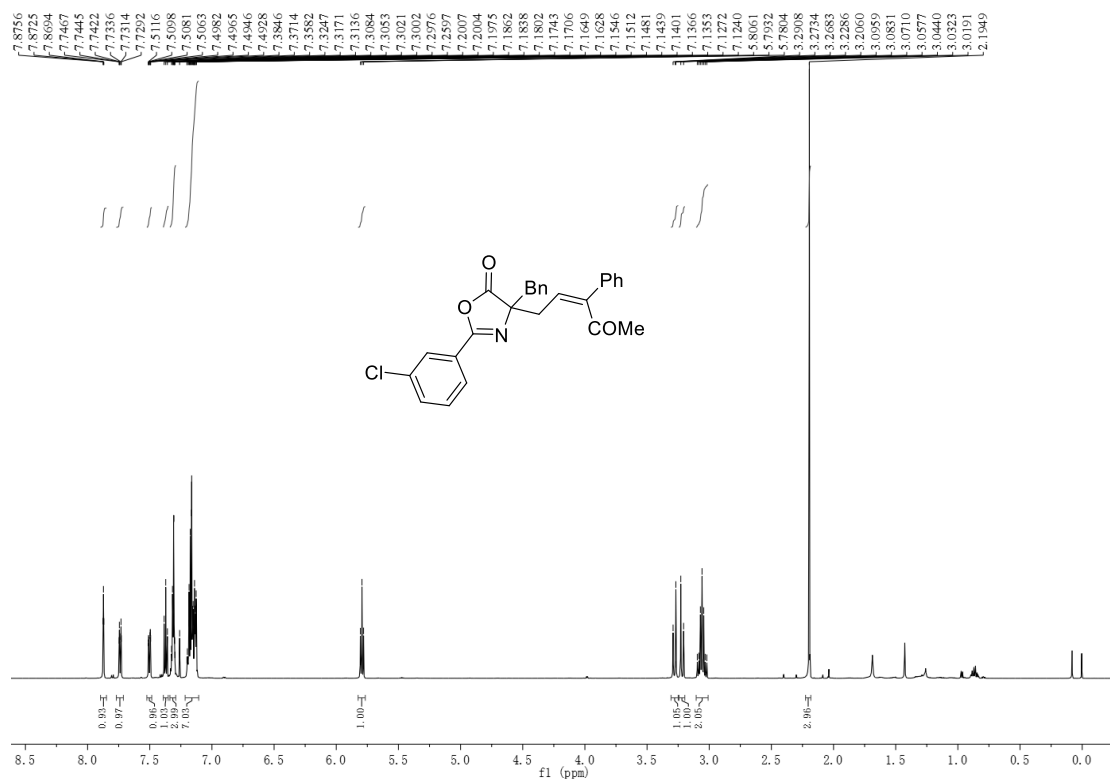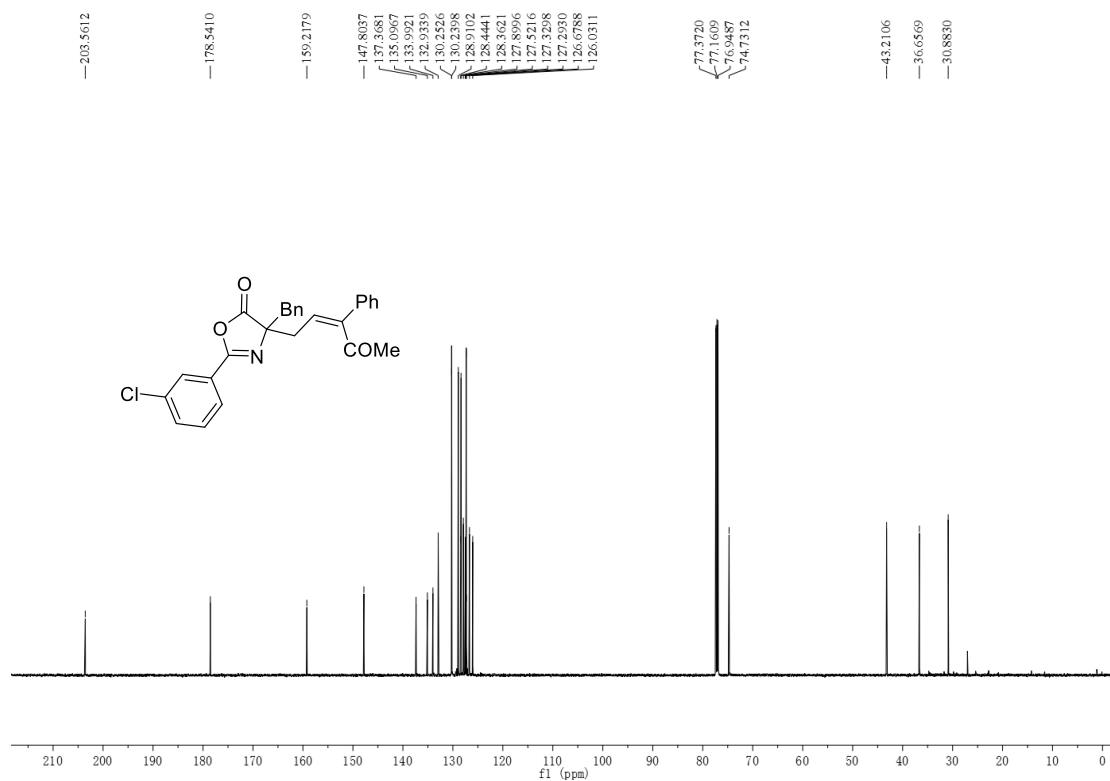

<sup>1</sup>H, <sup>13</sup>C NMR of compound 3aj

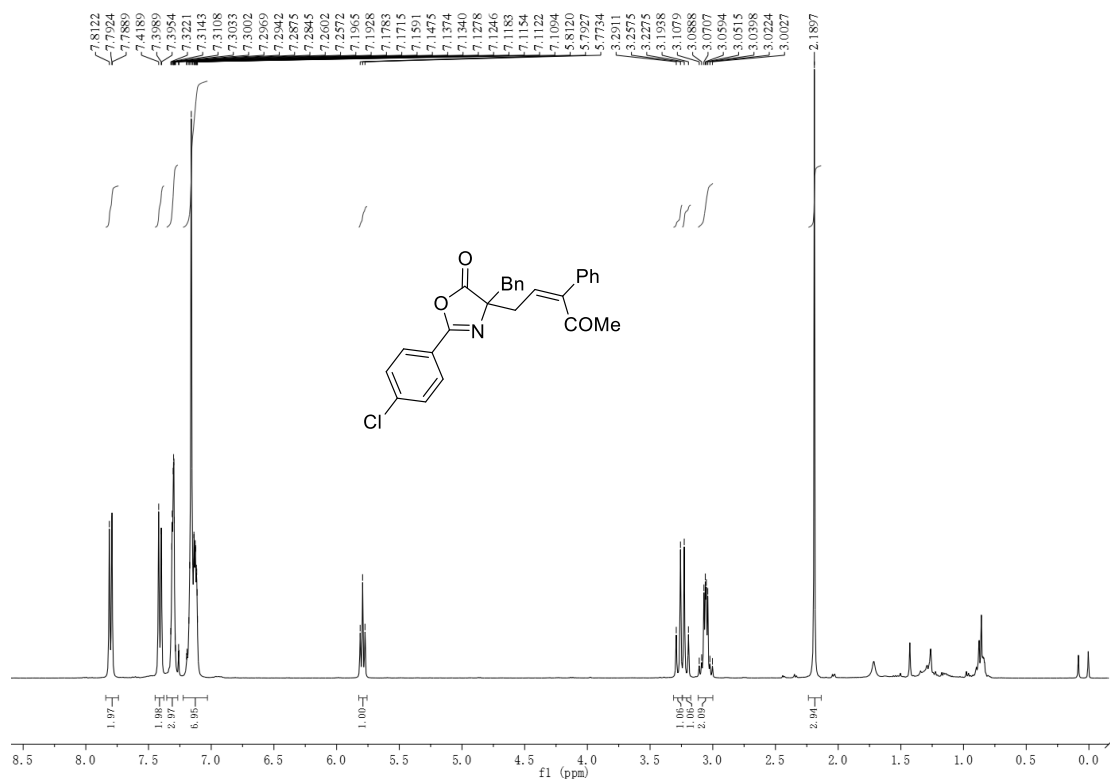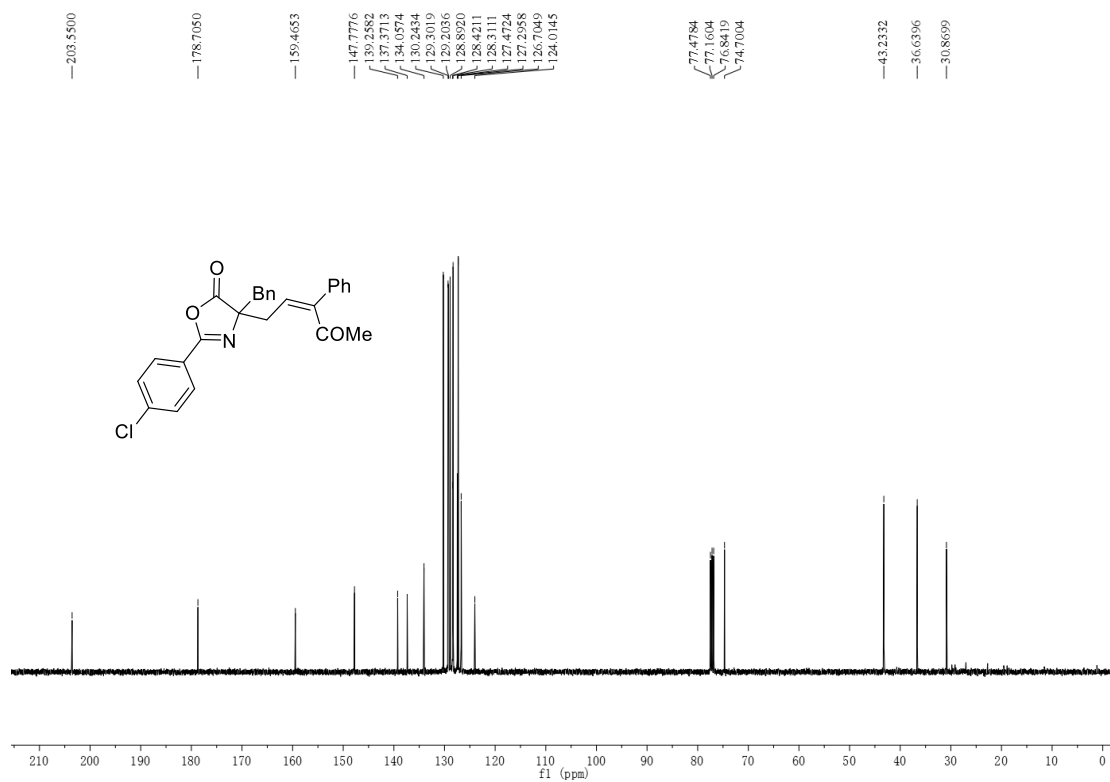

<sup>1</sup>H, <sup>13</sup>C NMR of compound **3ak**

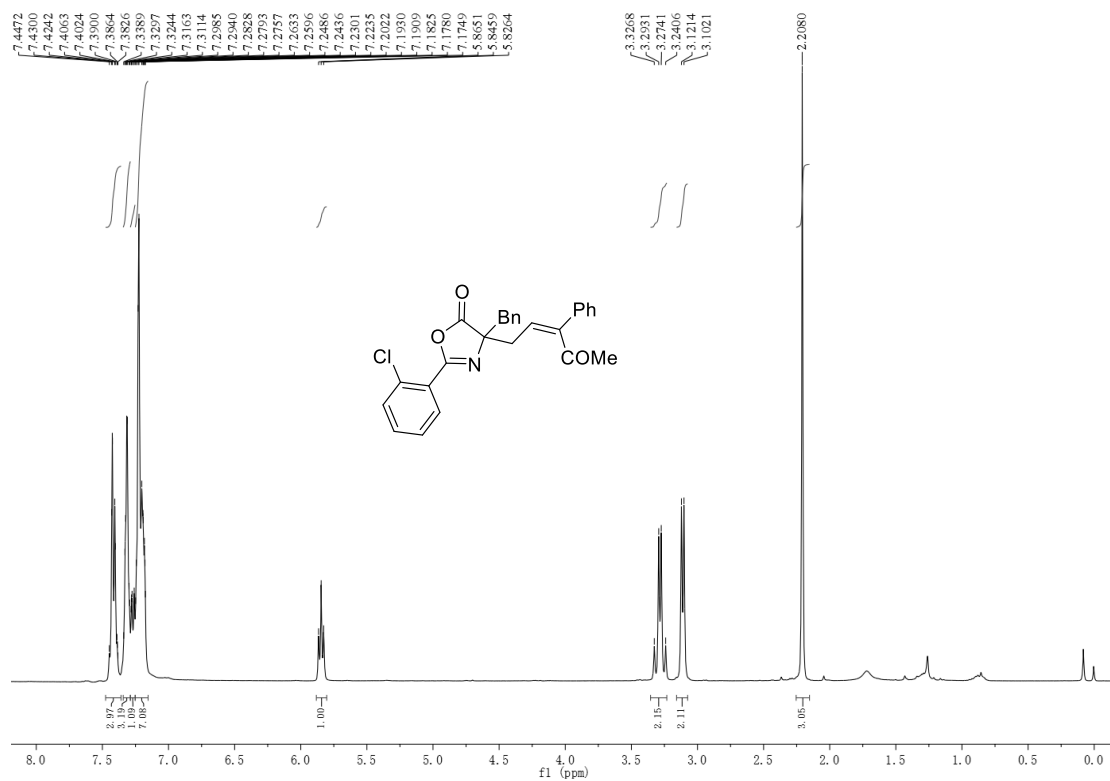

<sup>13</sup>C NMR peaks (ppm): 203.7218, 178.7755, 159.2423, 147.7727, 137.3163, 134.0535, 133.6225, 132.8550, 131.1953, 131.0333, 130.3774, 128.8639, 128.4126, 127.5797, 127.3489, 126.9060, 126.5643, 125.5744, 77.4769, 77.1598, 76.8412, 74.9317, 43.3063, 36.6255, 30.8815.

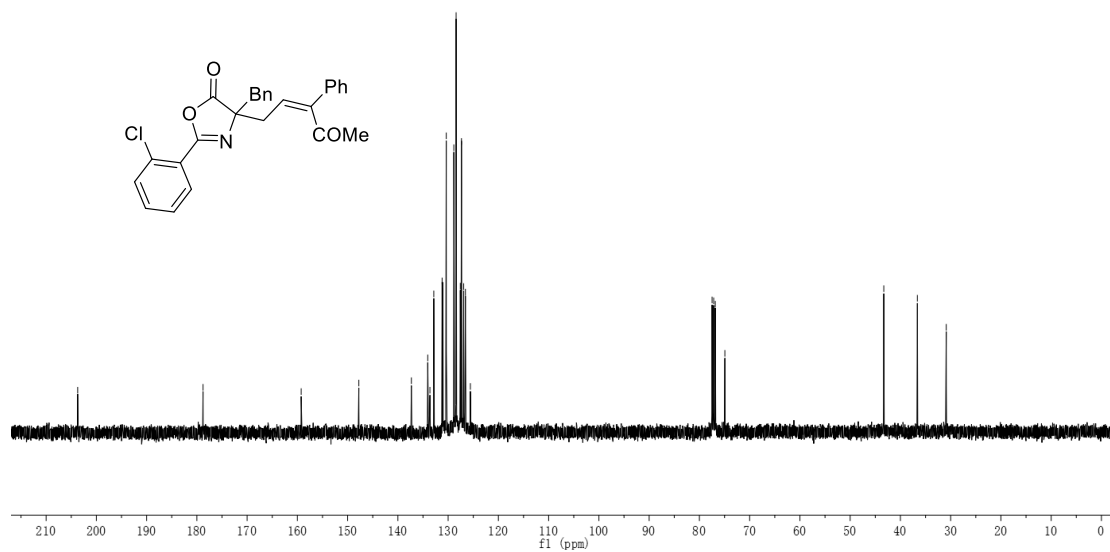

$^1\text{H}$ ,  $^{13}\text{C}$  NMR of compound **3al**

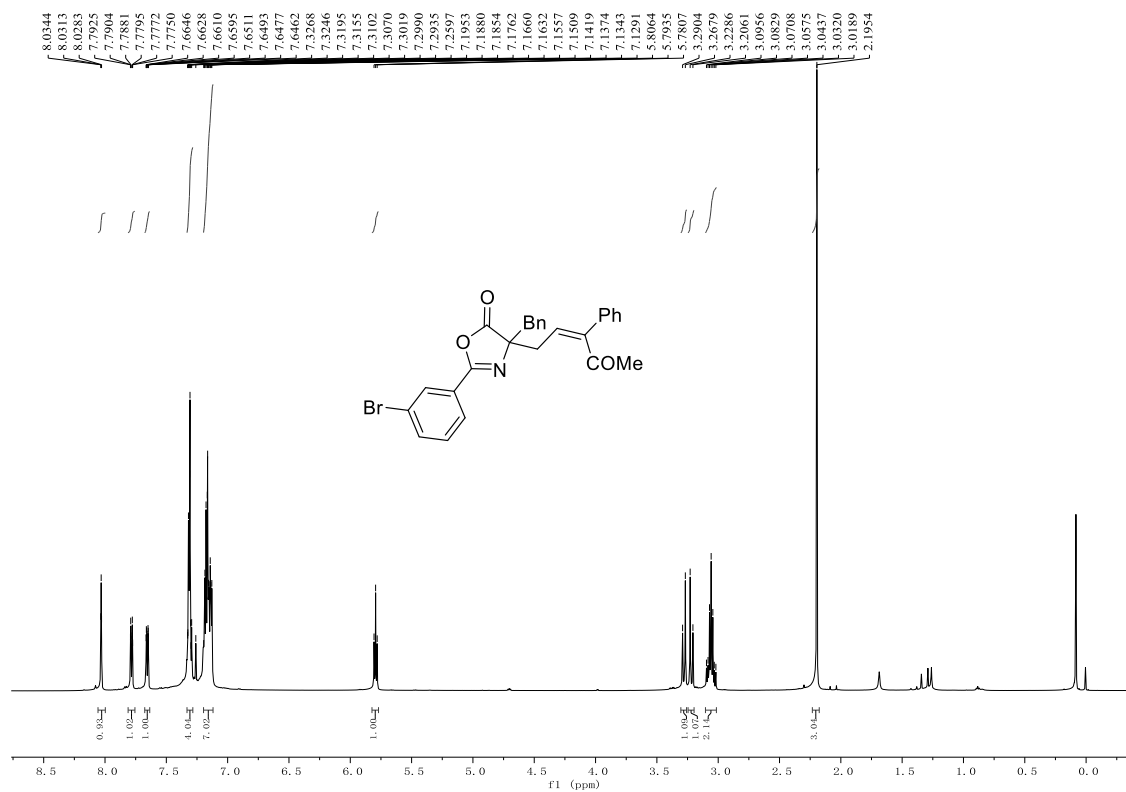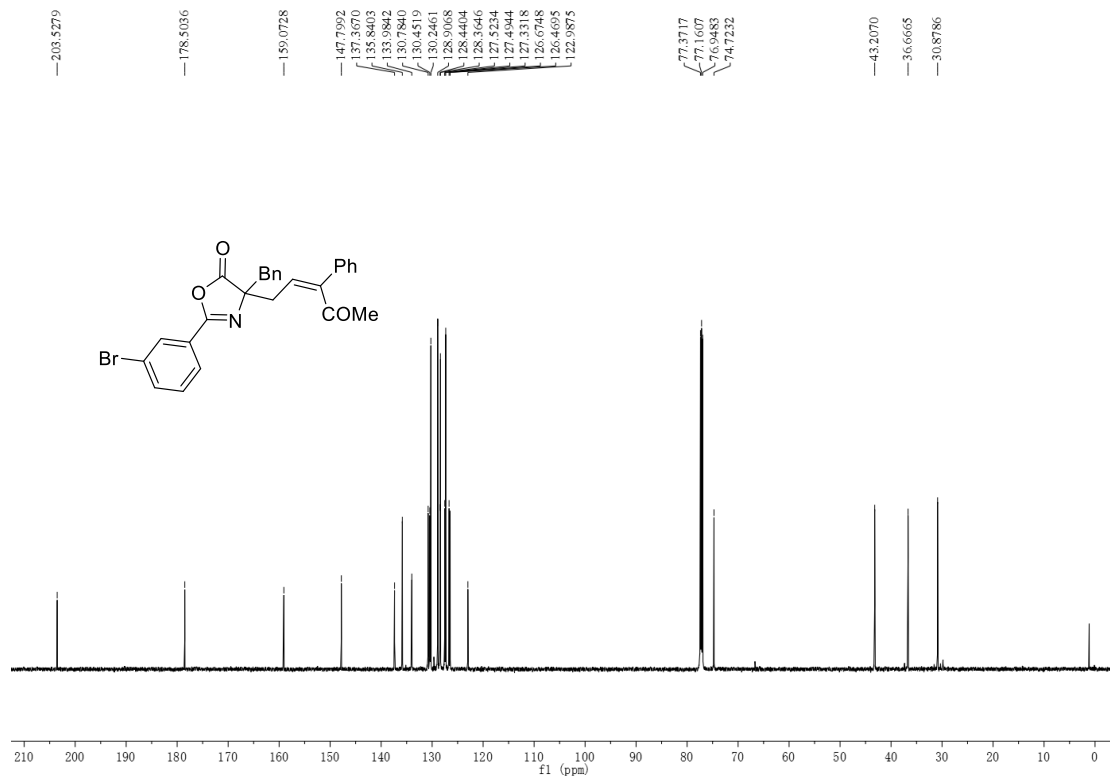

$^1\text{H}$ ,  $^{13}\text{C}$  NMR of compound **3am**

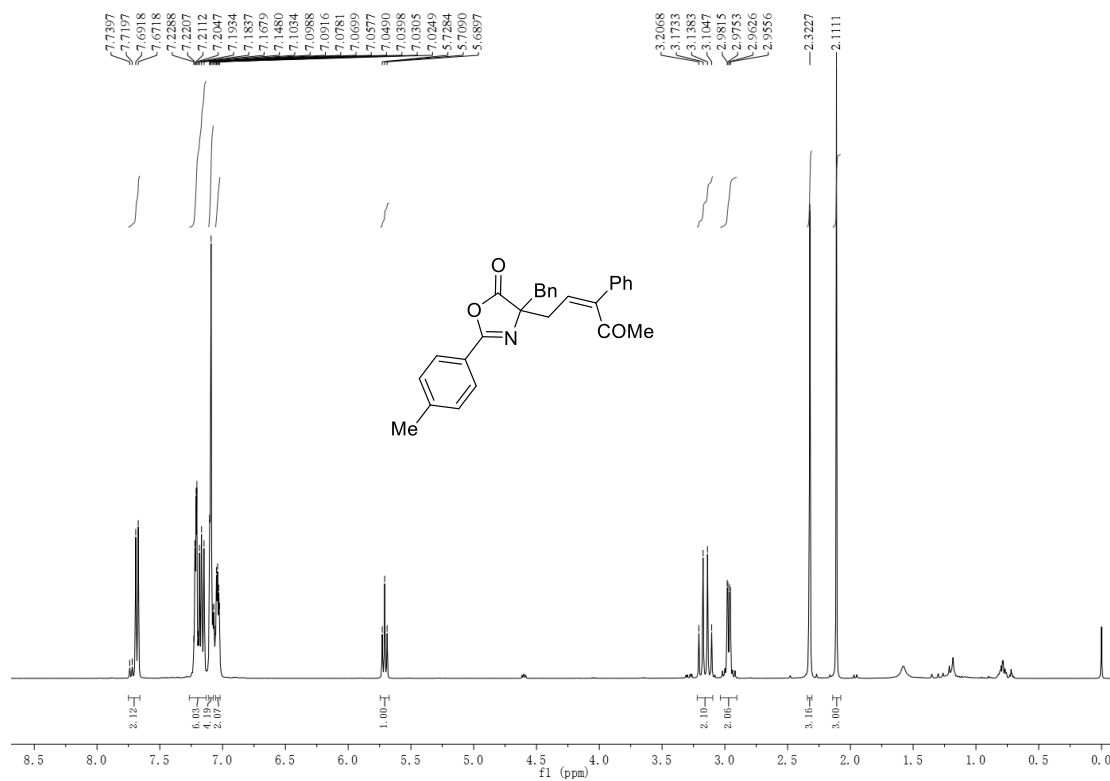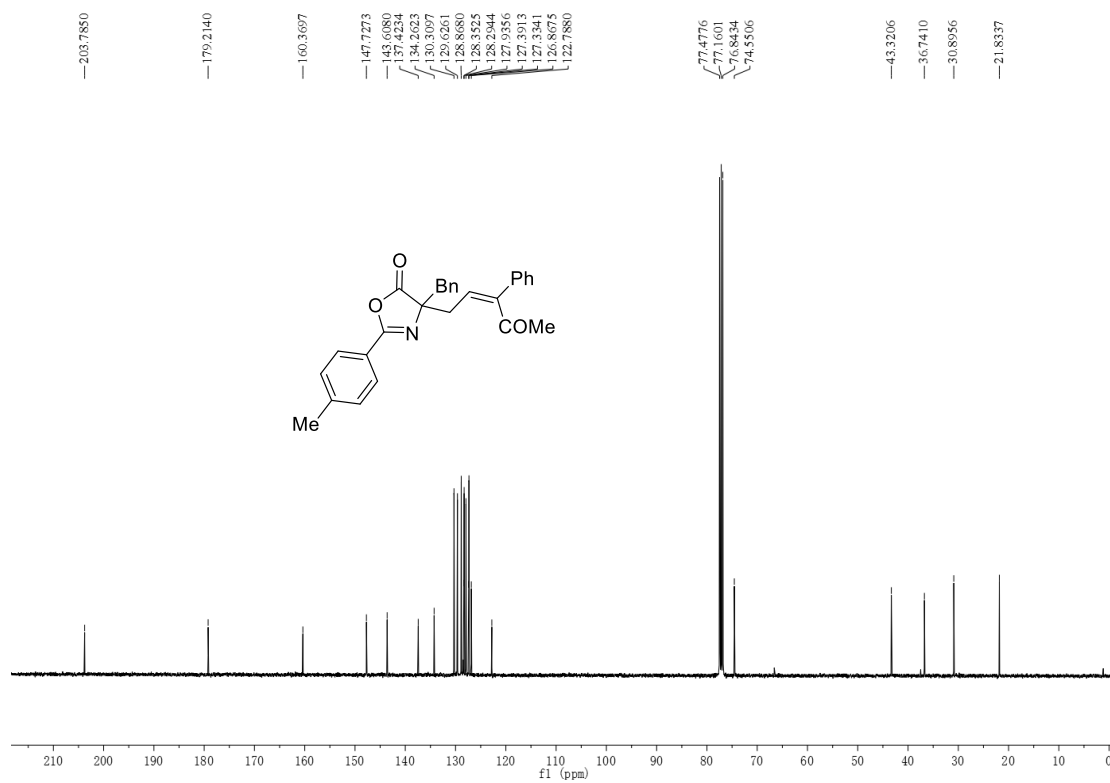

# $^1\text{H}$ , $^{13}\text{C}$ NMR of compound **3an**

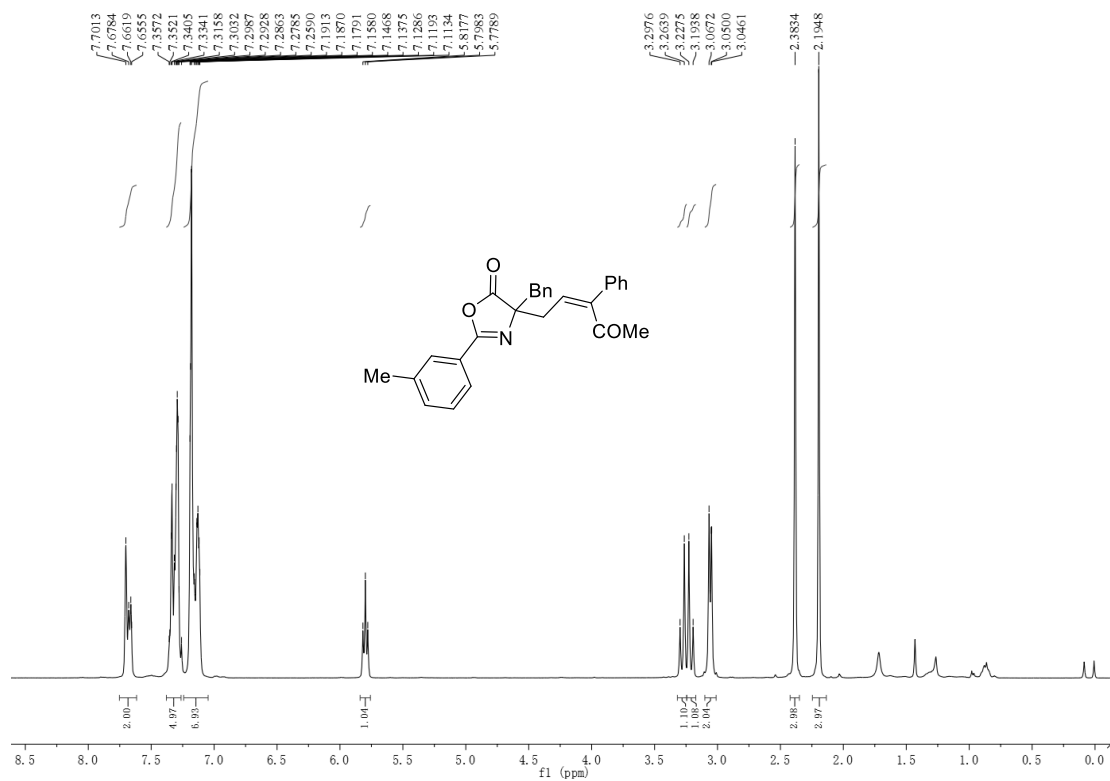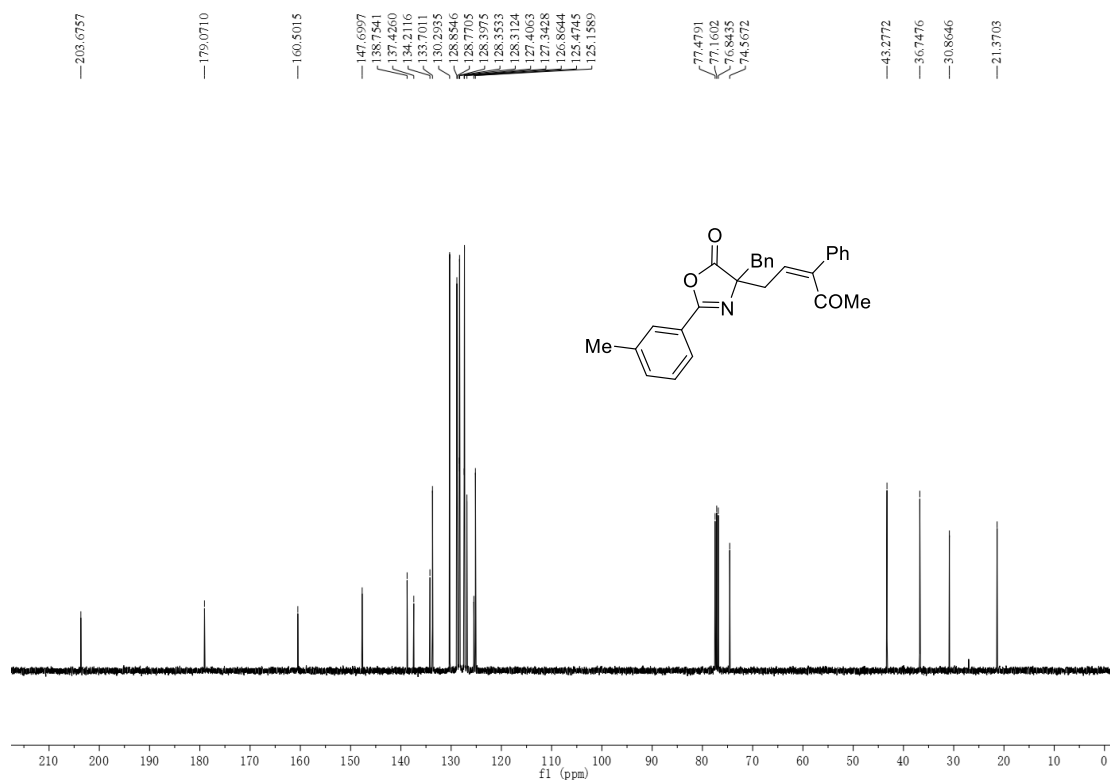

$^1\text{H}$ ,  $^{13}\text{C}$  NMR of compound **3ao**

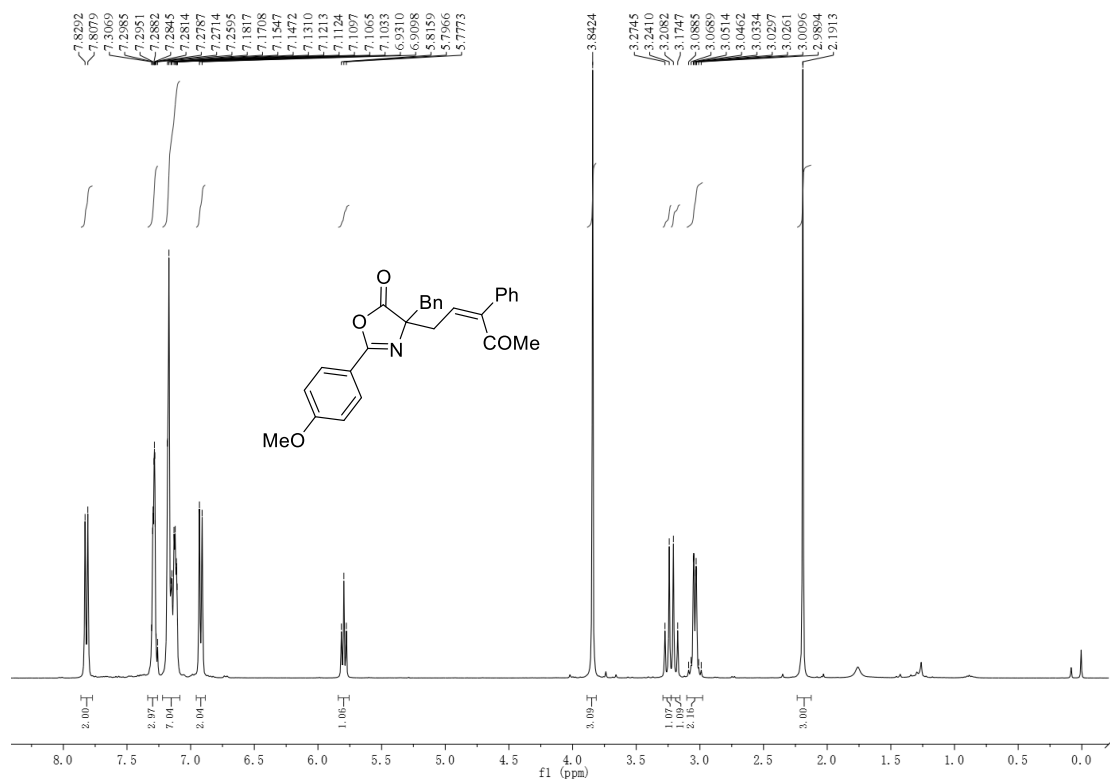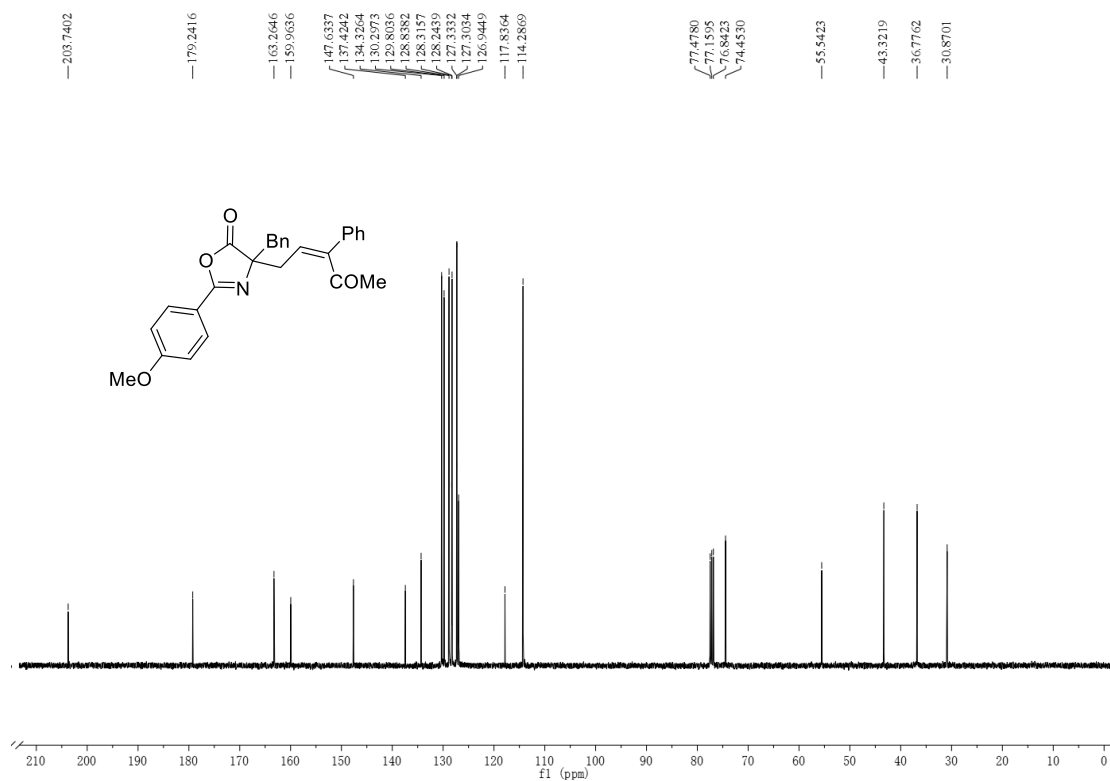



$^1\text{H}$ ,  $^{13}\text{C}$  NMR of compound **3ap**

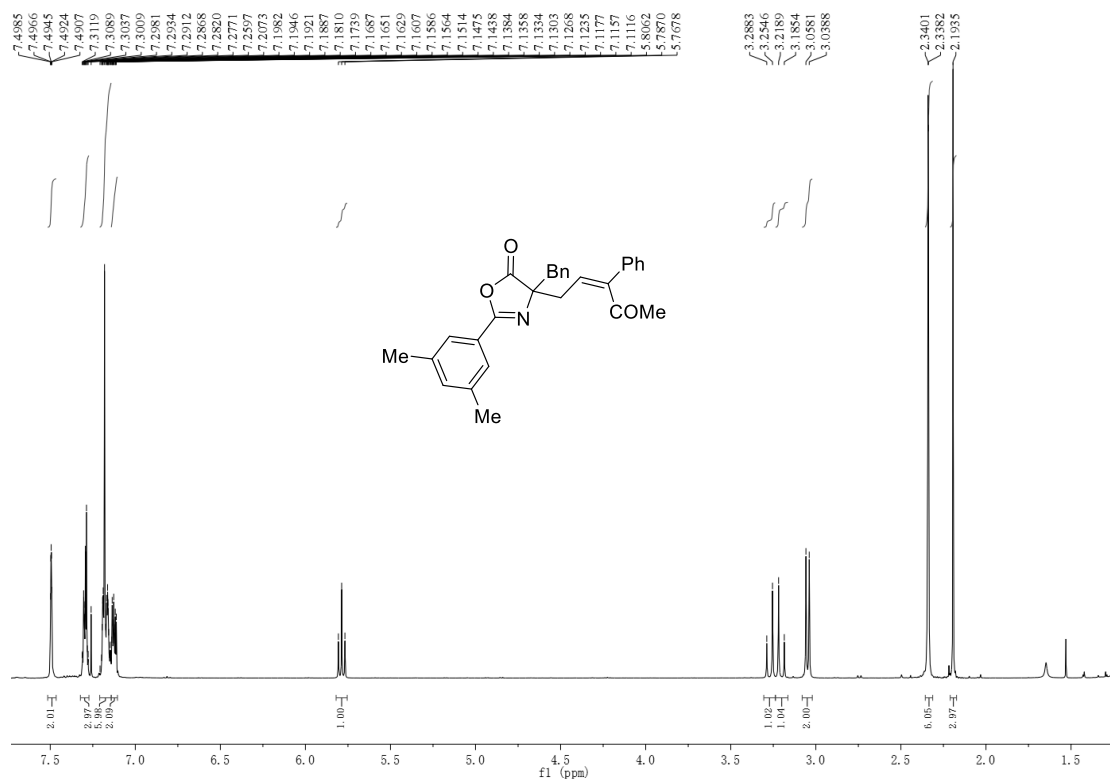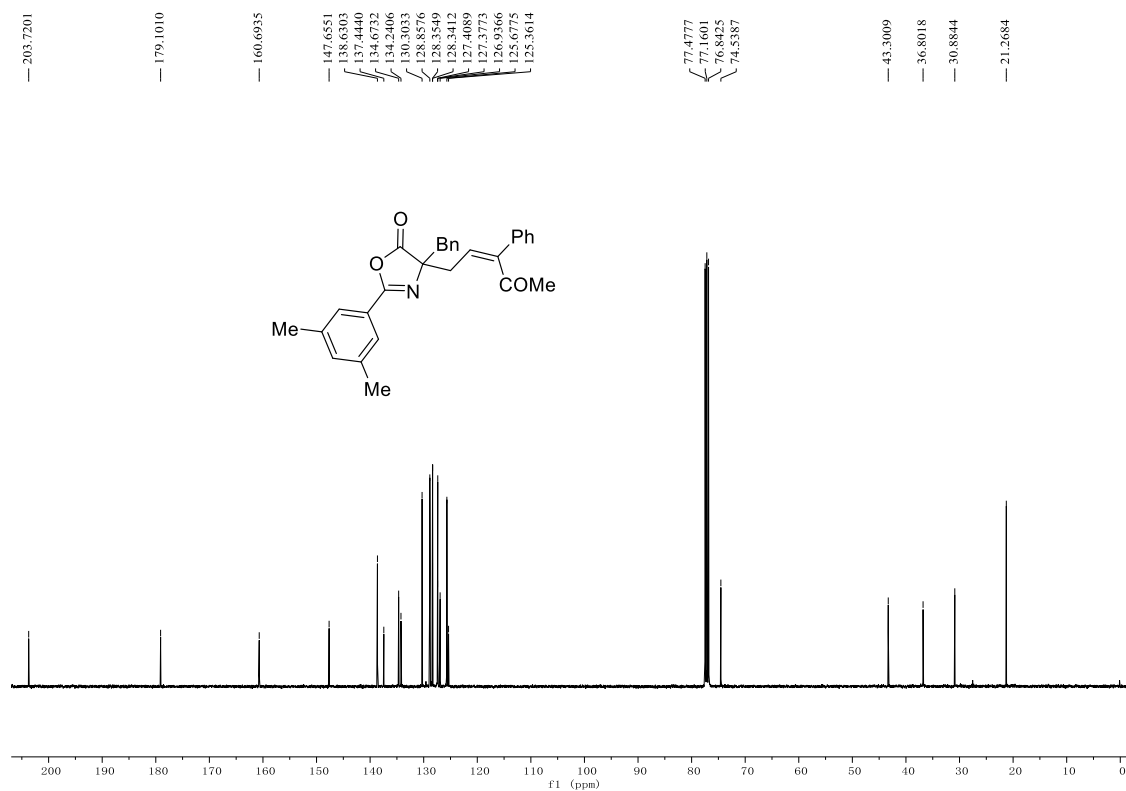

$^1\text{H}$ ,  $^{13}\text{C}$  NMR of compound **3aq**

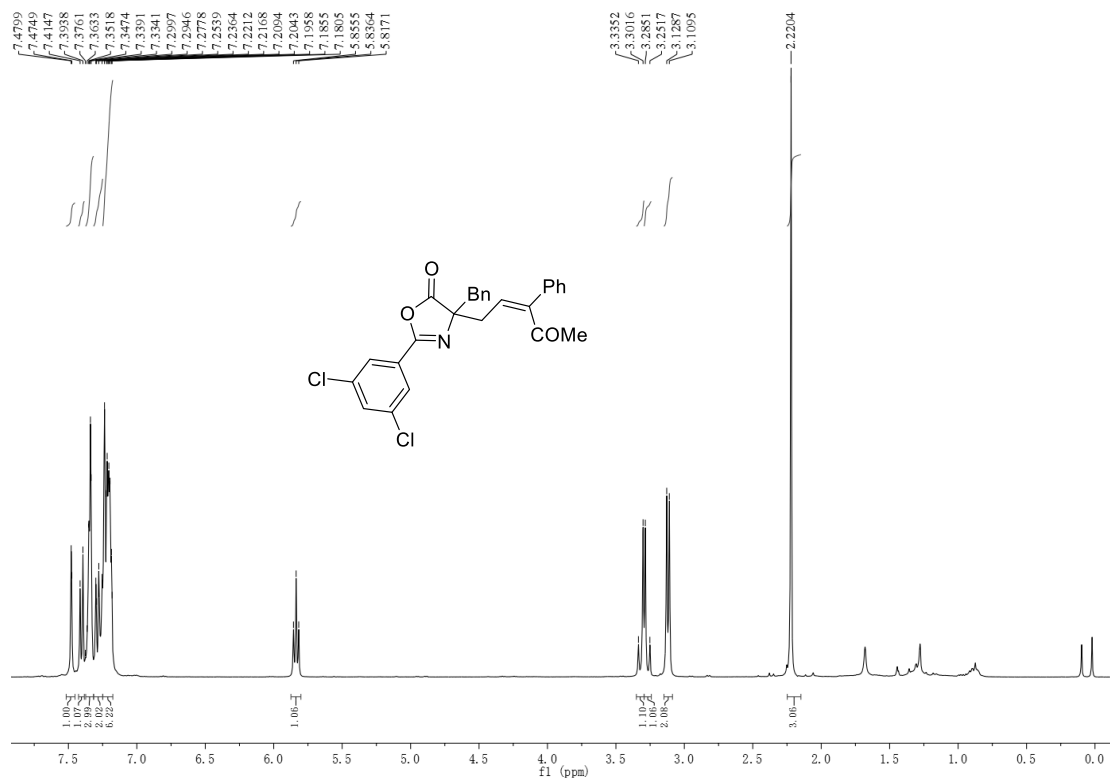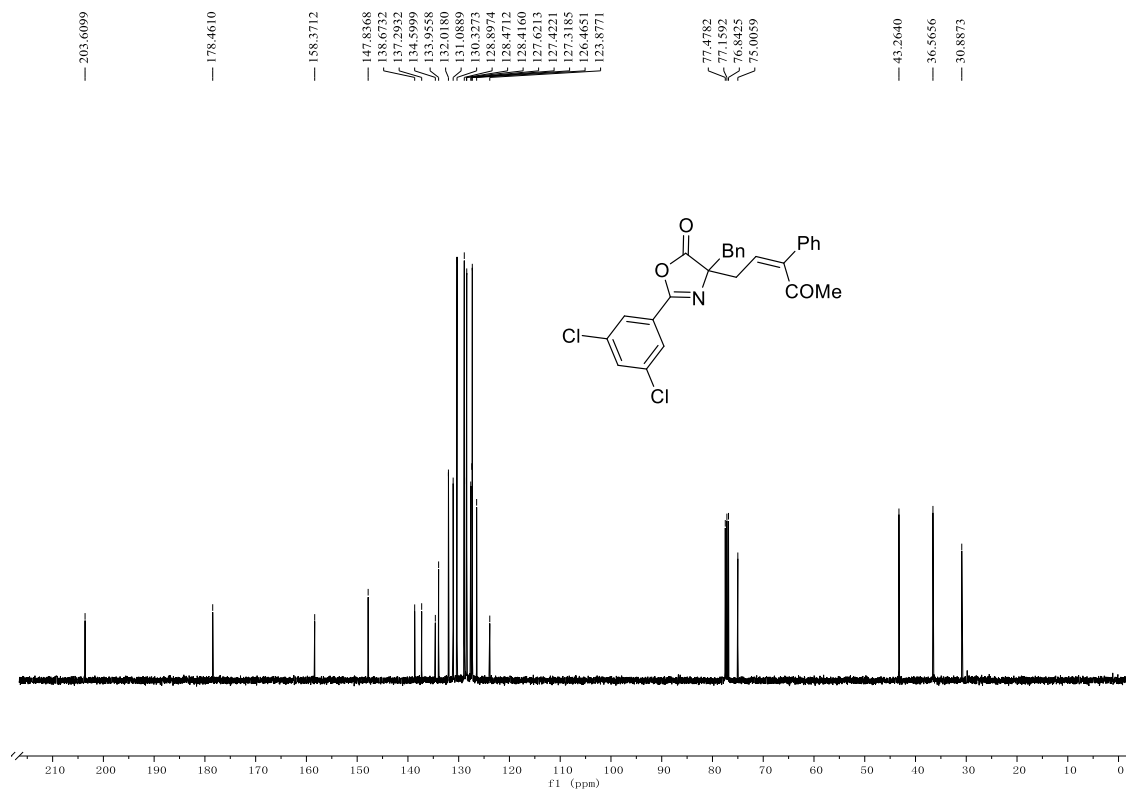

$^1\text{H}$ ,  $^{13}\text{C}$  NMR of compound **3ar**

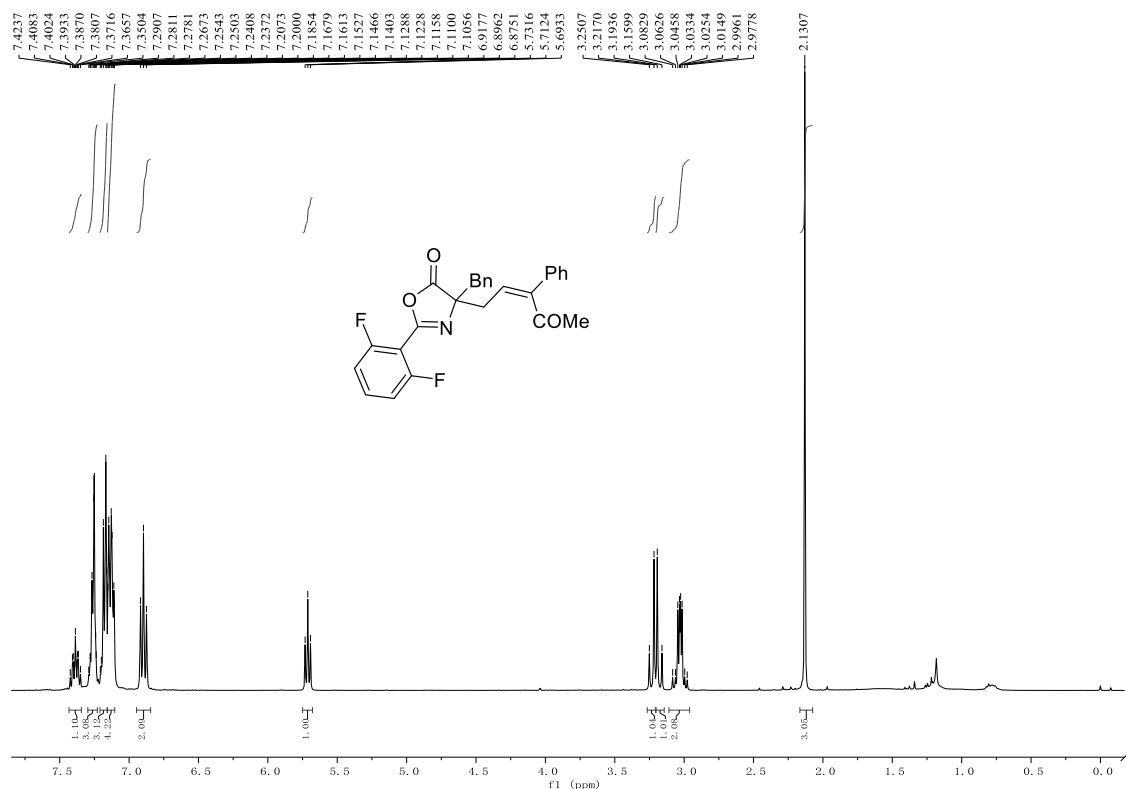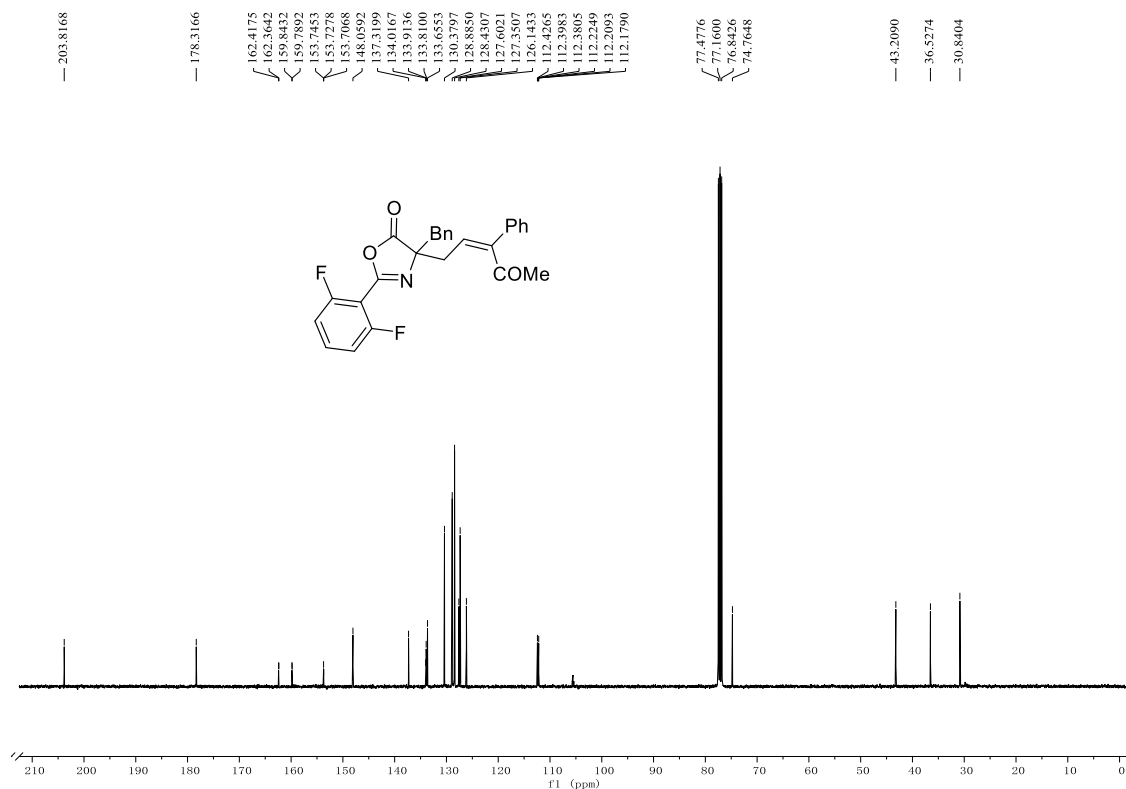

<sup>1</sup>H, <sup>13</sup>C NMR of compound **3as**

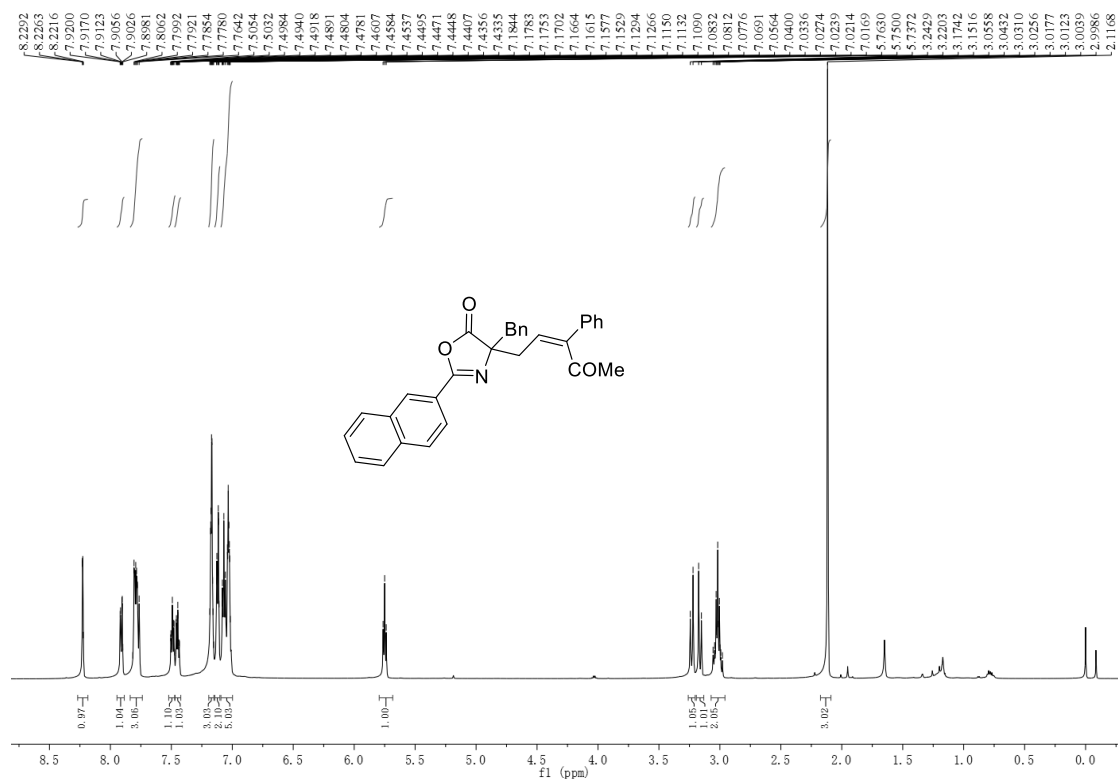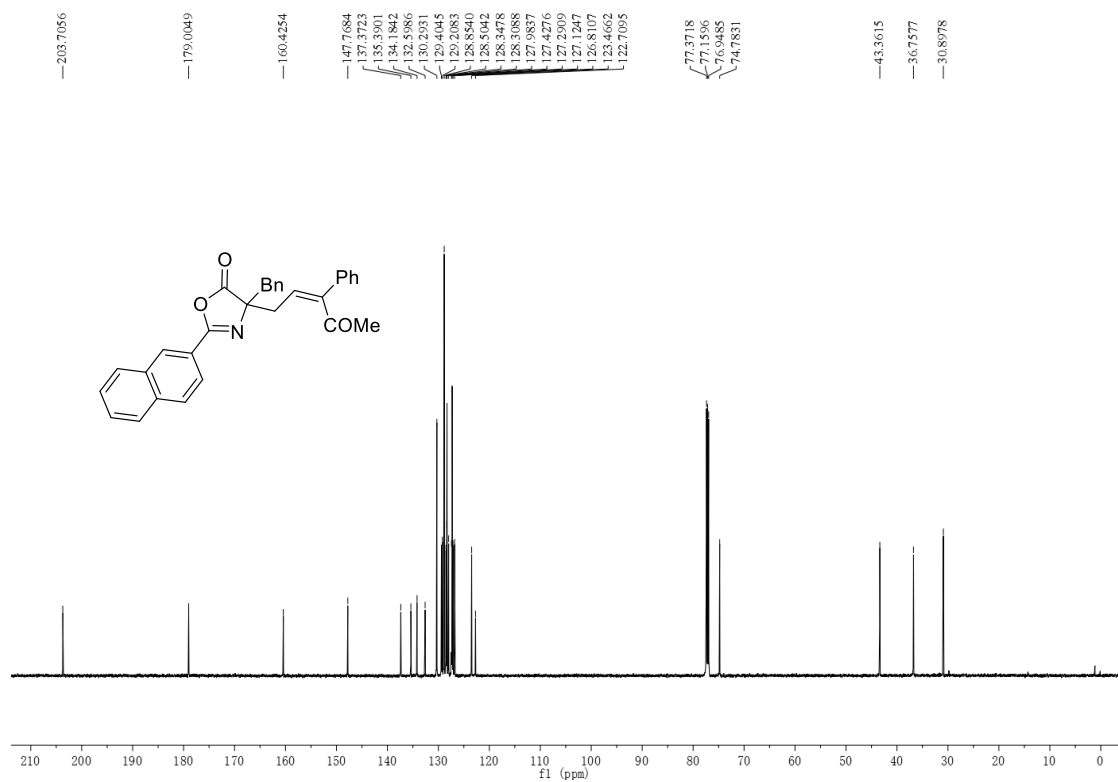

$^1\text{H}$ ,  $^{13}\text{C}$  NMR of compound **3at**

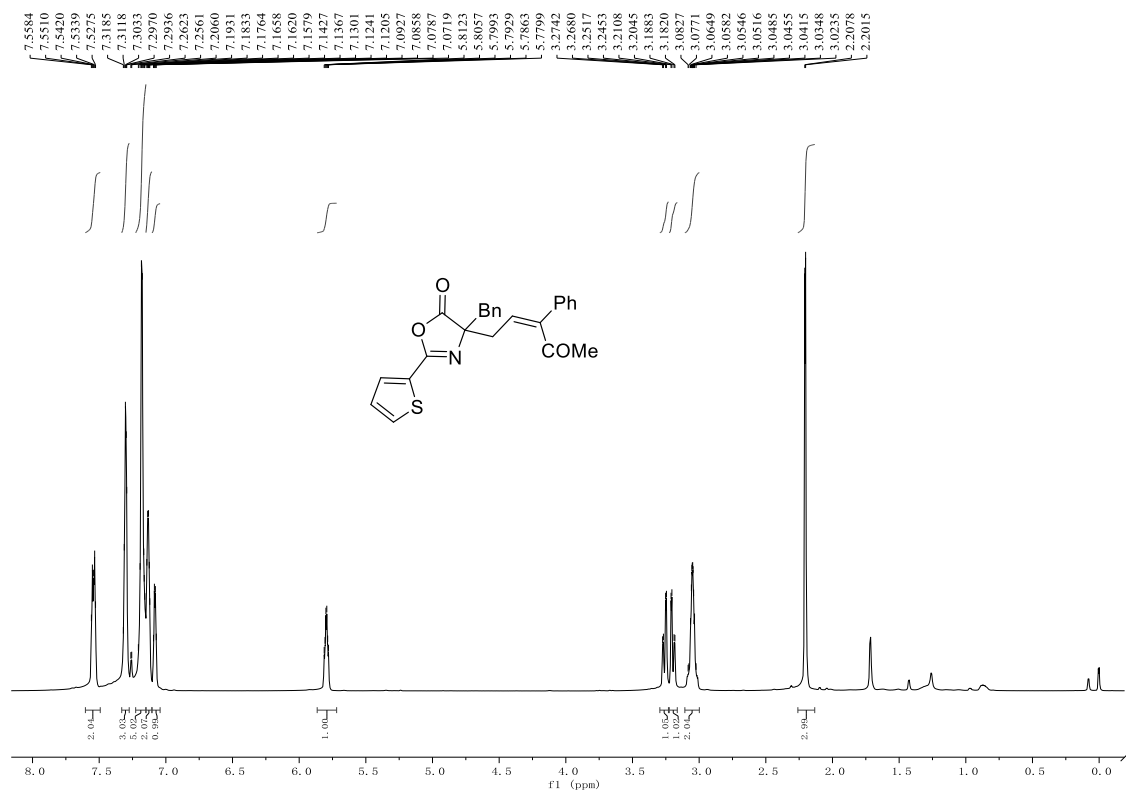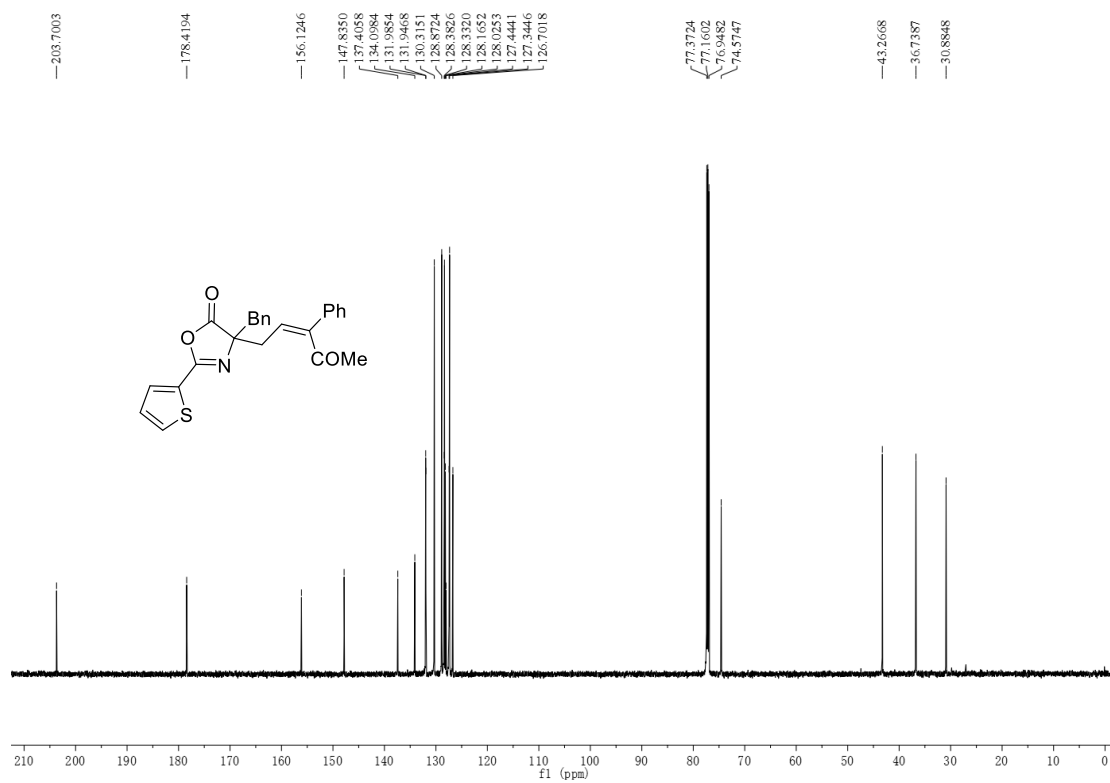

$^1\text{H}$ ,  $^{13}\text{C}$  NMR of compound **5**

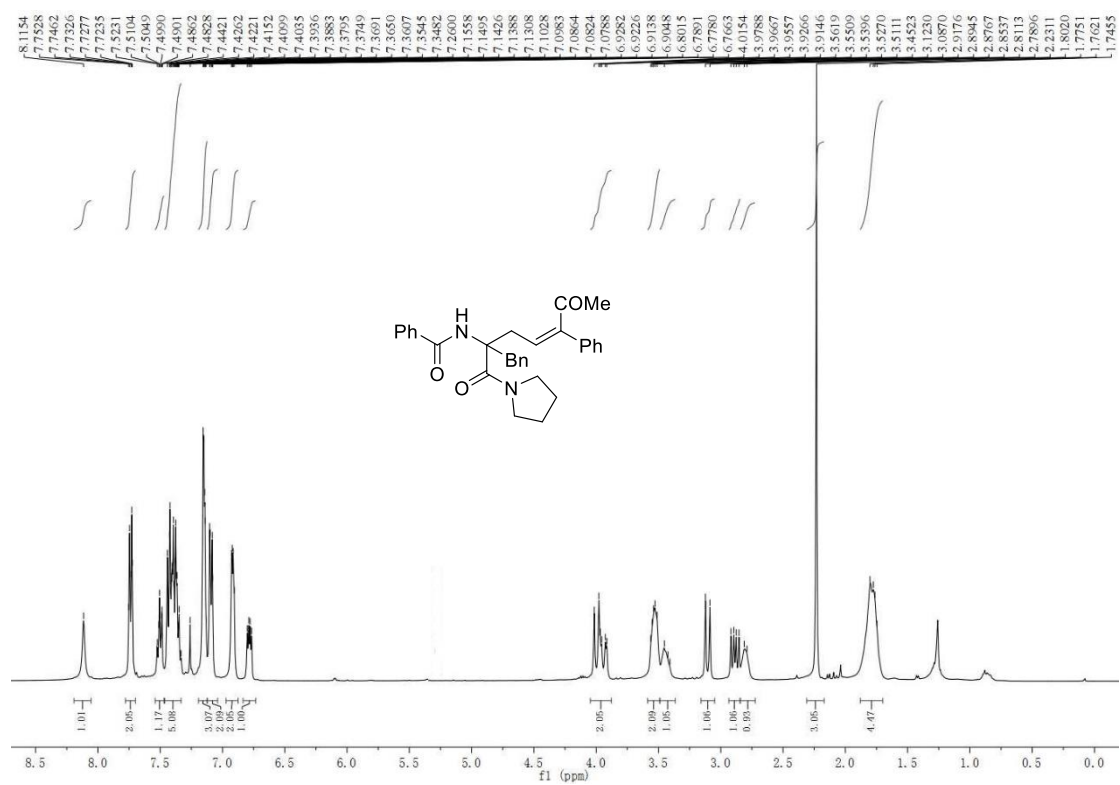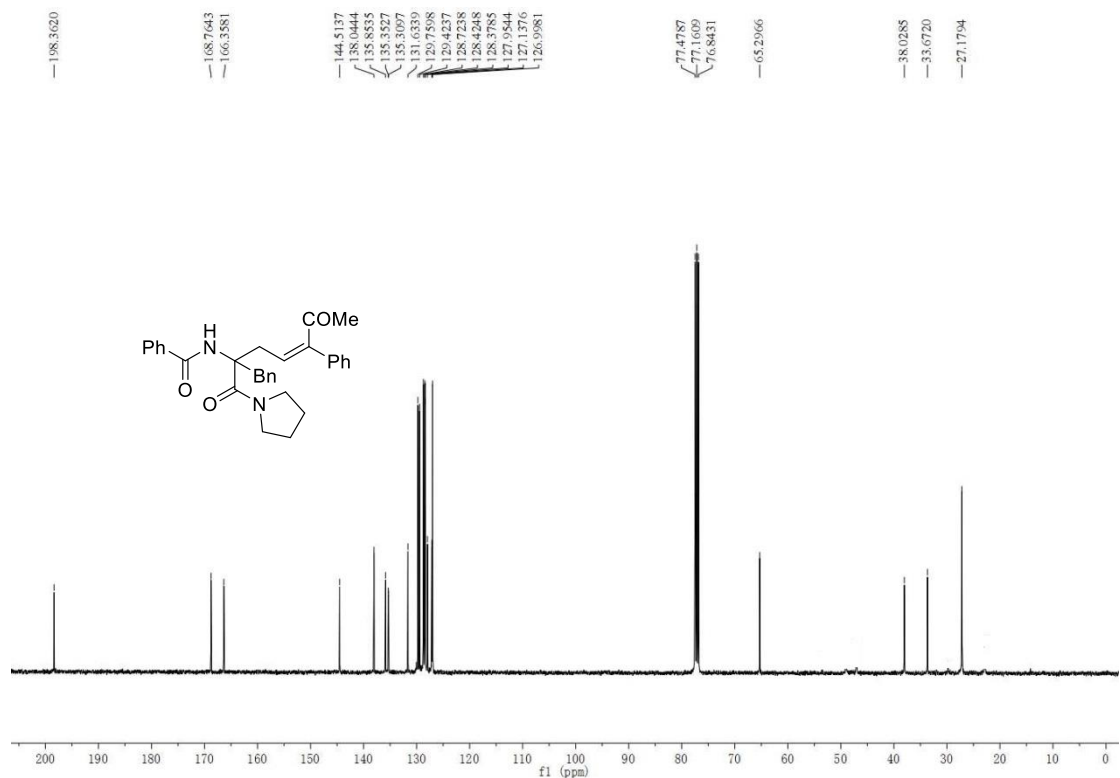

# $^1\text{H}$ , $^{13}\text{C}$ NMR of compound 6

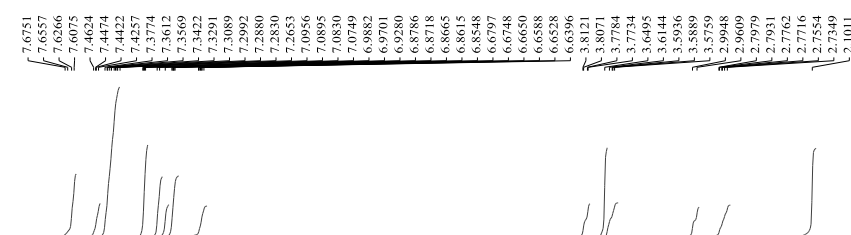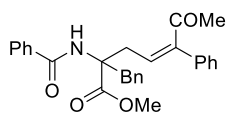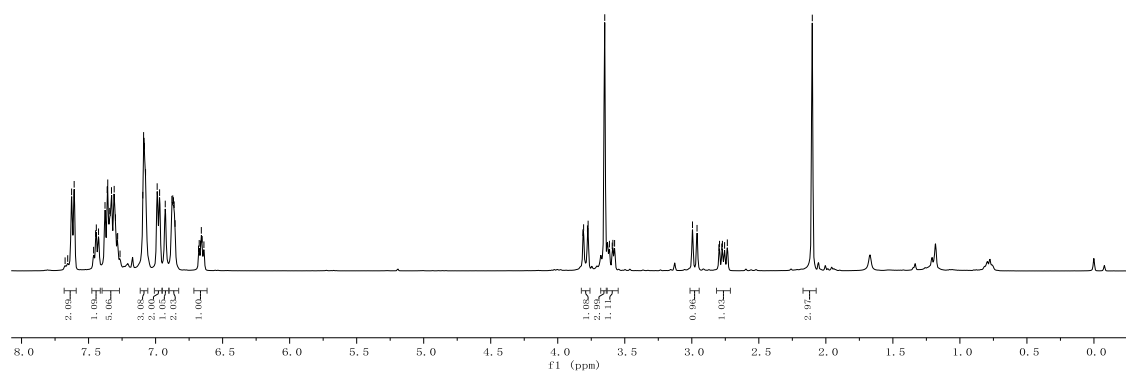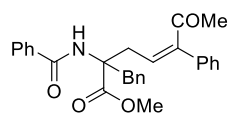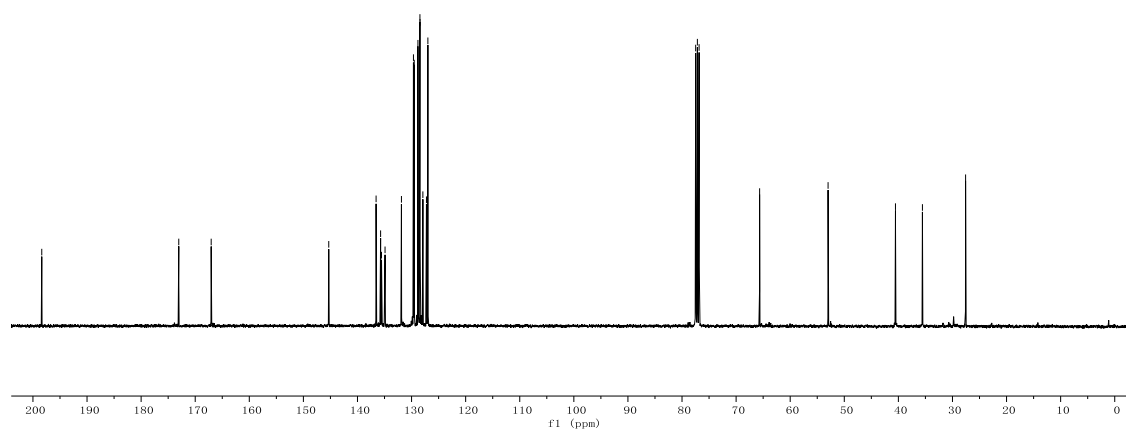

<sup>1</sup>H, <sup>13</sup>C NMR of compound 7

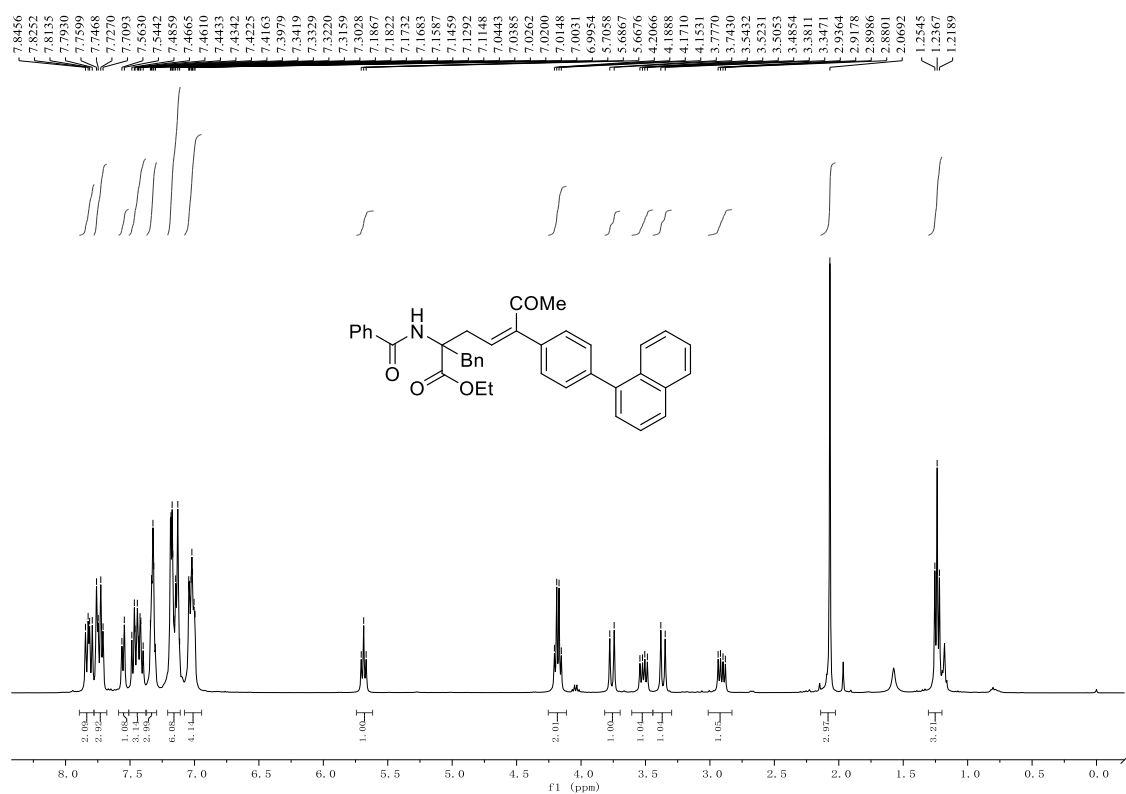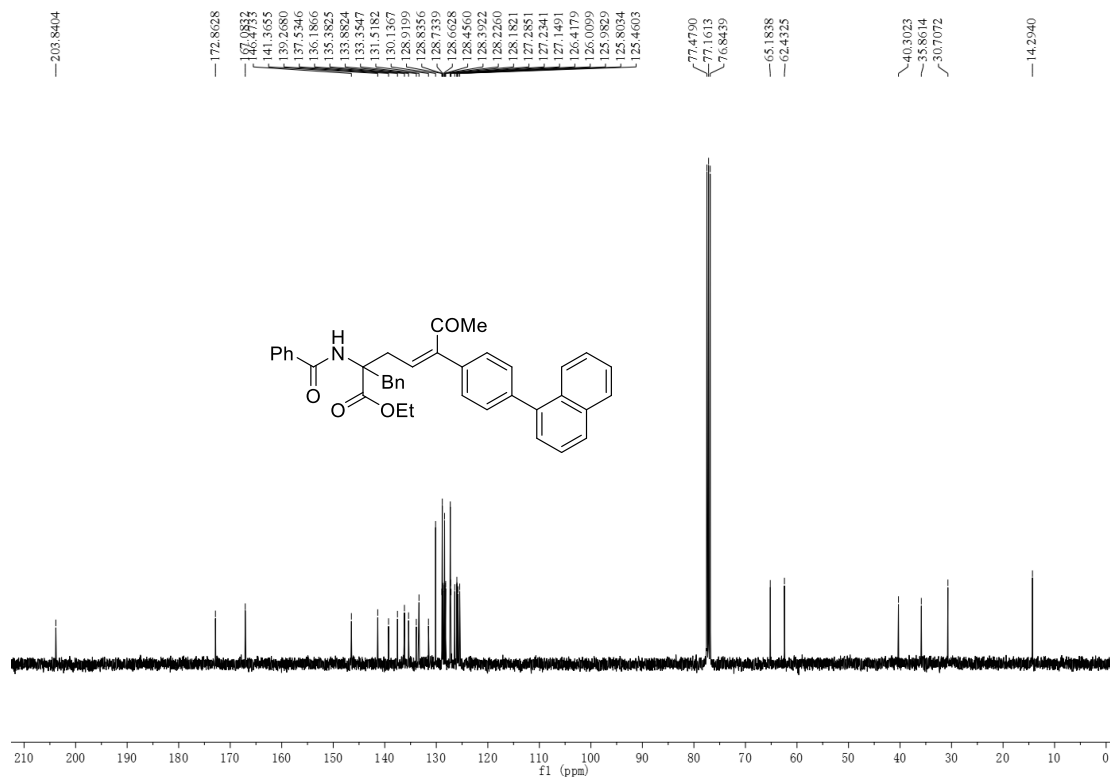



## HPLC of 3aa

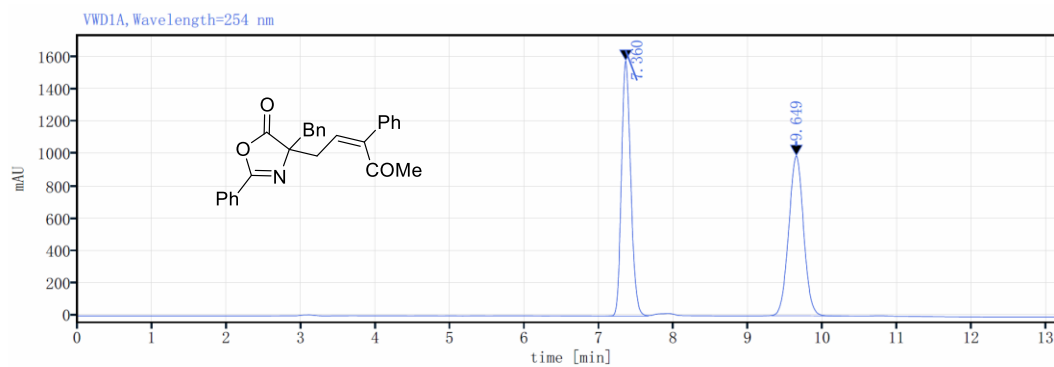

Detector VWD1A, Wavelength=254 nm

| Peak | Ret.Time [min] | Area     | Height  | Area%  |
|------|----------------|----------|---------|--------|
|      | 7.360          | 13638.29 | 1577.49 | 49.93  |
|      | 9.649          | 13678.22 | 987.97  | 50.07  |
|      |                | 27316.51 |         | 100.00 |

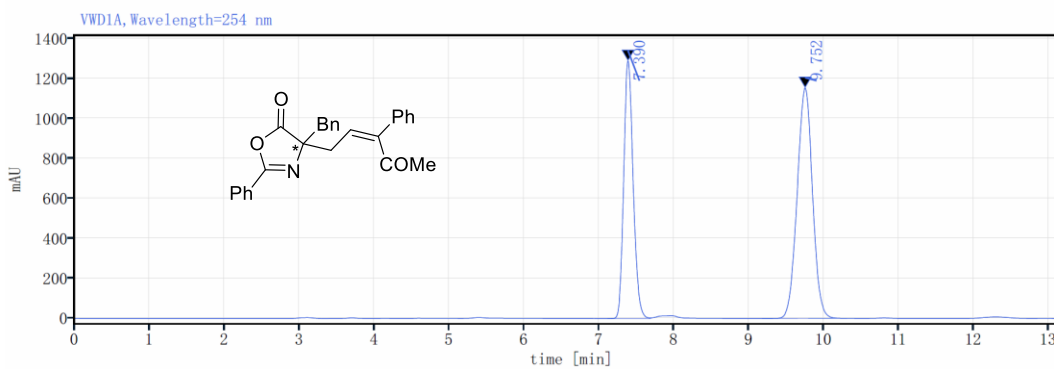

Detector VWD1A, Wavelength=254 nm

| Peak | Ret.Time [min] | Area     | Height  | Area%  |
|------|----------------|----------|---------|--------|
|      | 7.390          | 11309.71 | 1290.01 | 40.81  |
|      | 9.752          | 16404.13 | 1153.75 | 59.19  |
|      |                | 27713.84 |         | 100.00 |
